# Supplementary material
Source: Elsevier journal article supplement (https://comptes-rendus.academie-sciences.fr/chimie/article/10.1016/j.crci.2017.01.003/file/attach/mmc1.pdf)

## Supporting information

### Zinc Mediated a Straightforward Access to Diacylpyrroles

**Djiby Faye,<sup>[a, b]</sup> Mbaye Diagne Mbaye,<sup>\*[a]</sup> Sébastien Coufourier,<sup>[c]</sup> Alexis Lator,<sup>[c]</sup> Samba Yandé Dieng,<sup>[b]</sup> Sylvain Gaillard<sup>[c]</sup> and Jean-Luc Renaud<sup>\*[c]</sup>**

[a] Université Assane Seck de Ziguinchor, Laboratoire de Chimie et Physique des Matériaux, BP 523, Ziguinchor, Sénégal.

[b] Université de Dakar, Département de Chimie, Faculté des Sciences, Dakar, Sénégal.

[c] Normandie Univ., LCMT, ENSICAEN, UNICAEN, CNRS, 14000 Caen, France.

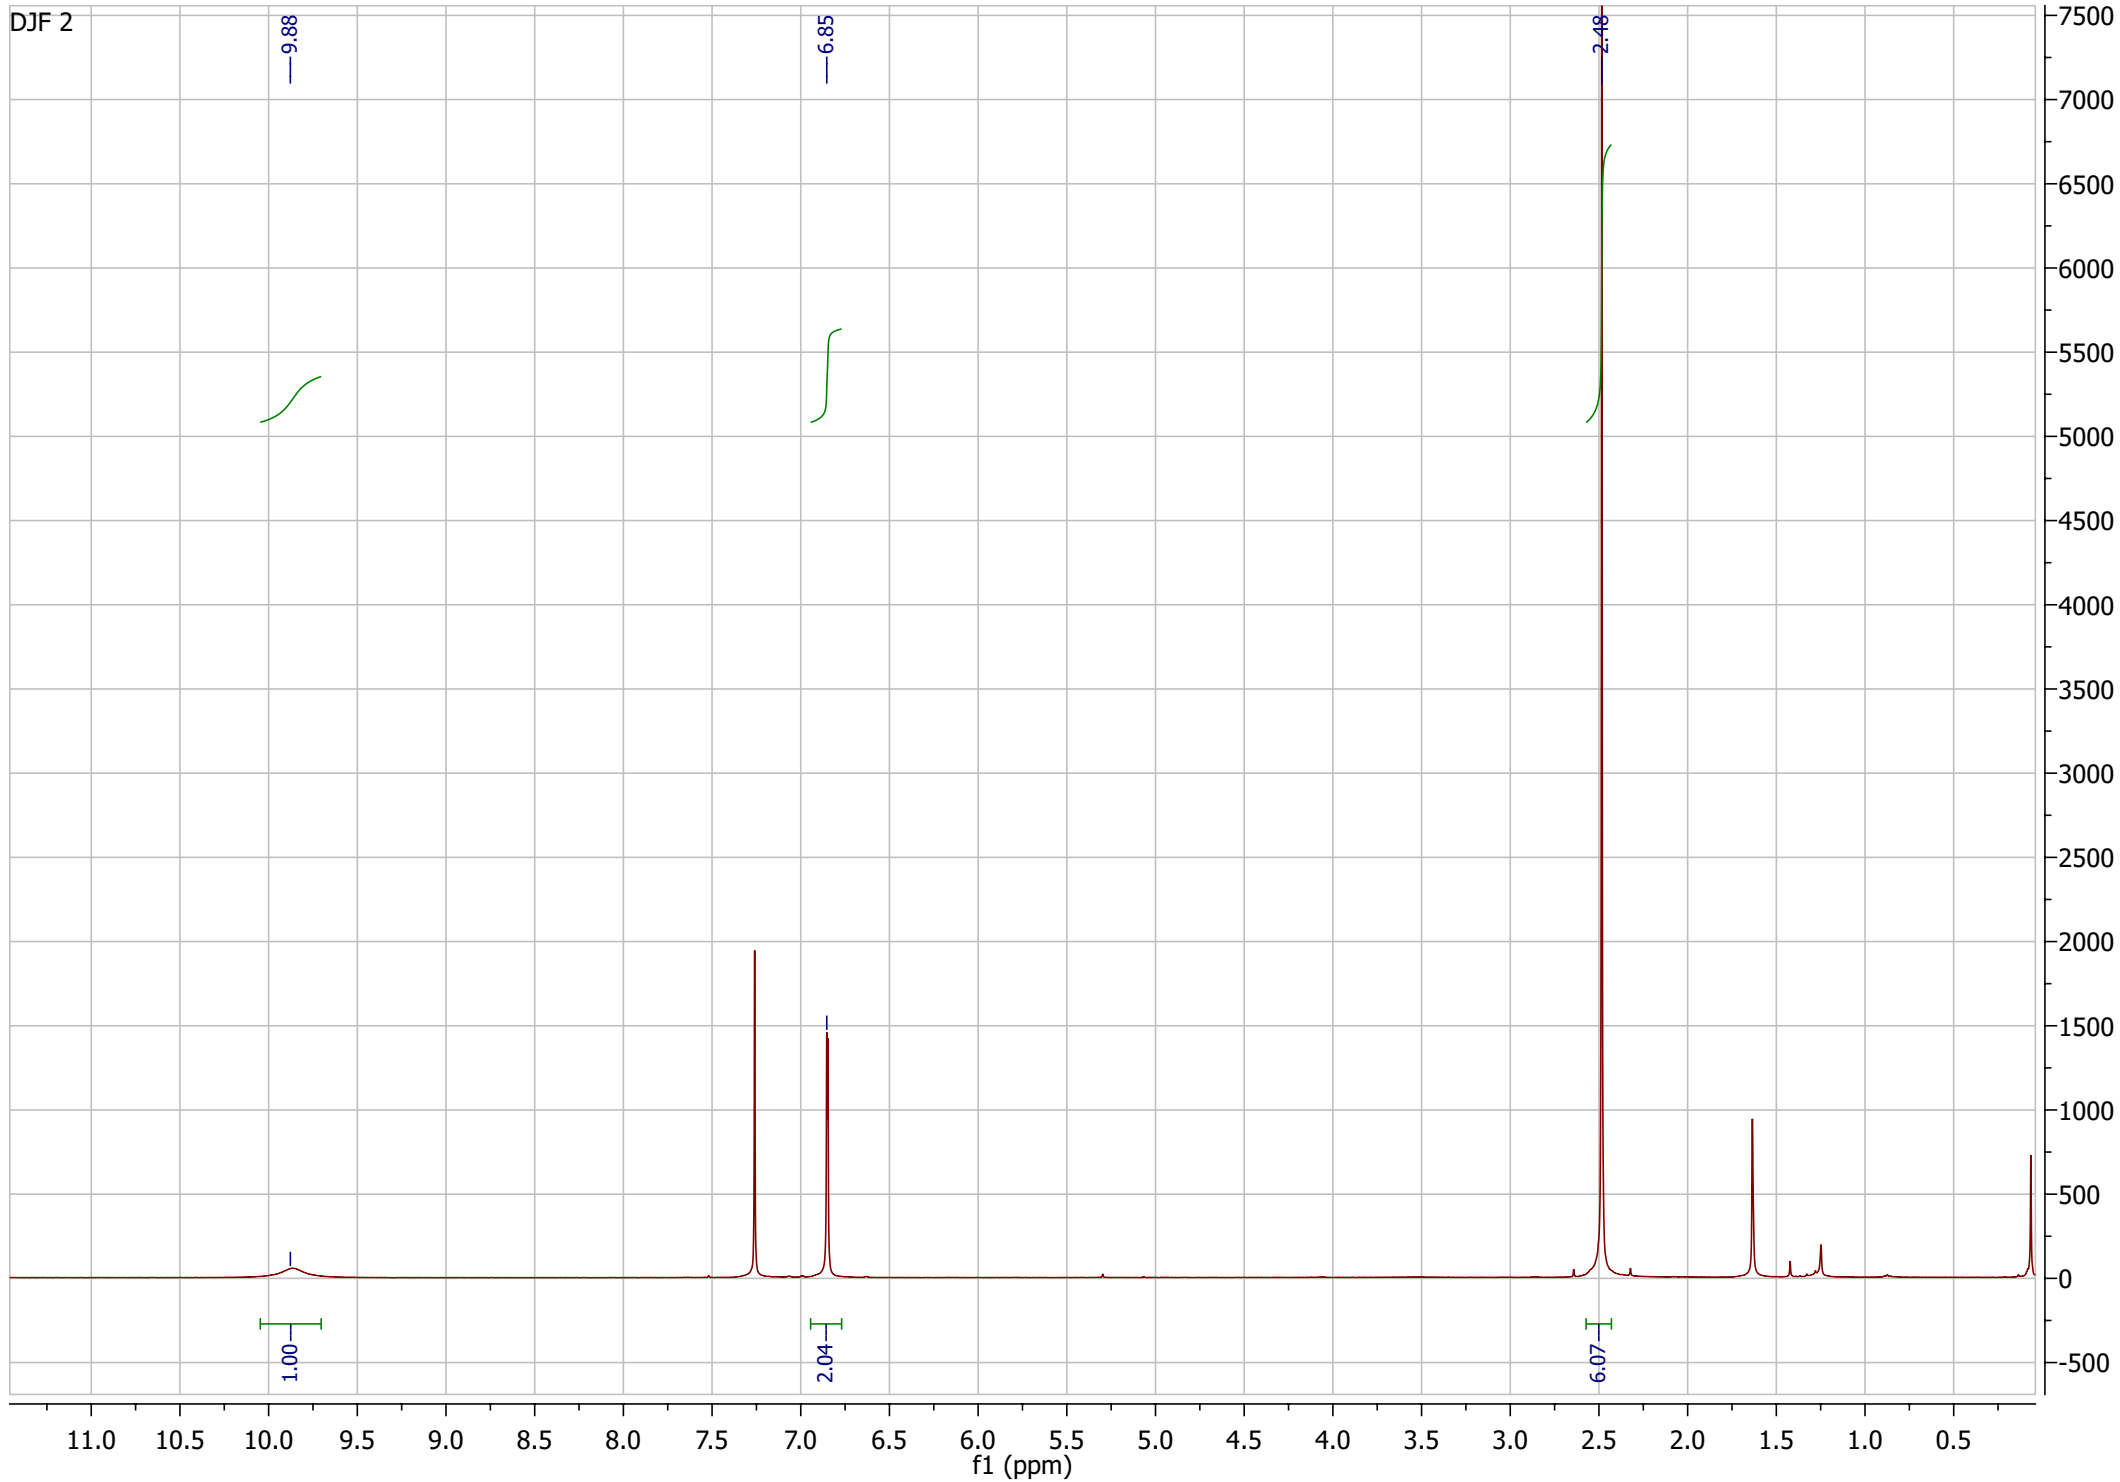

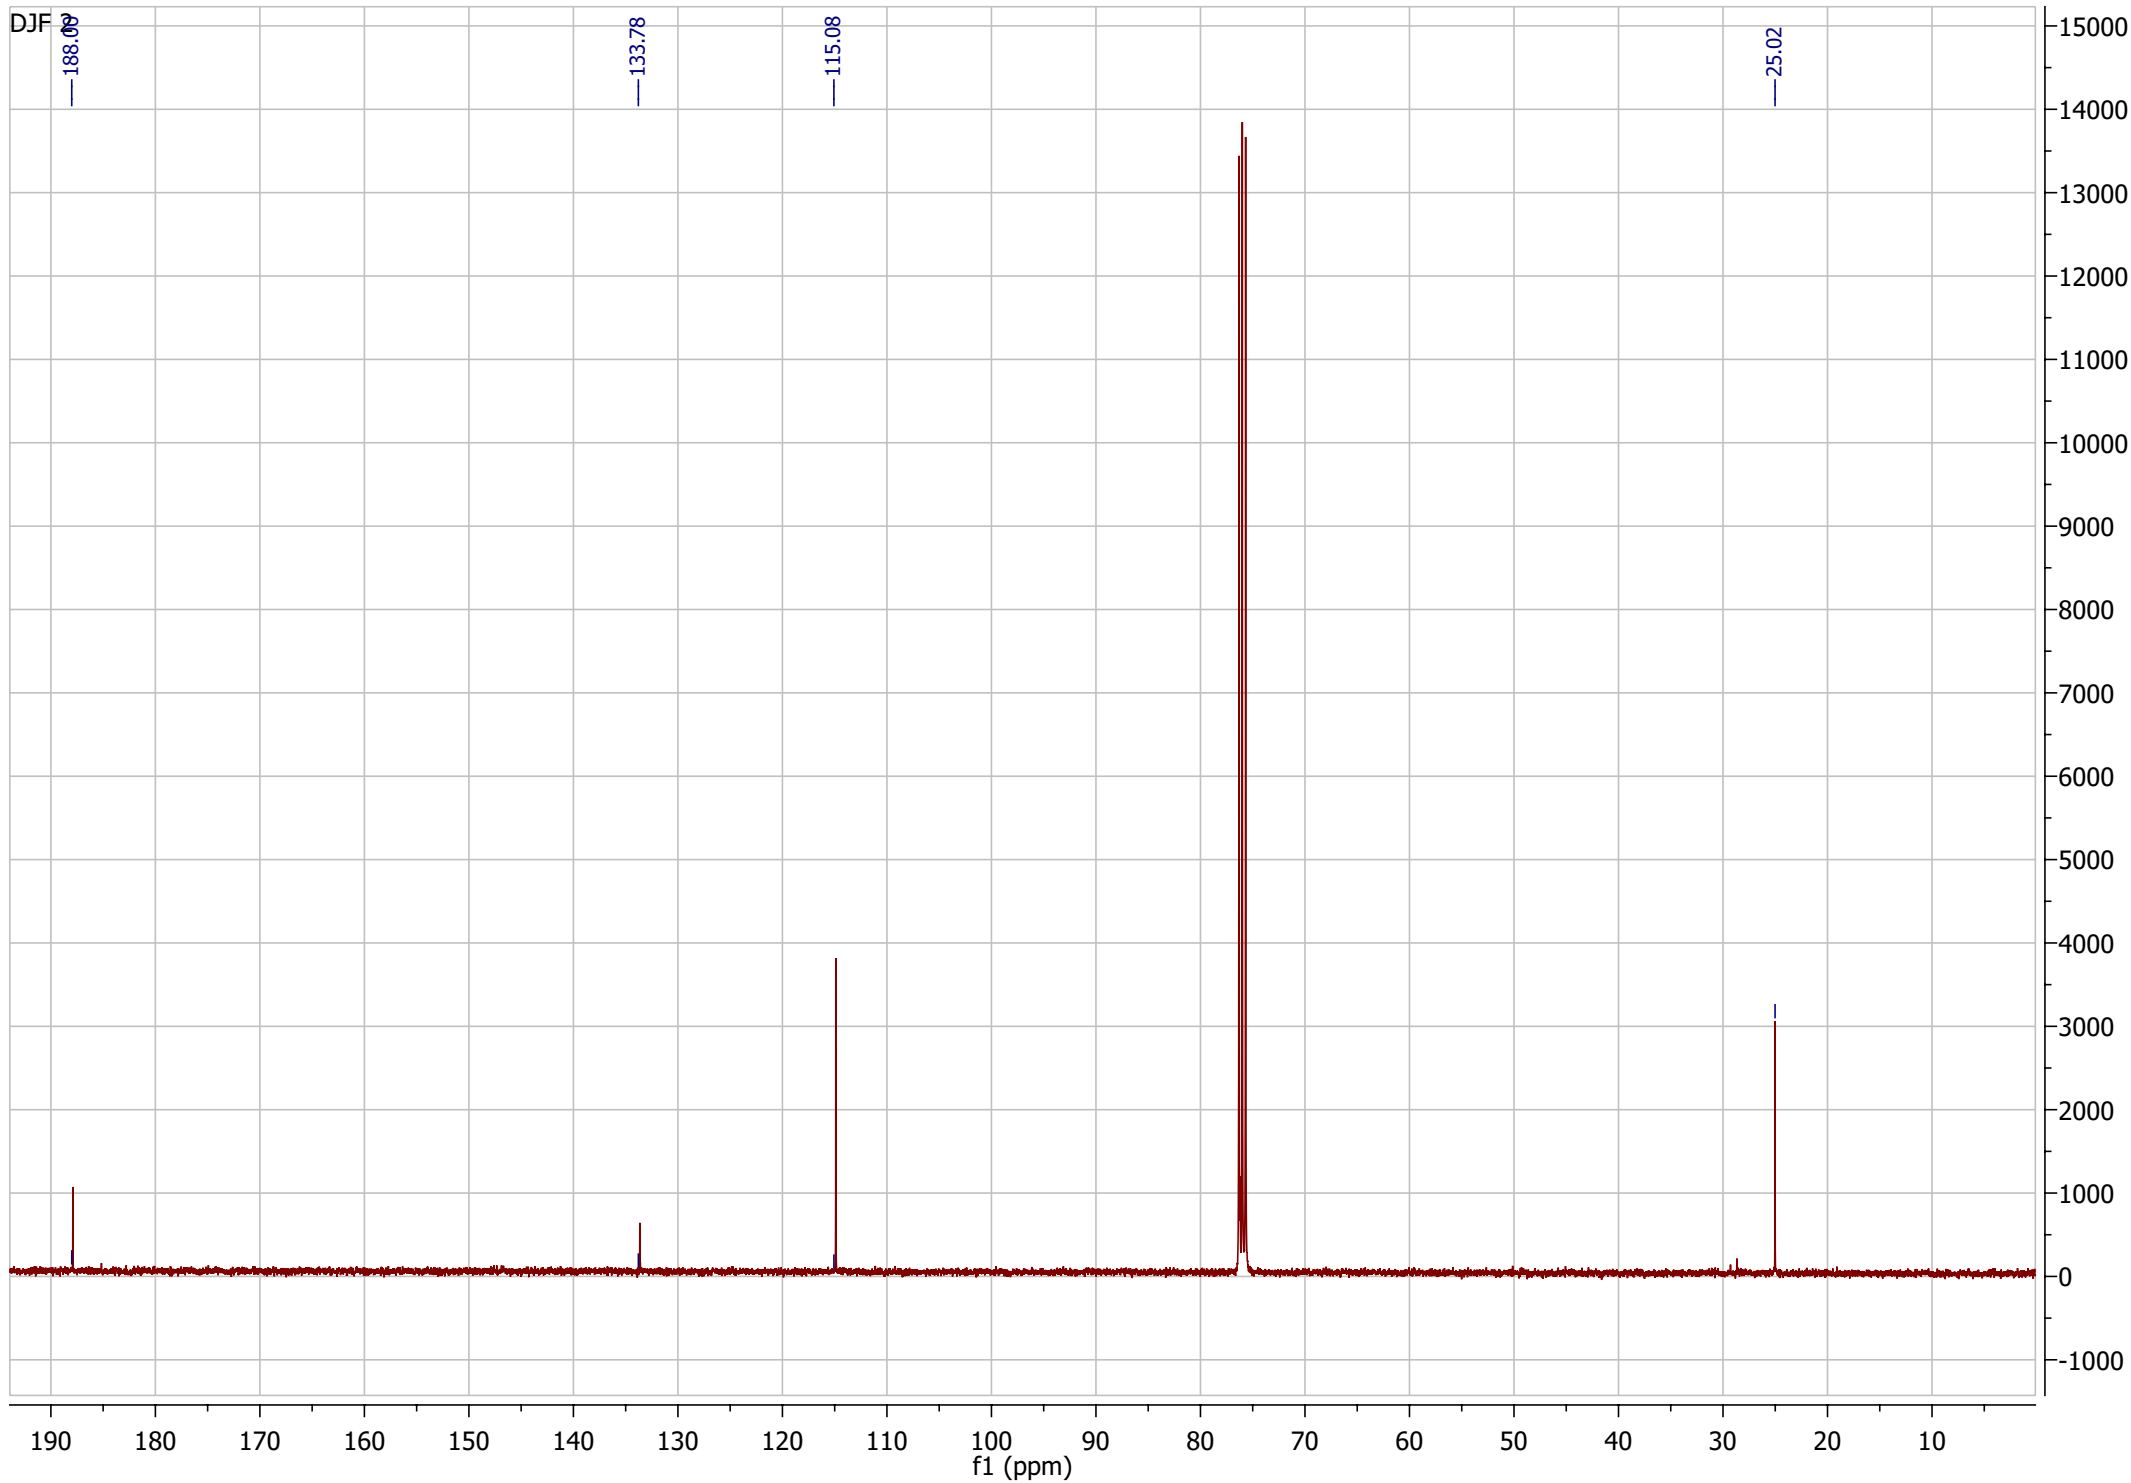

DJF 3

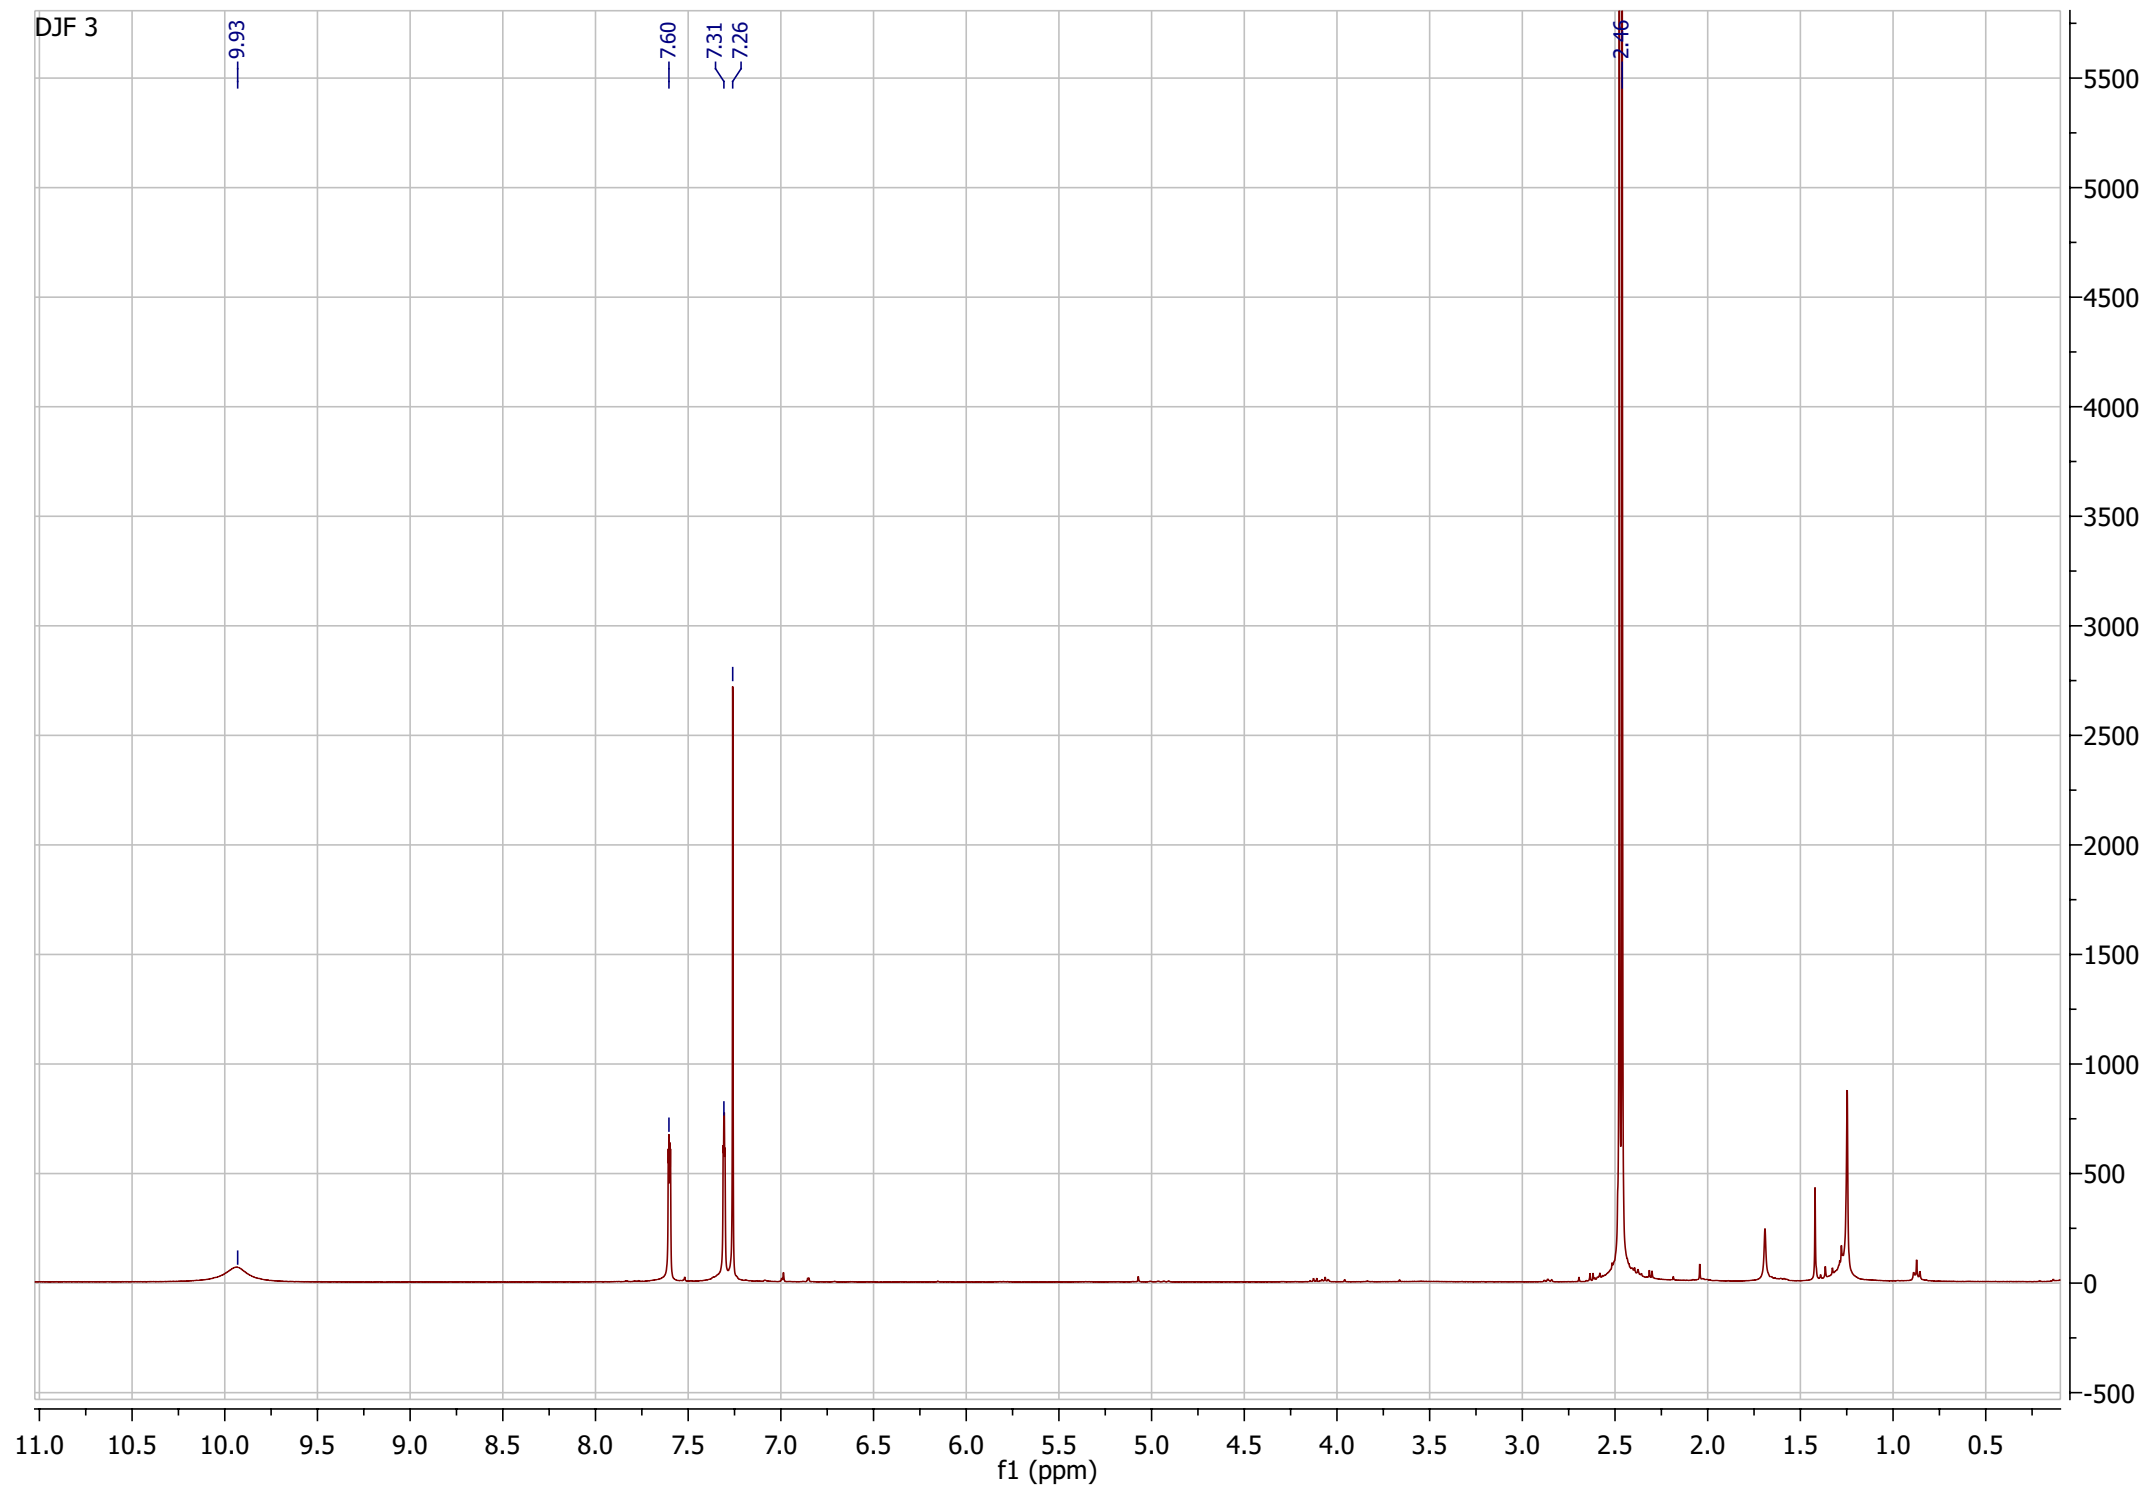

DJF 3B

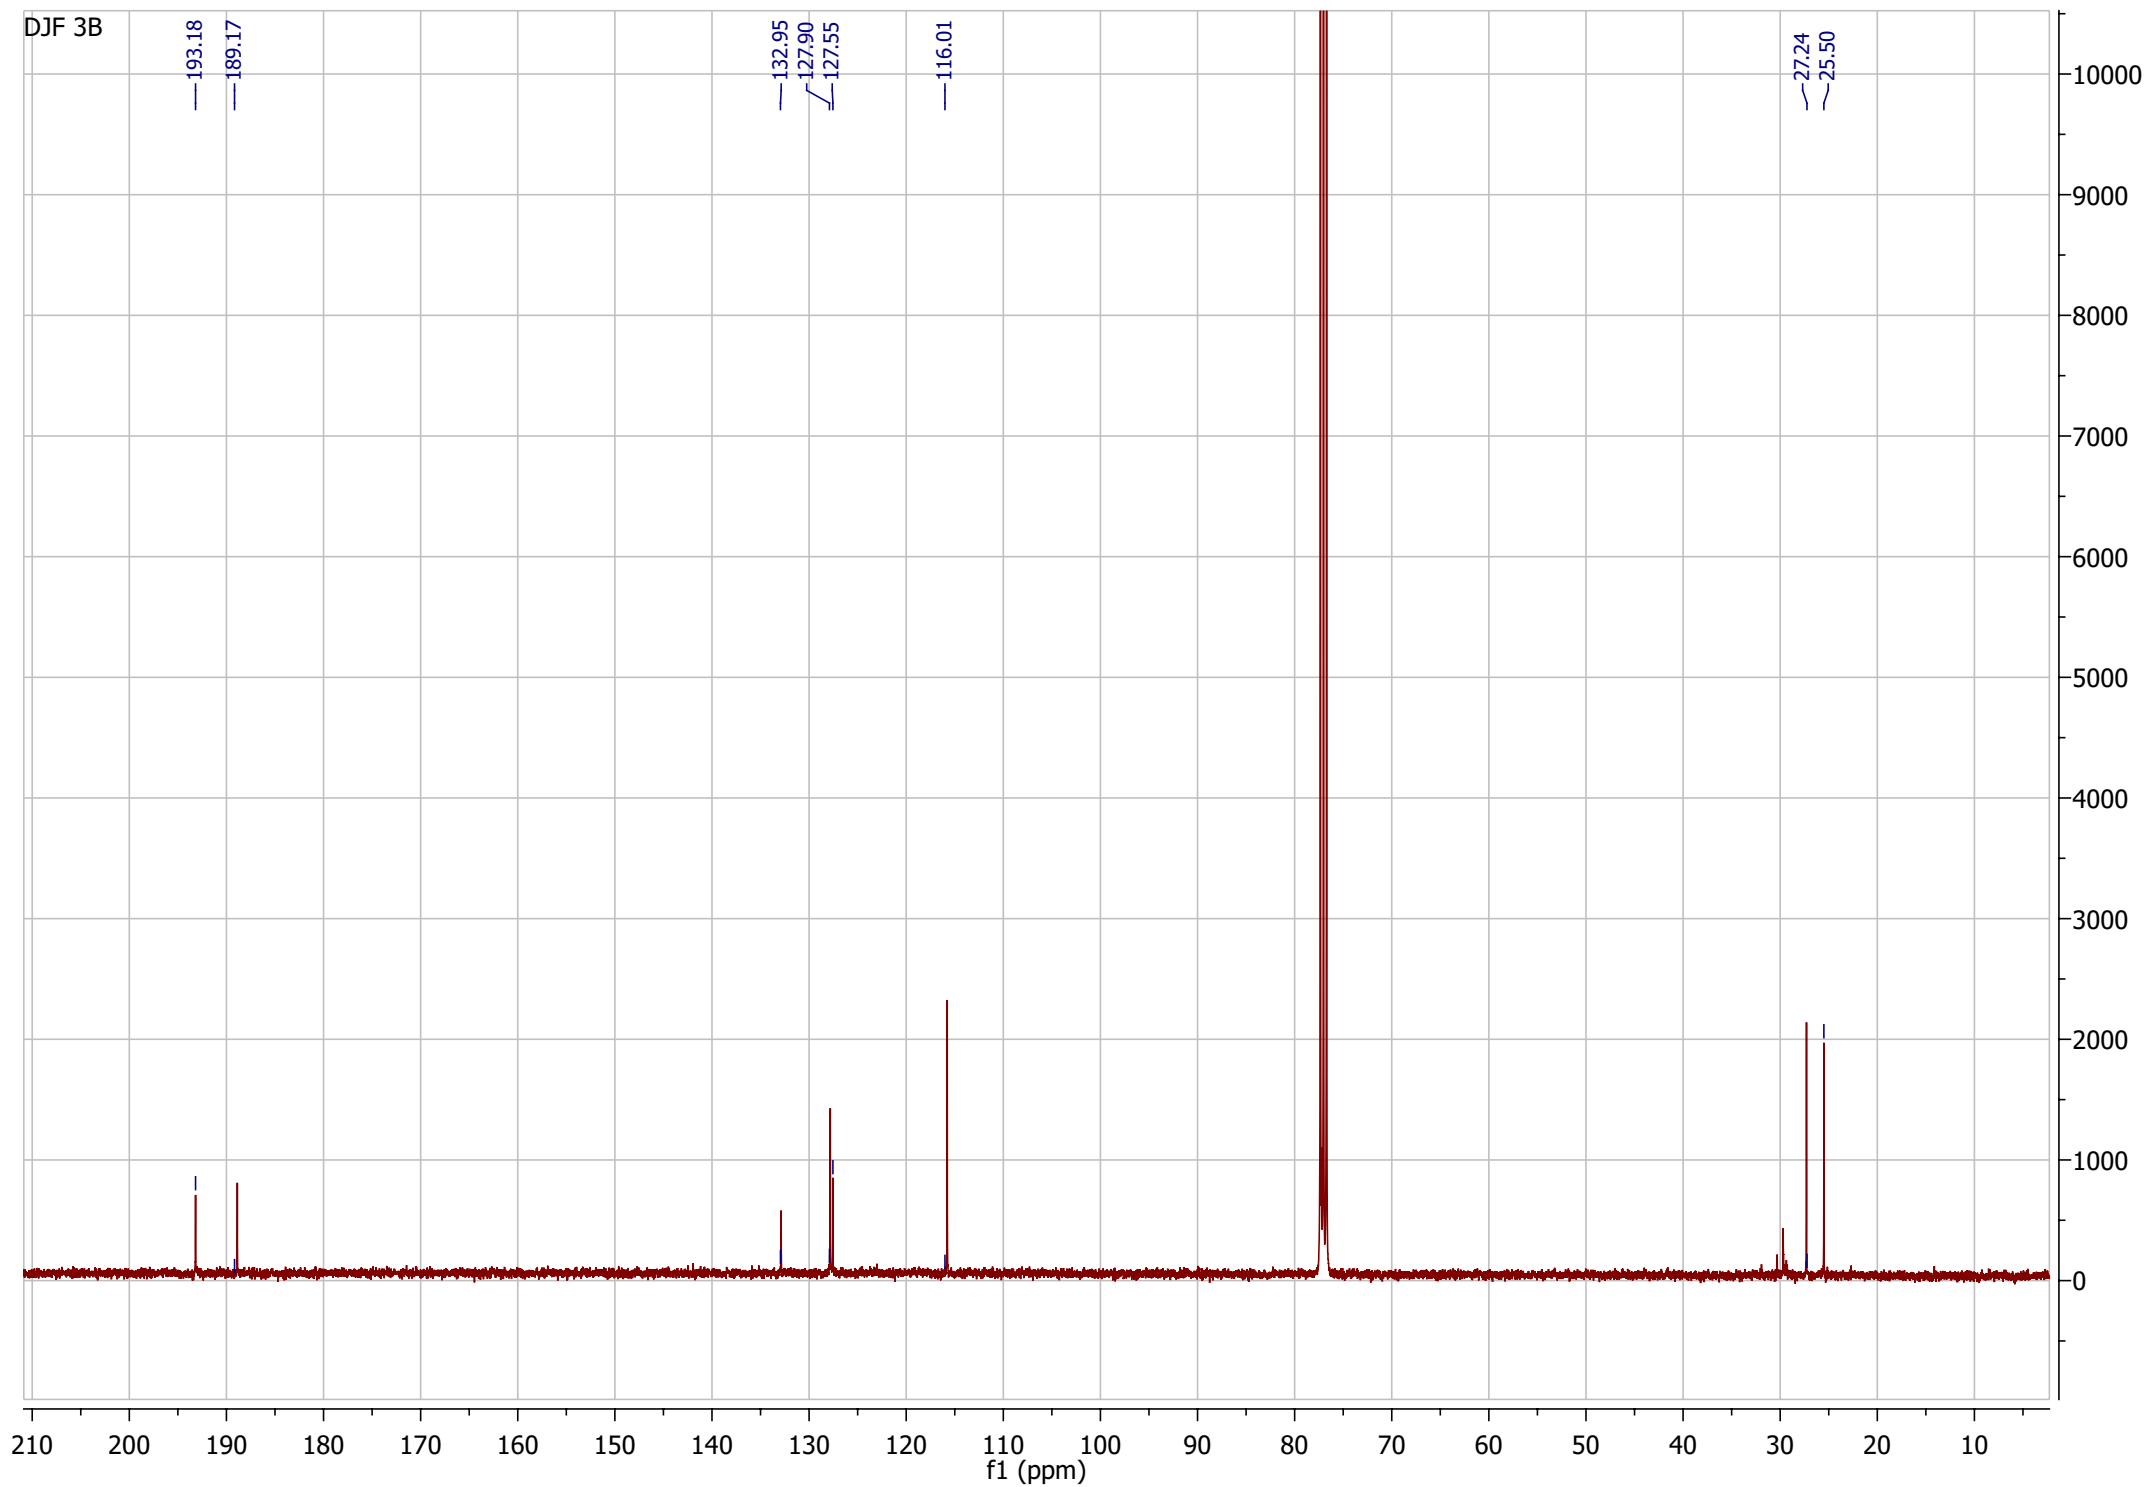

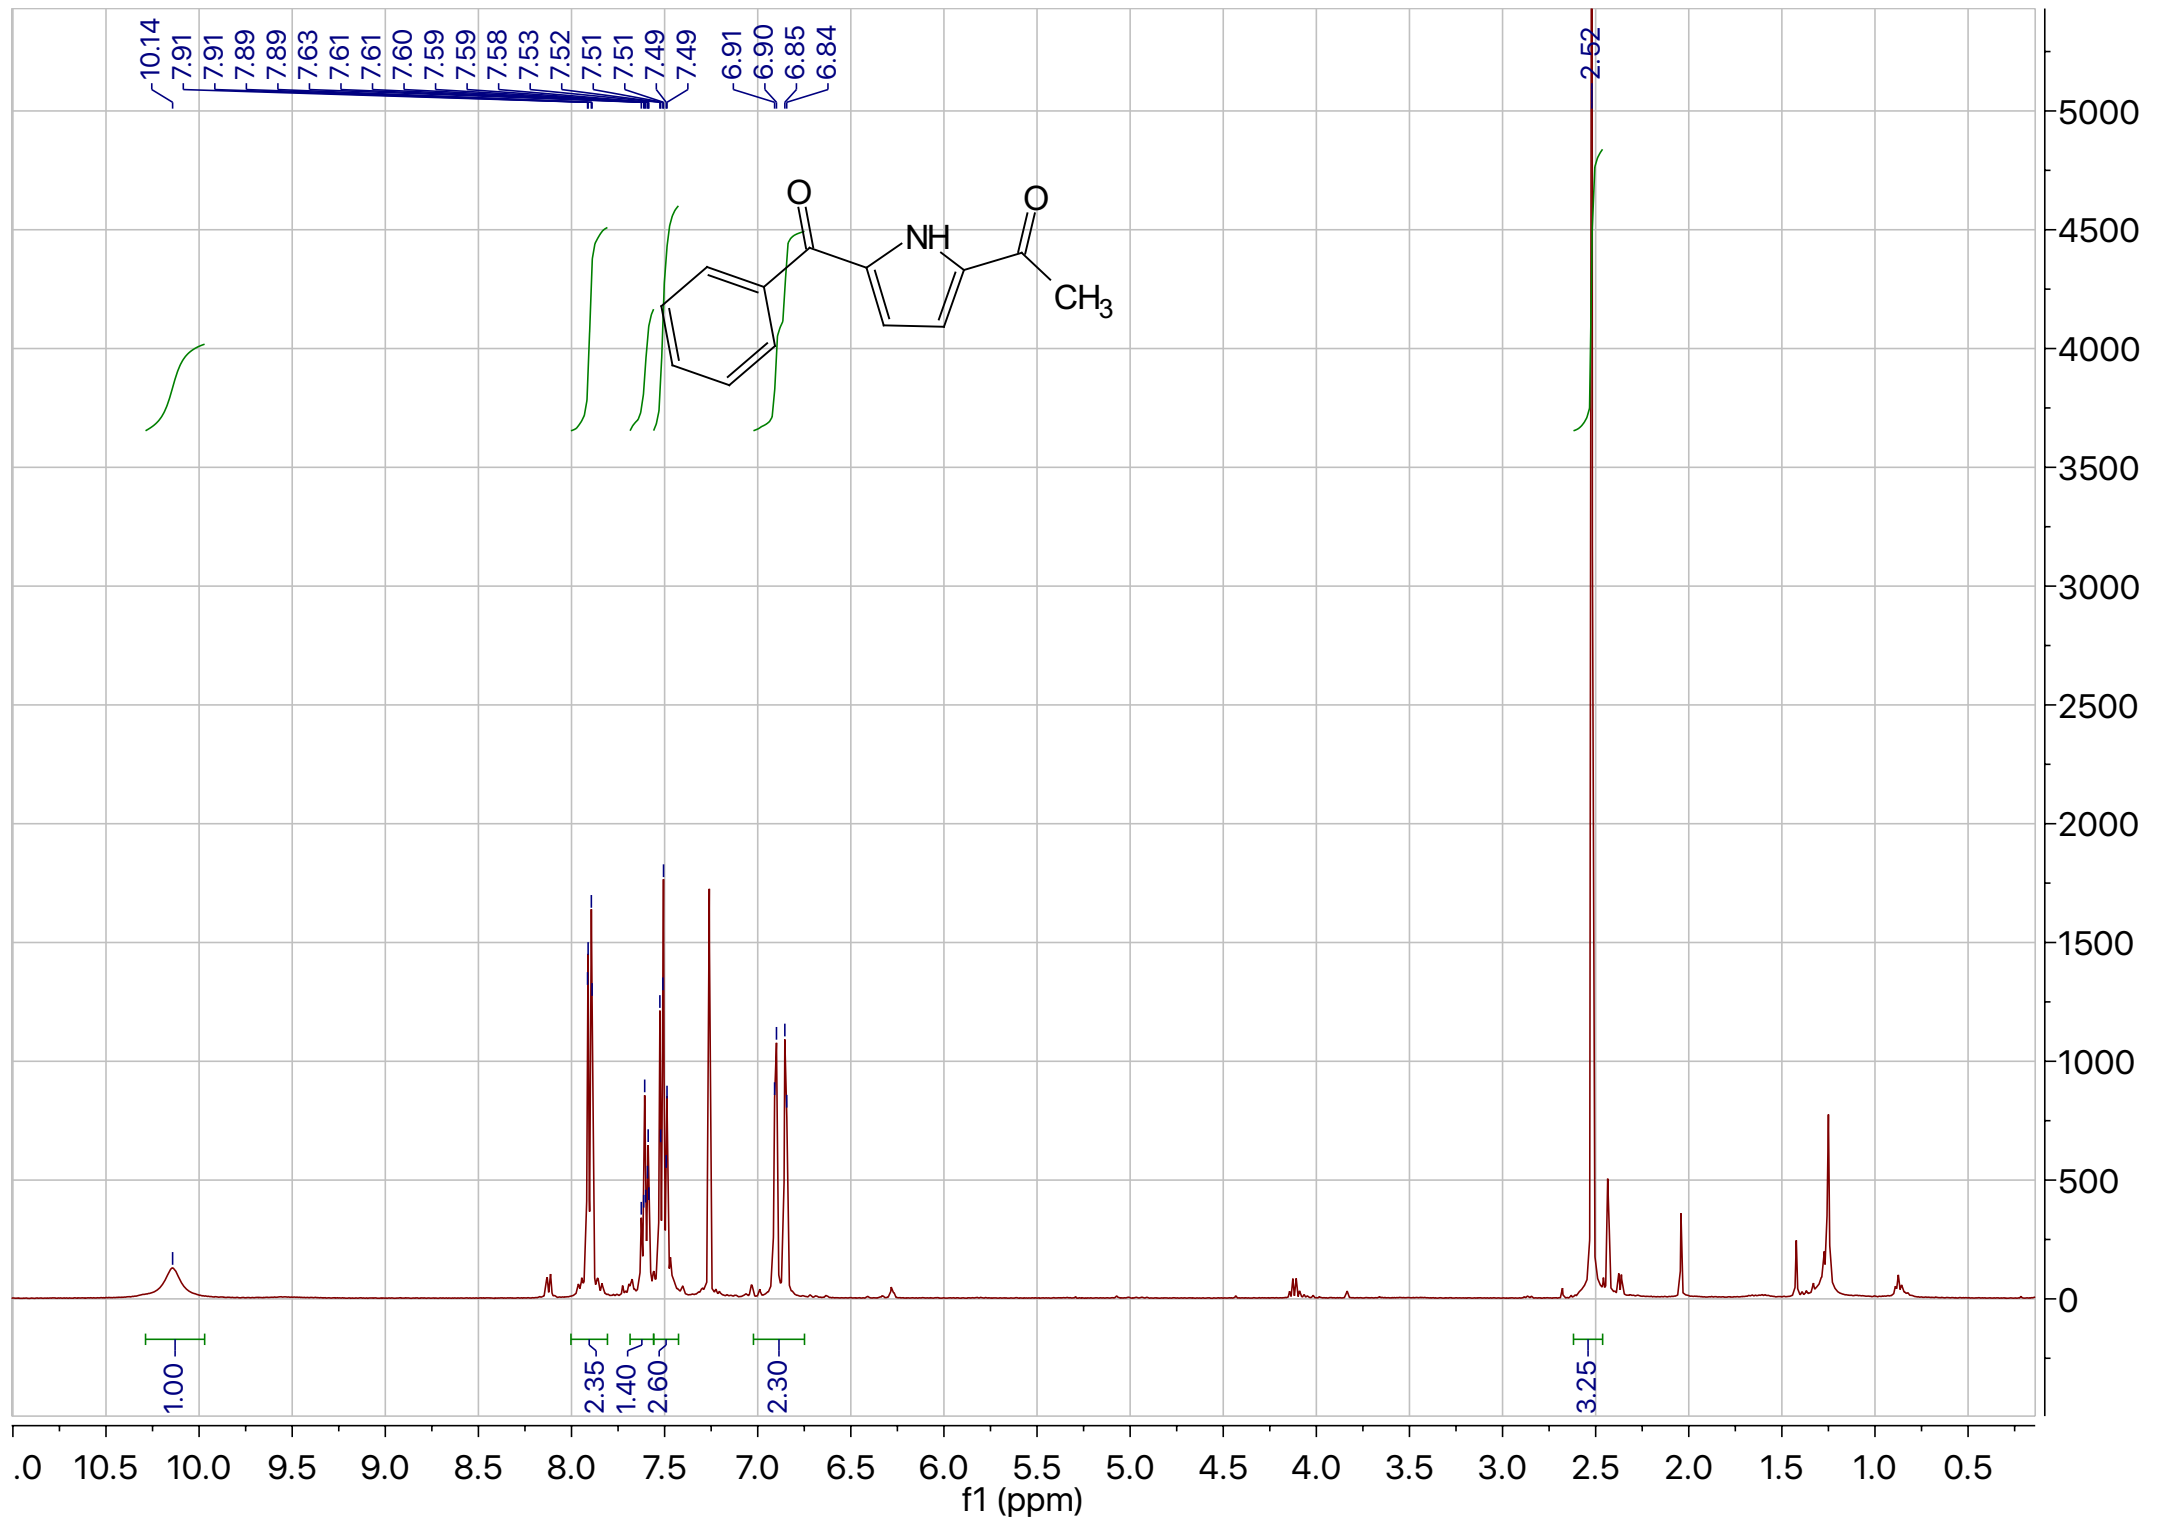

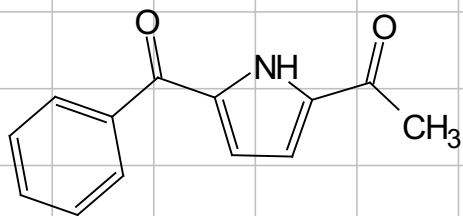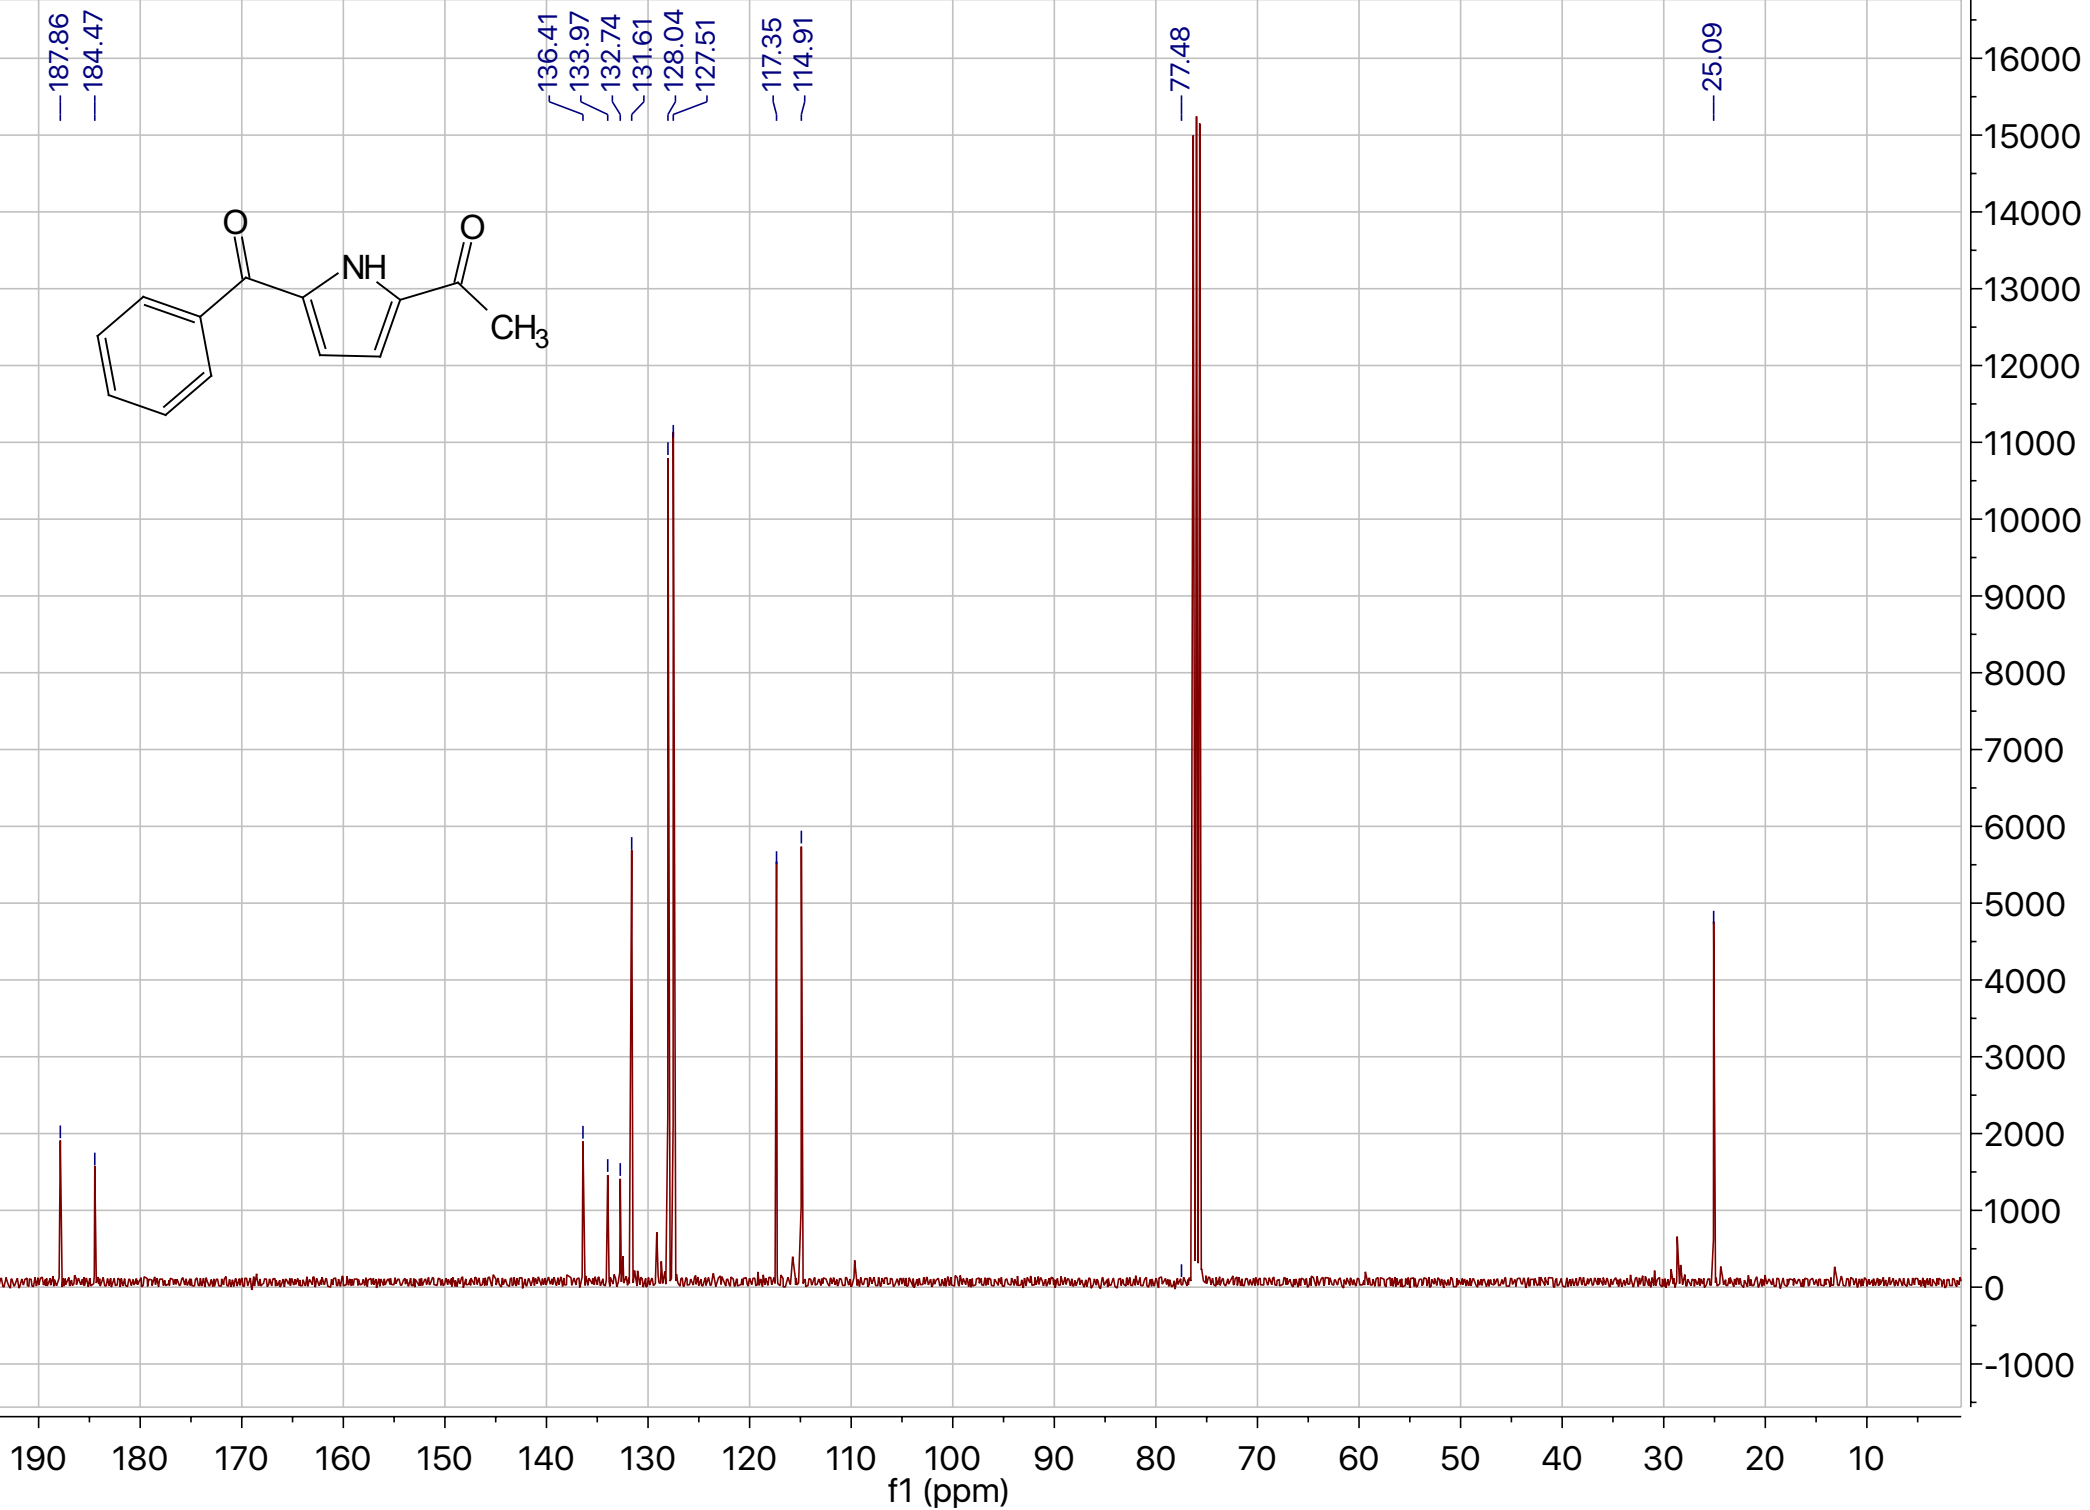

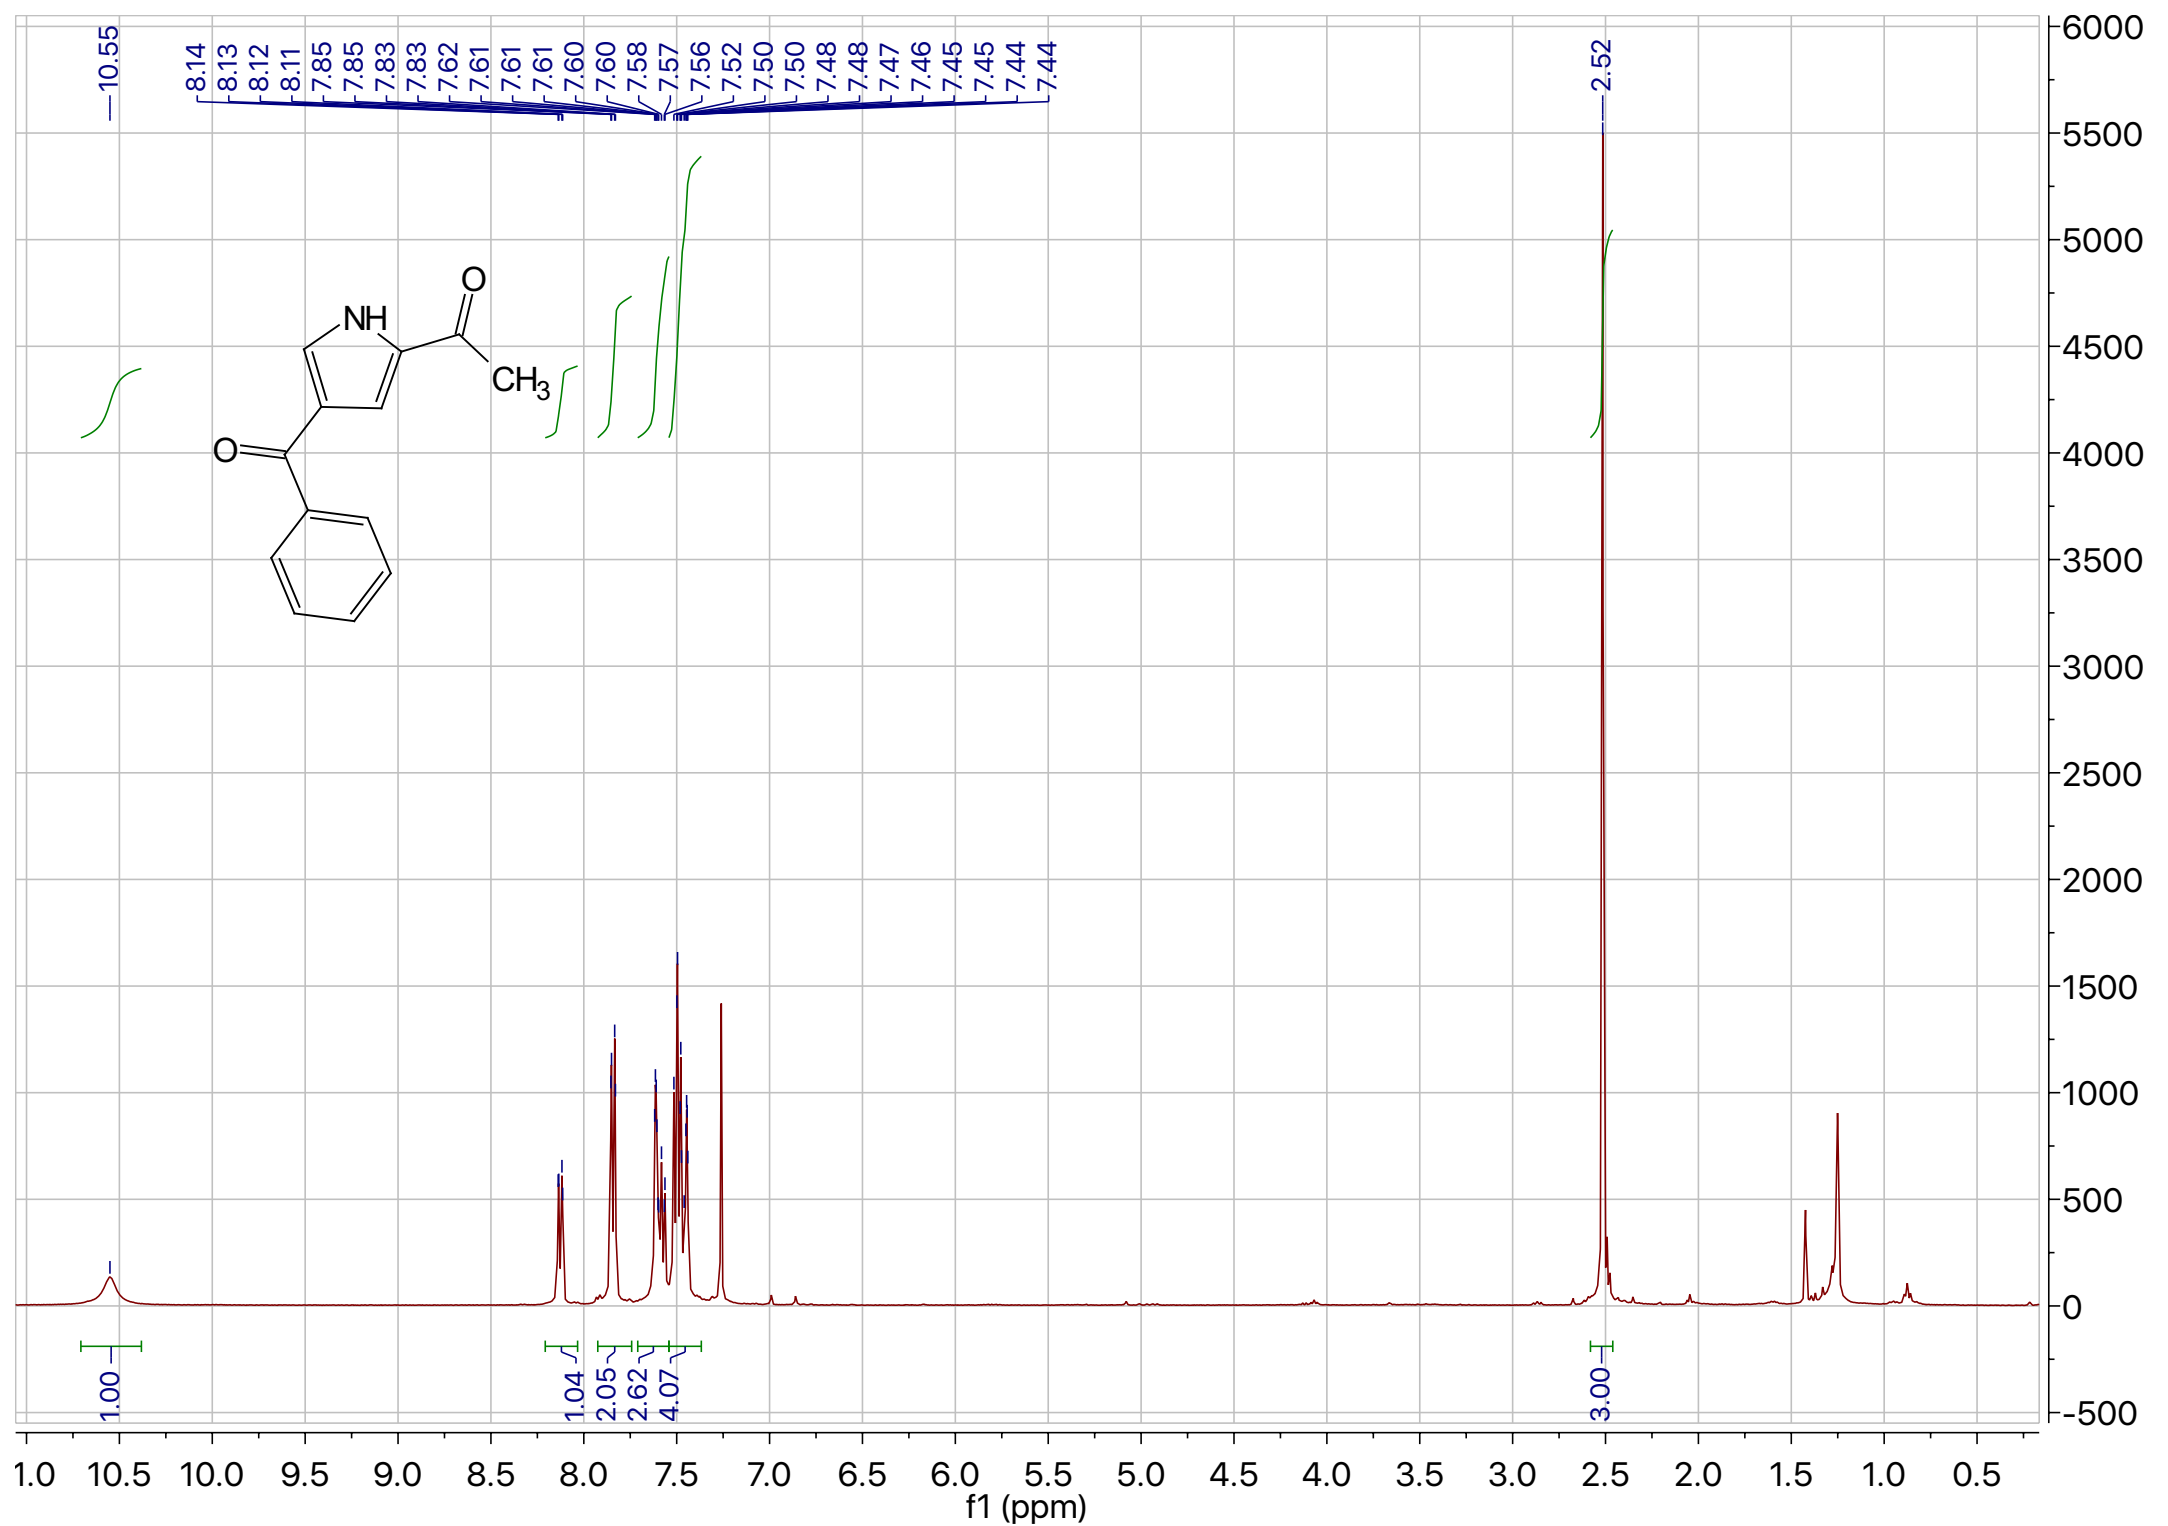



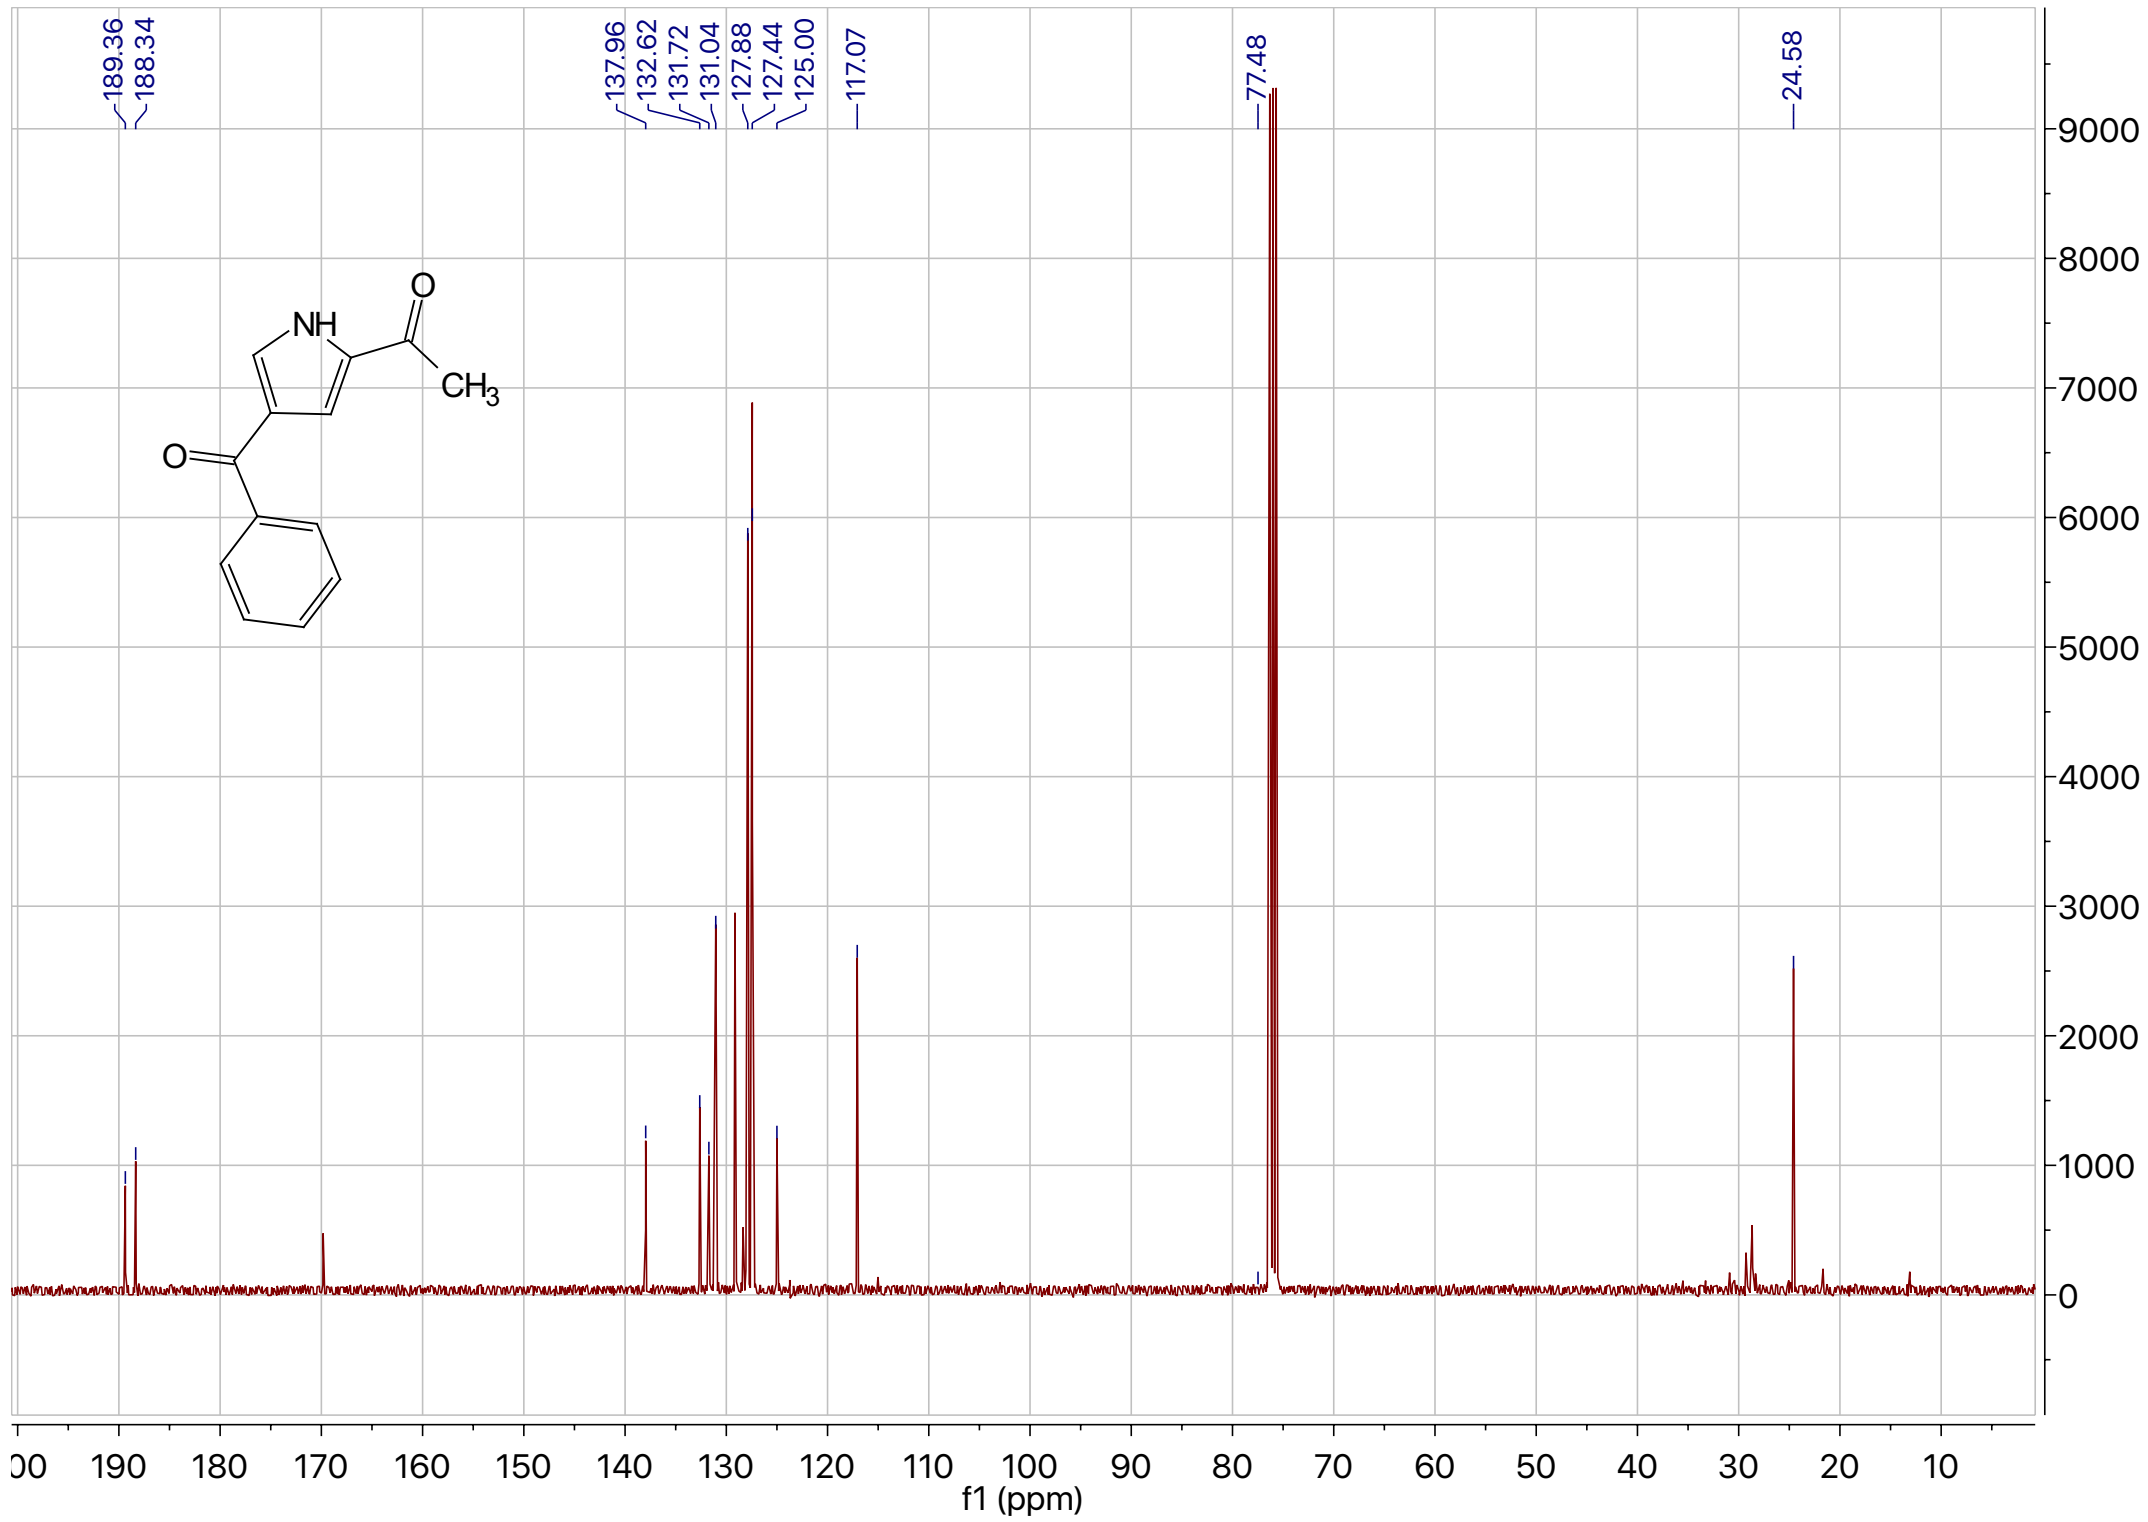

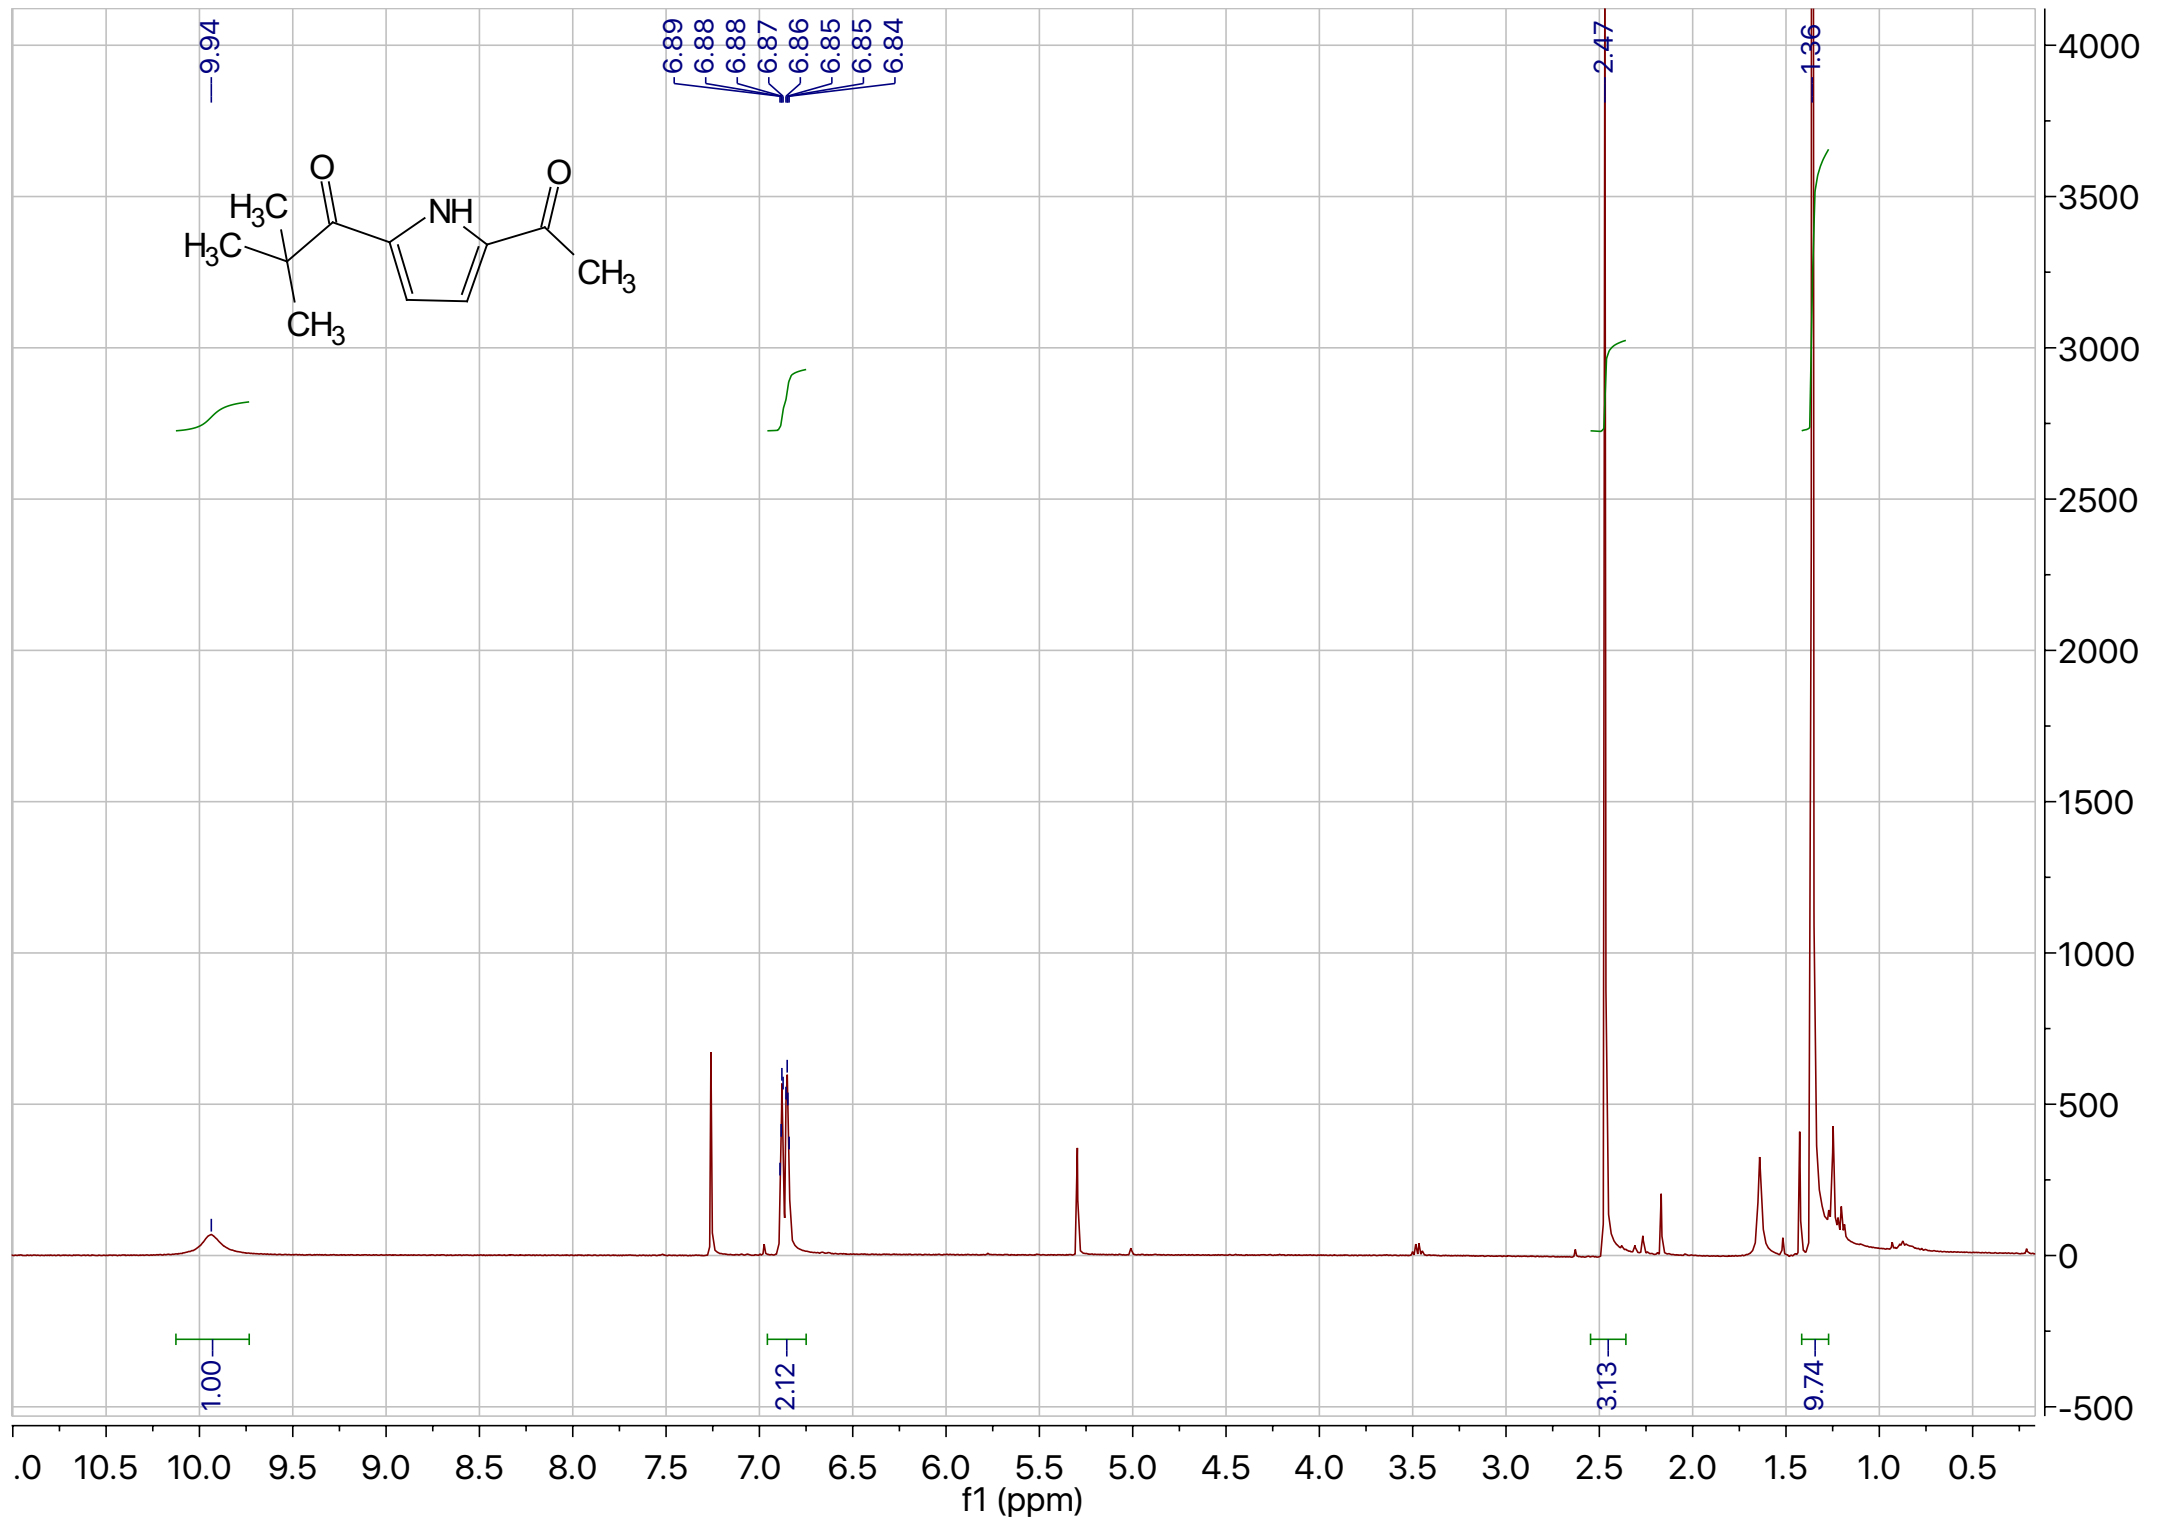

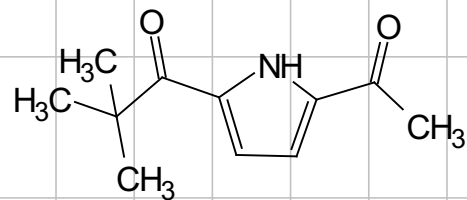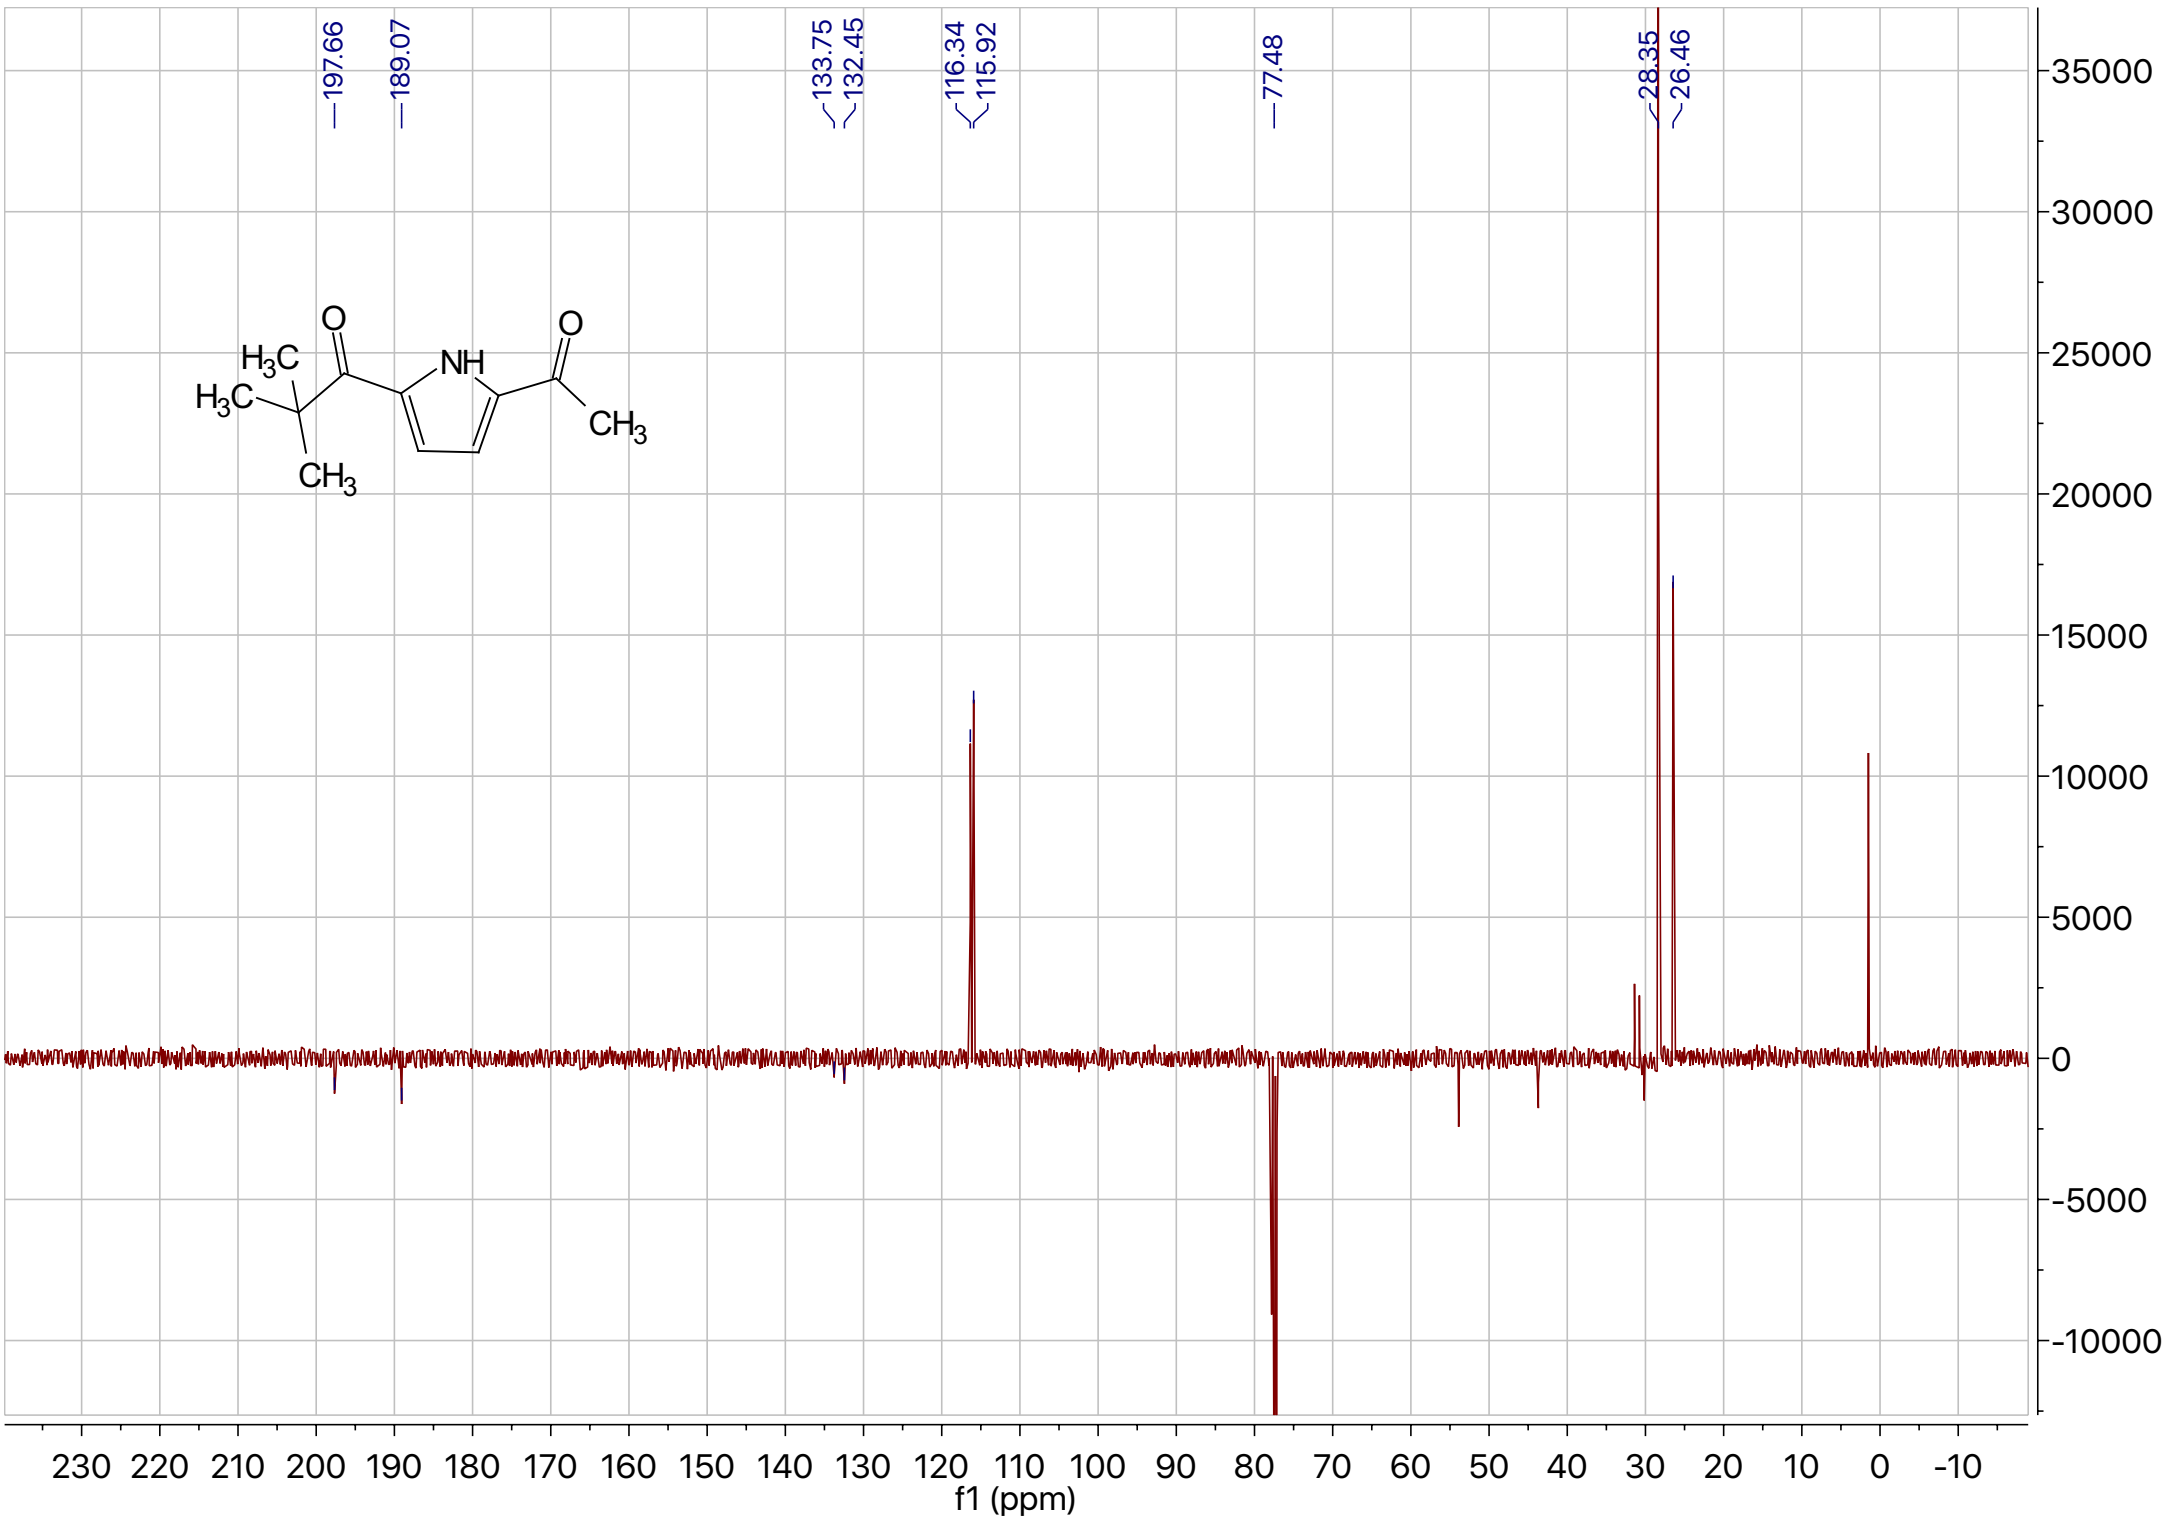

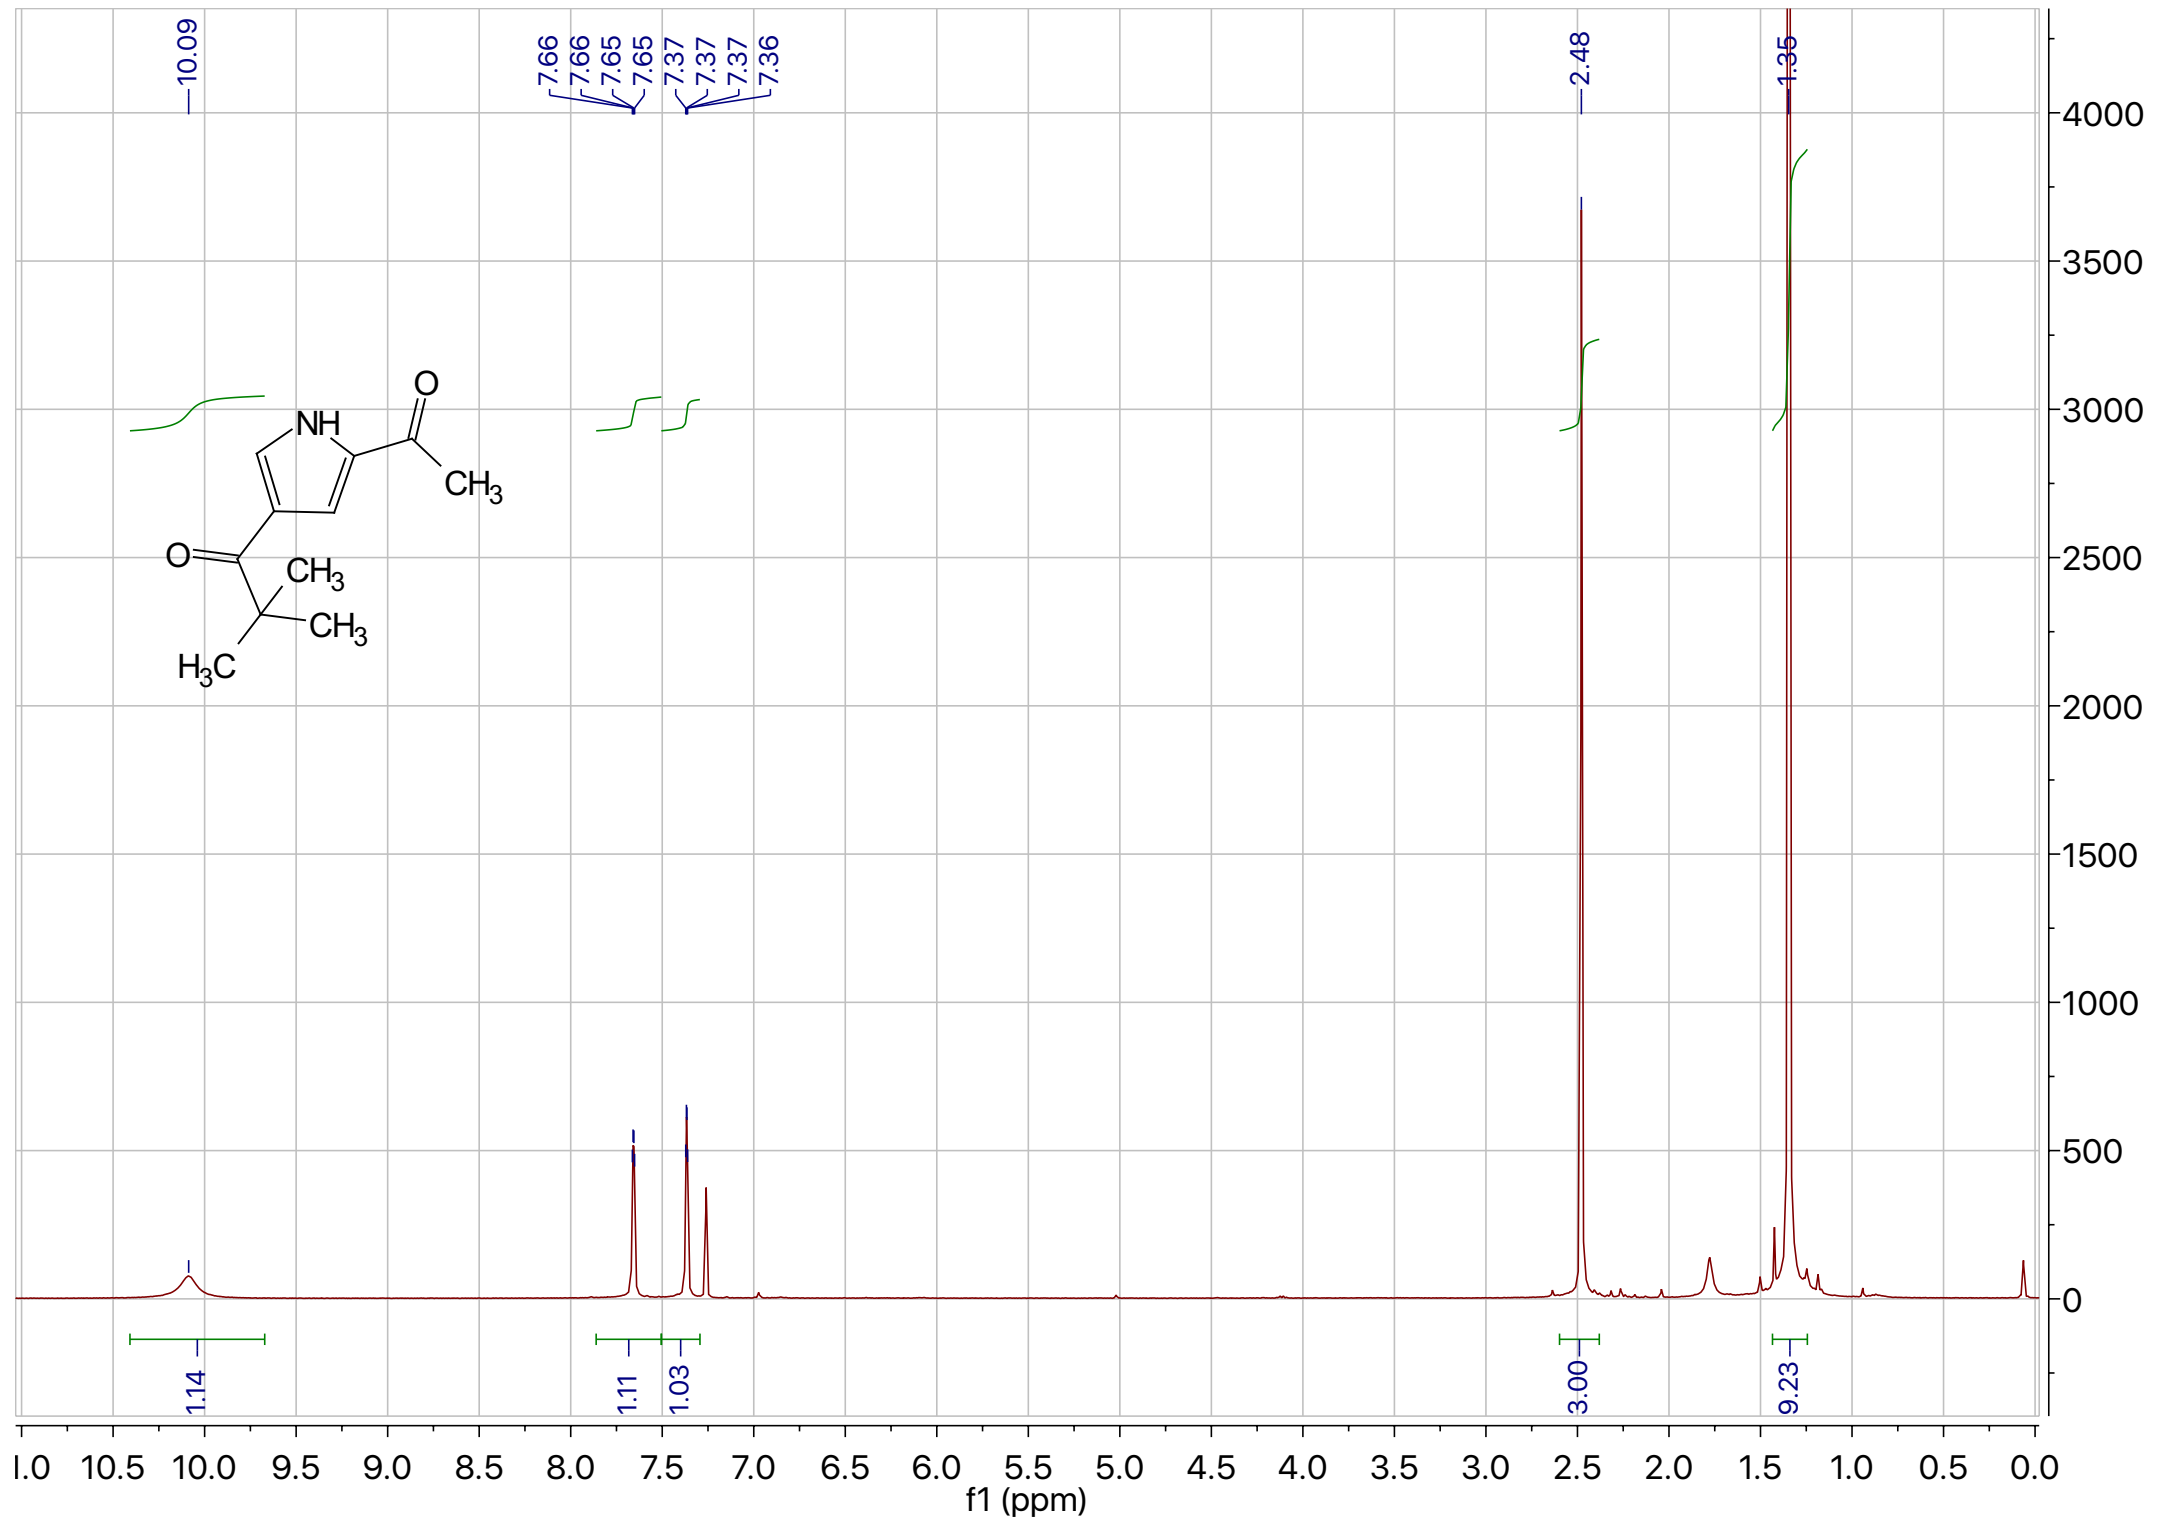

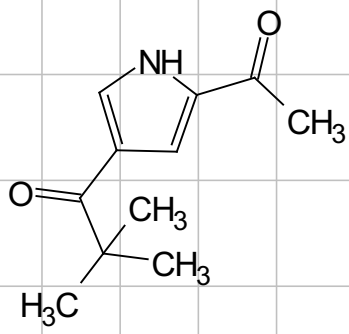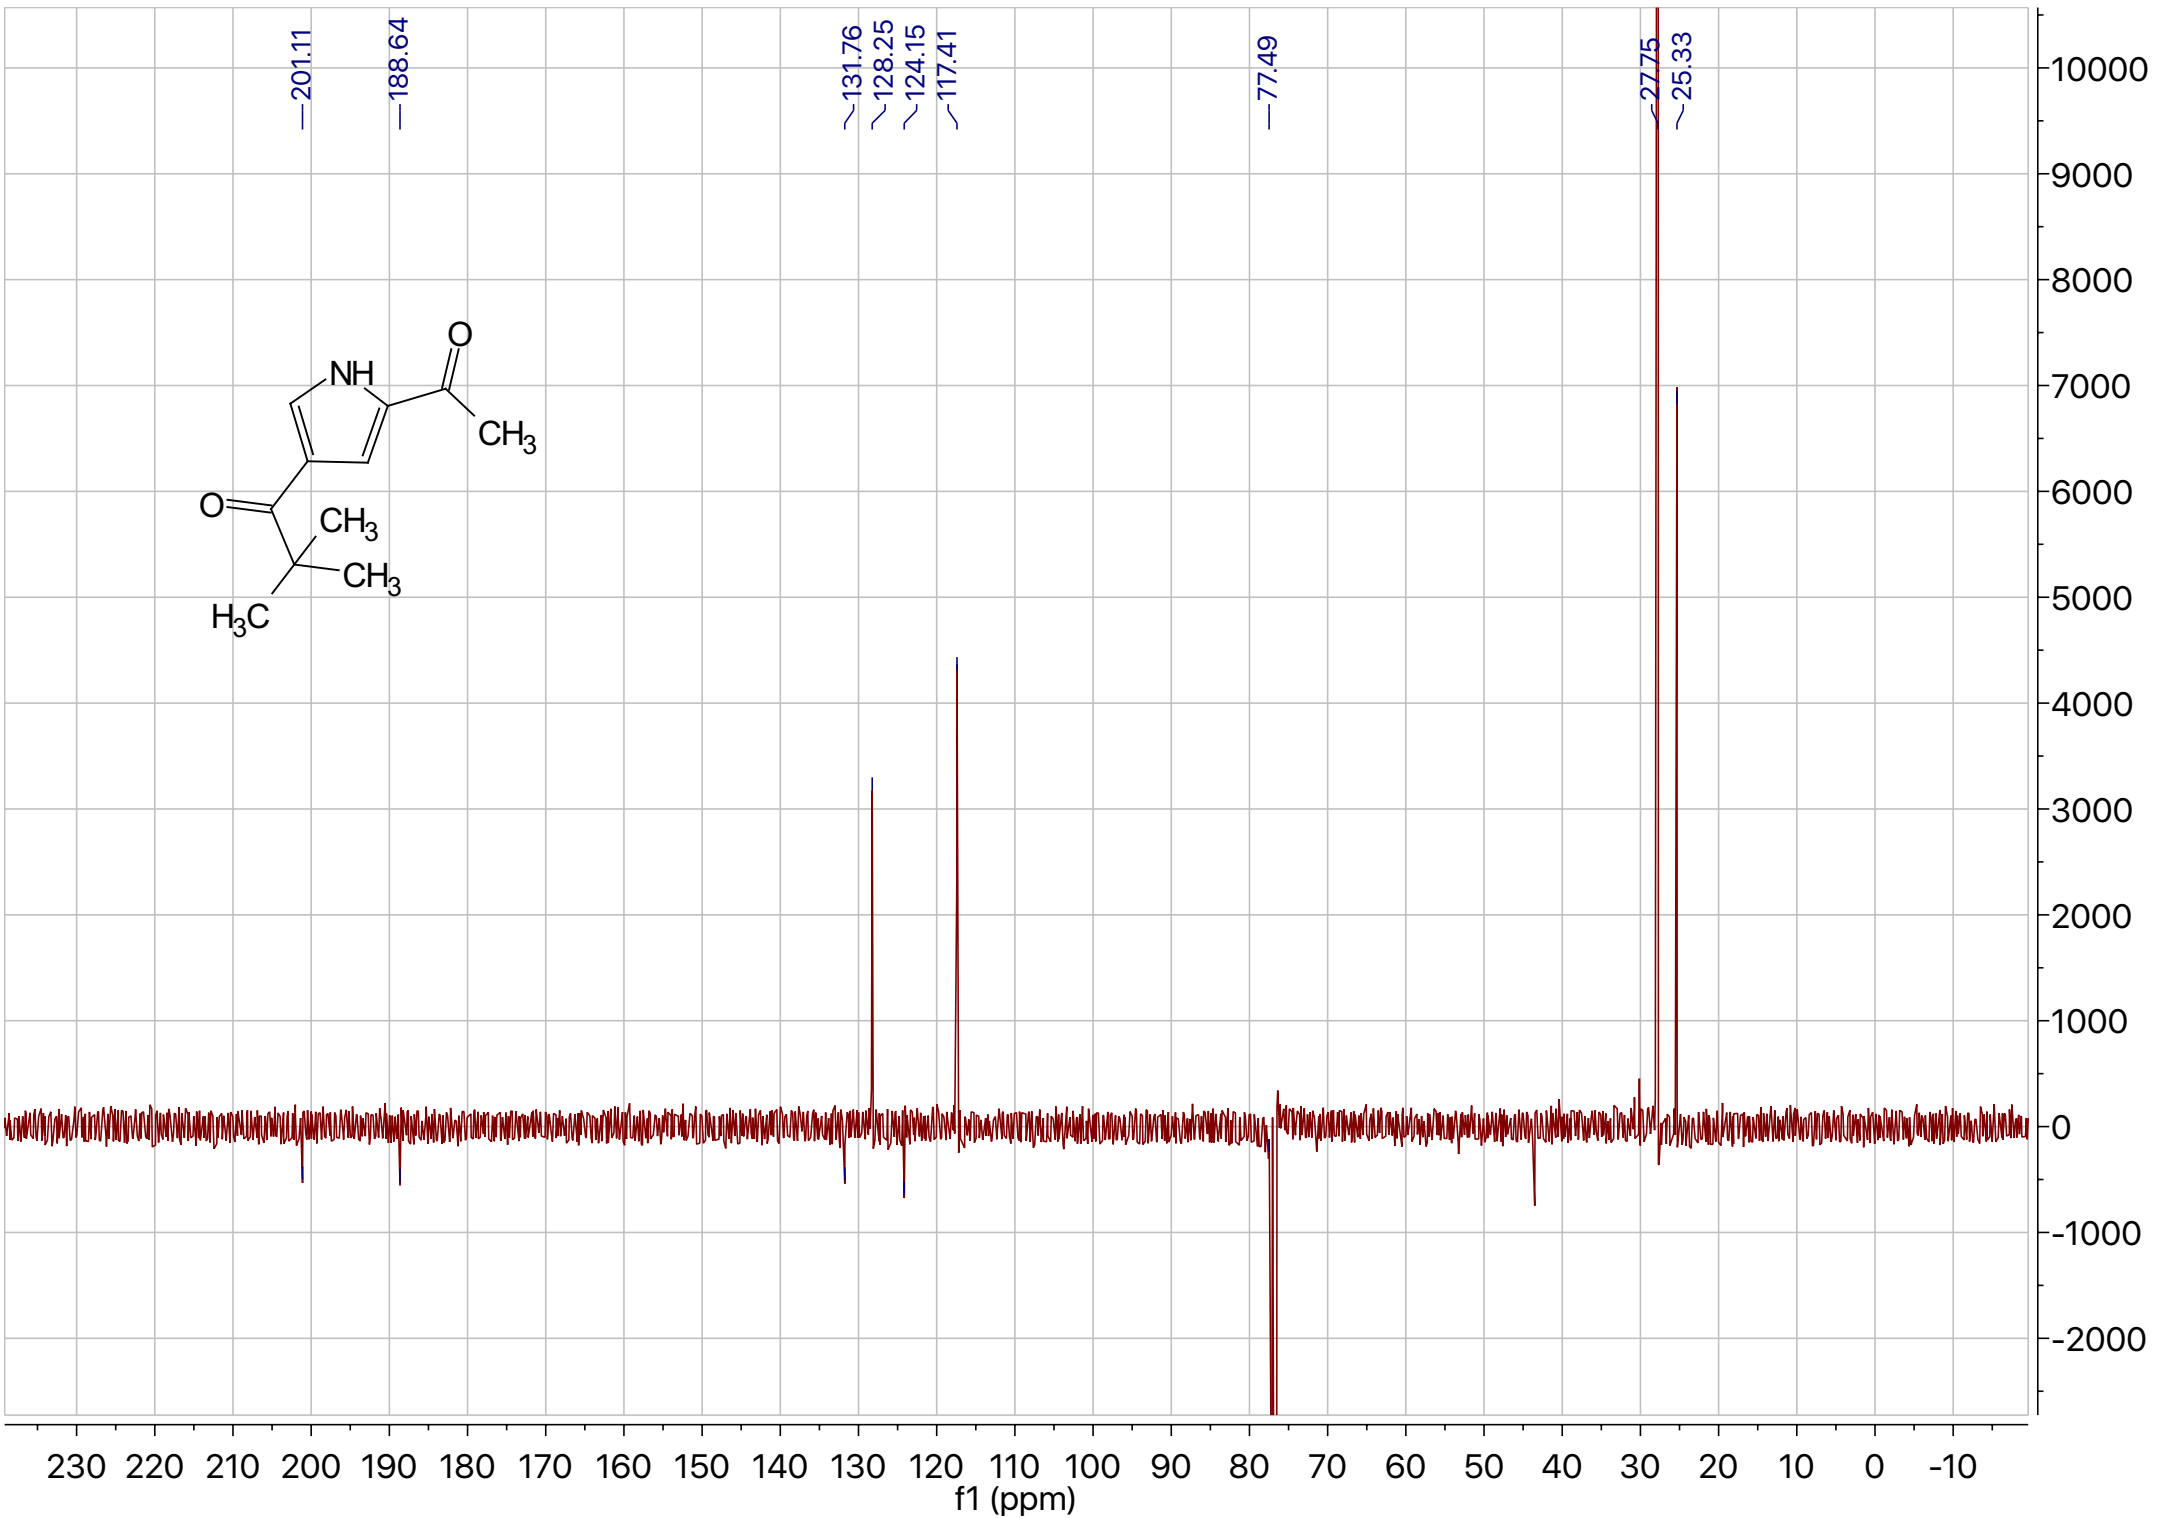

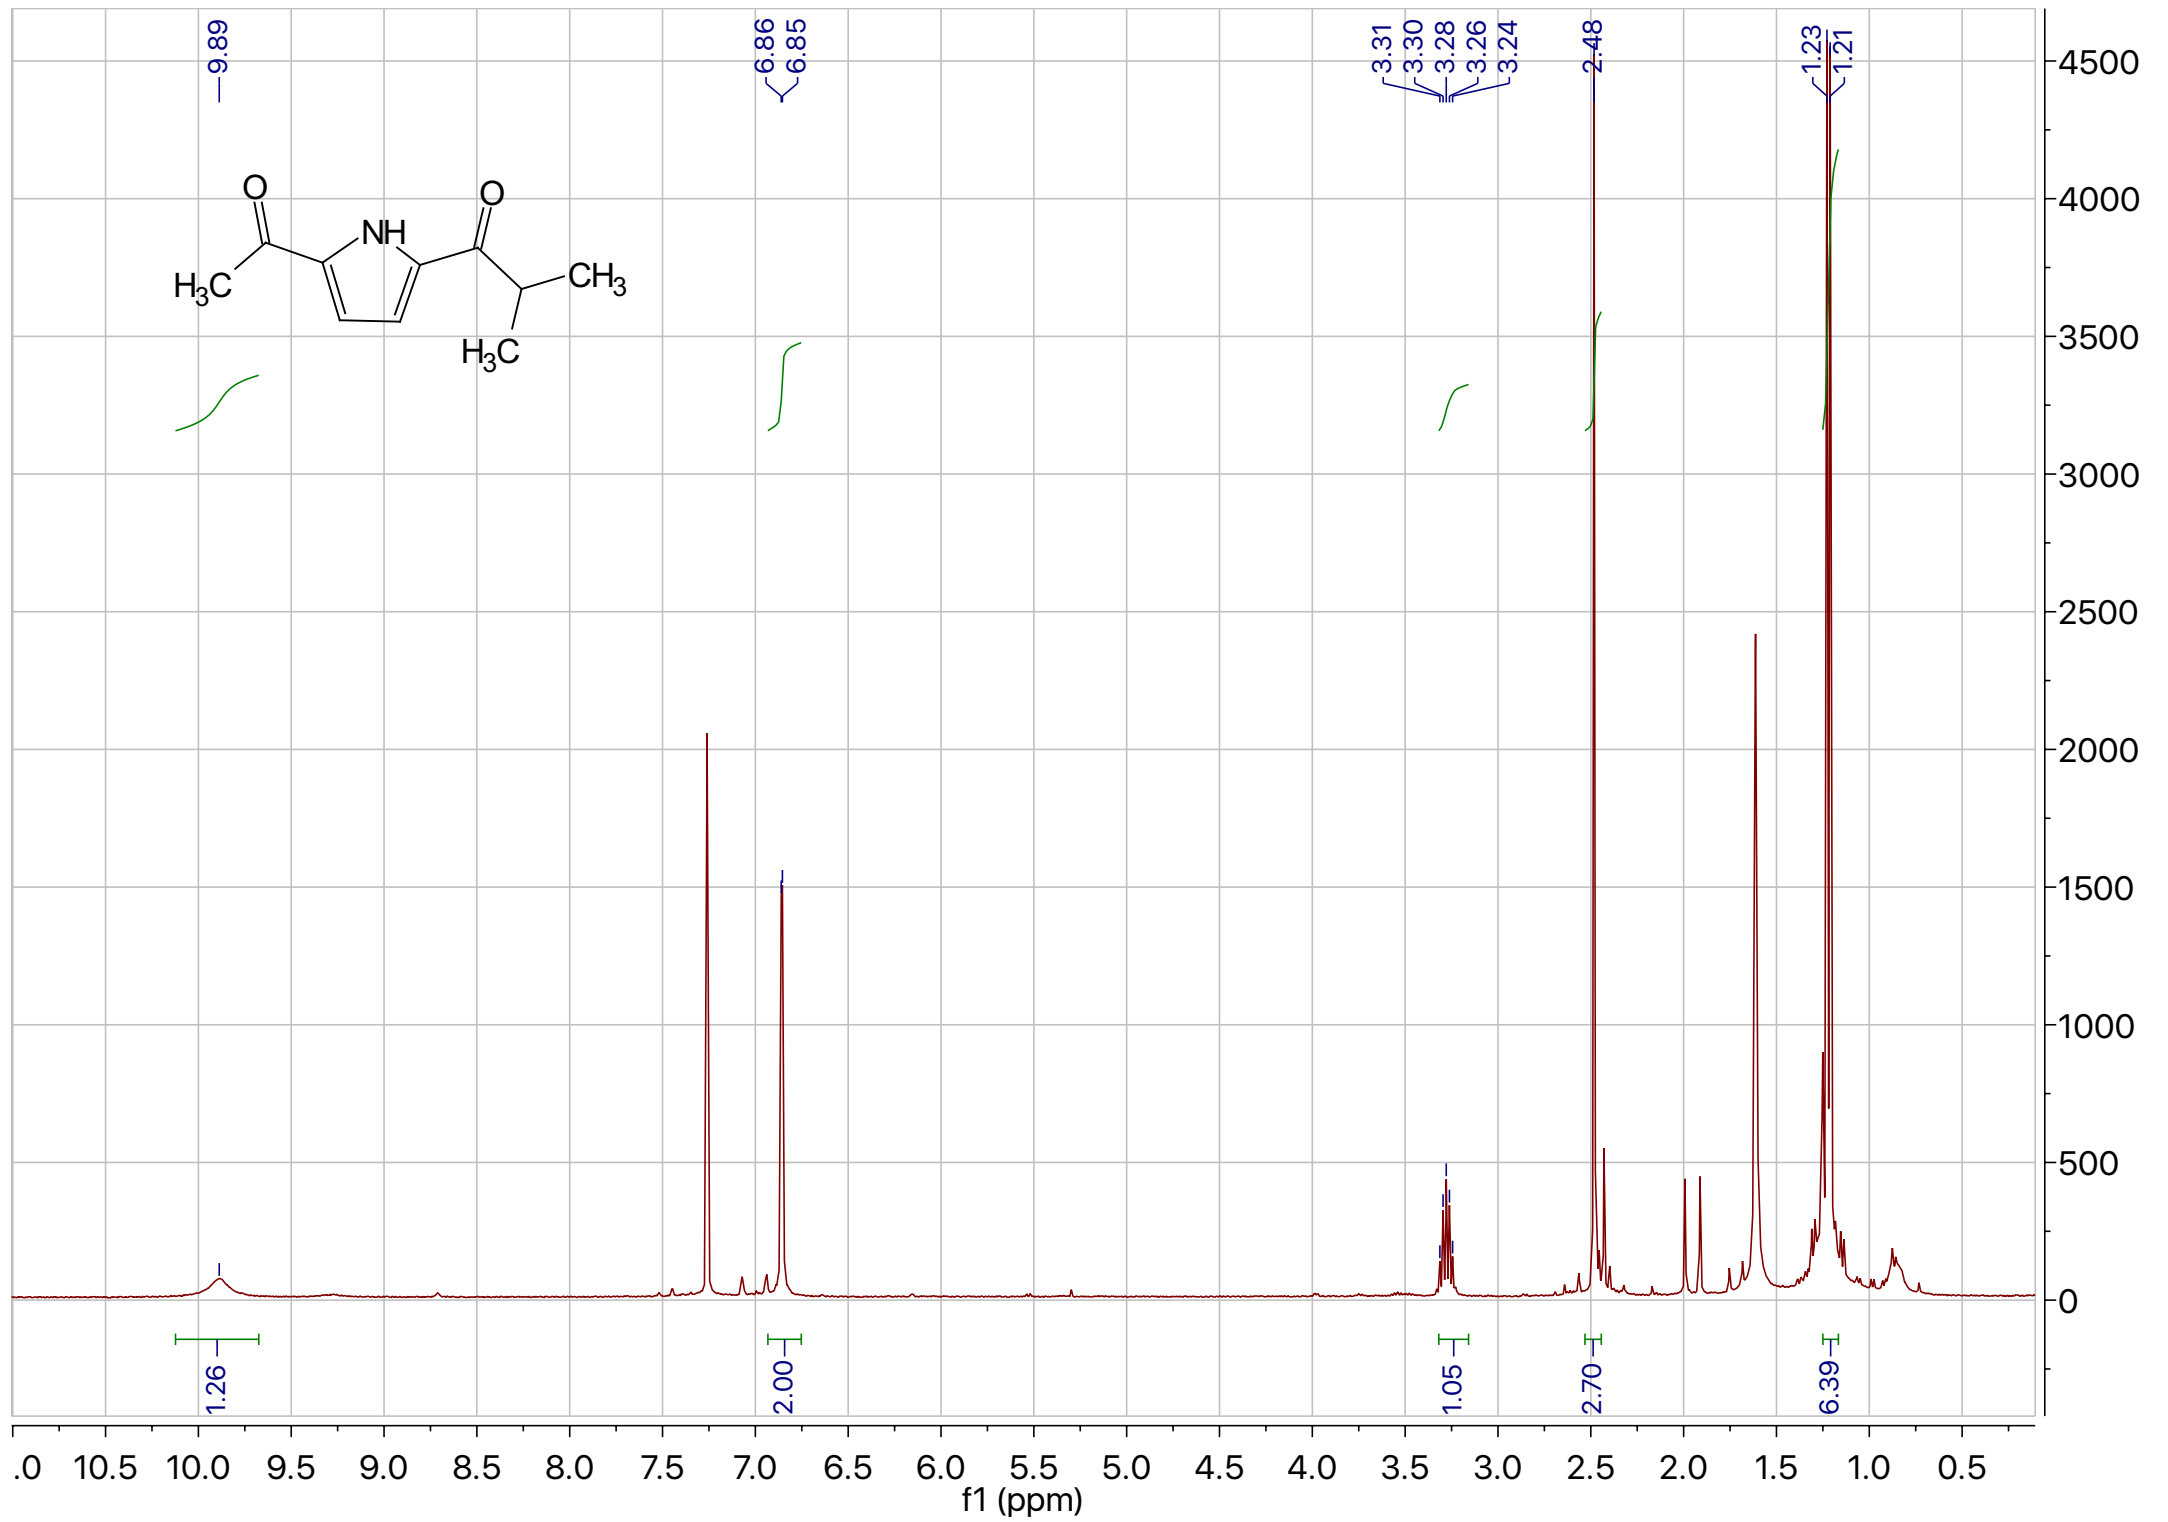

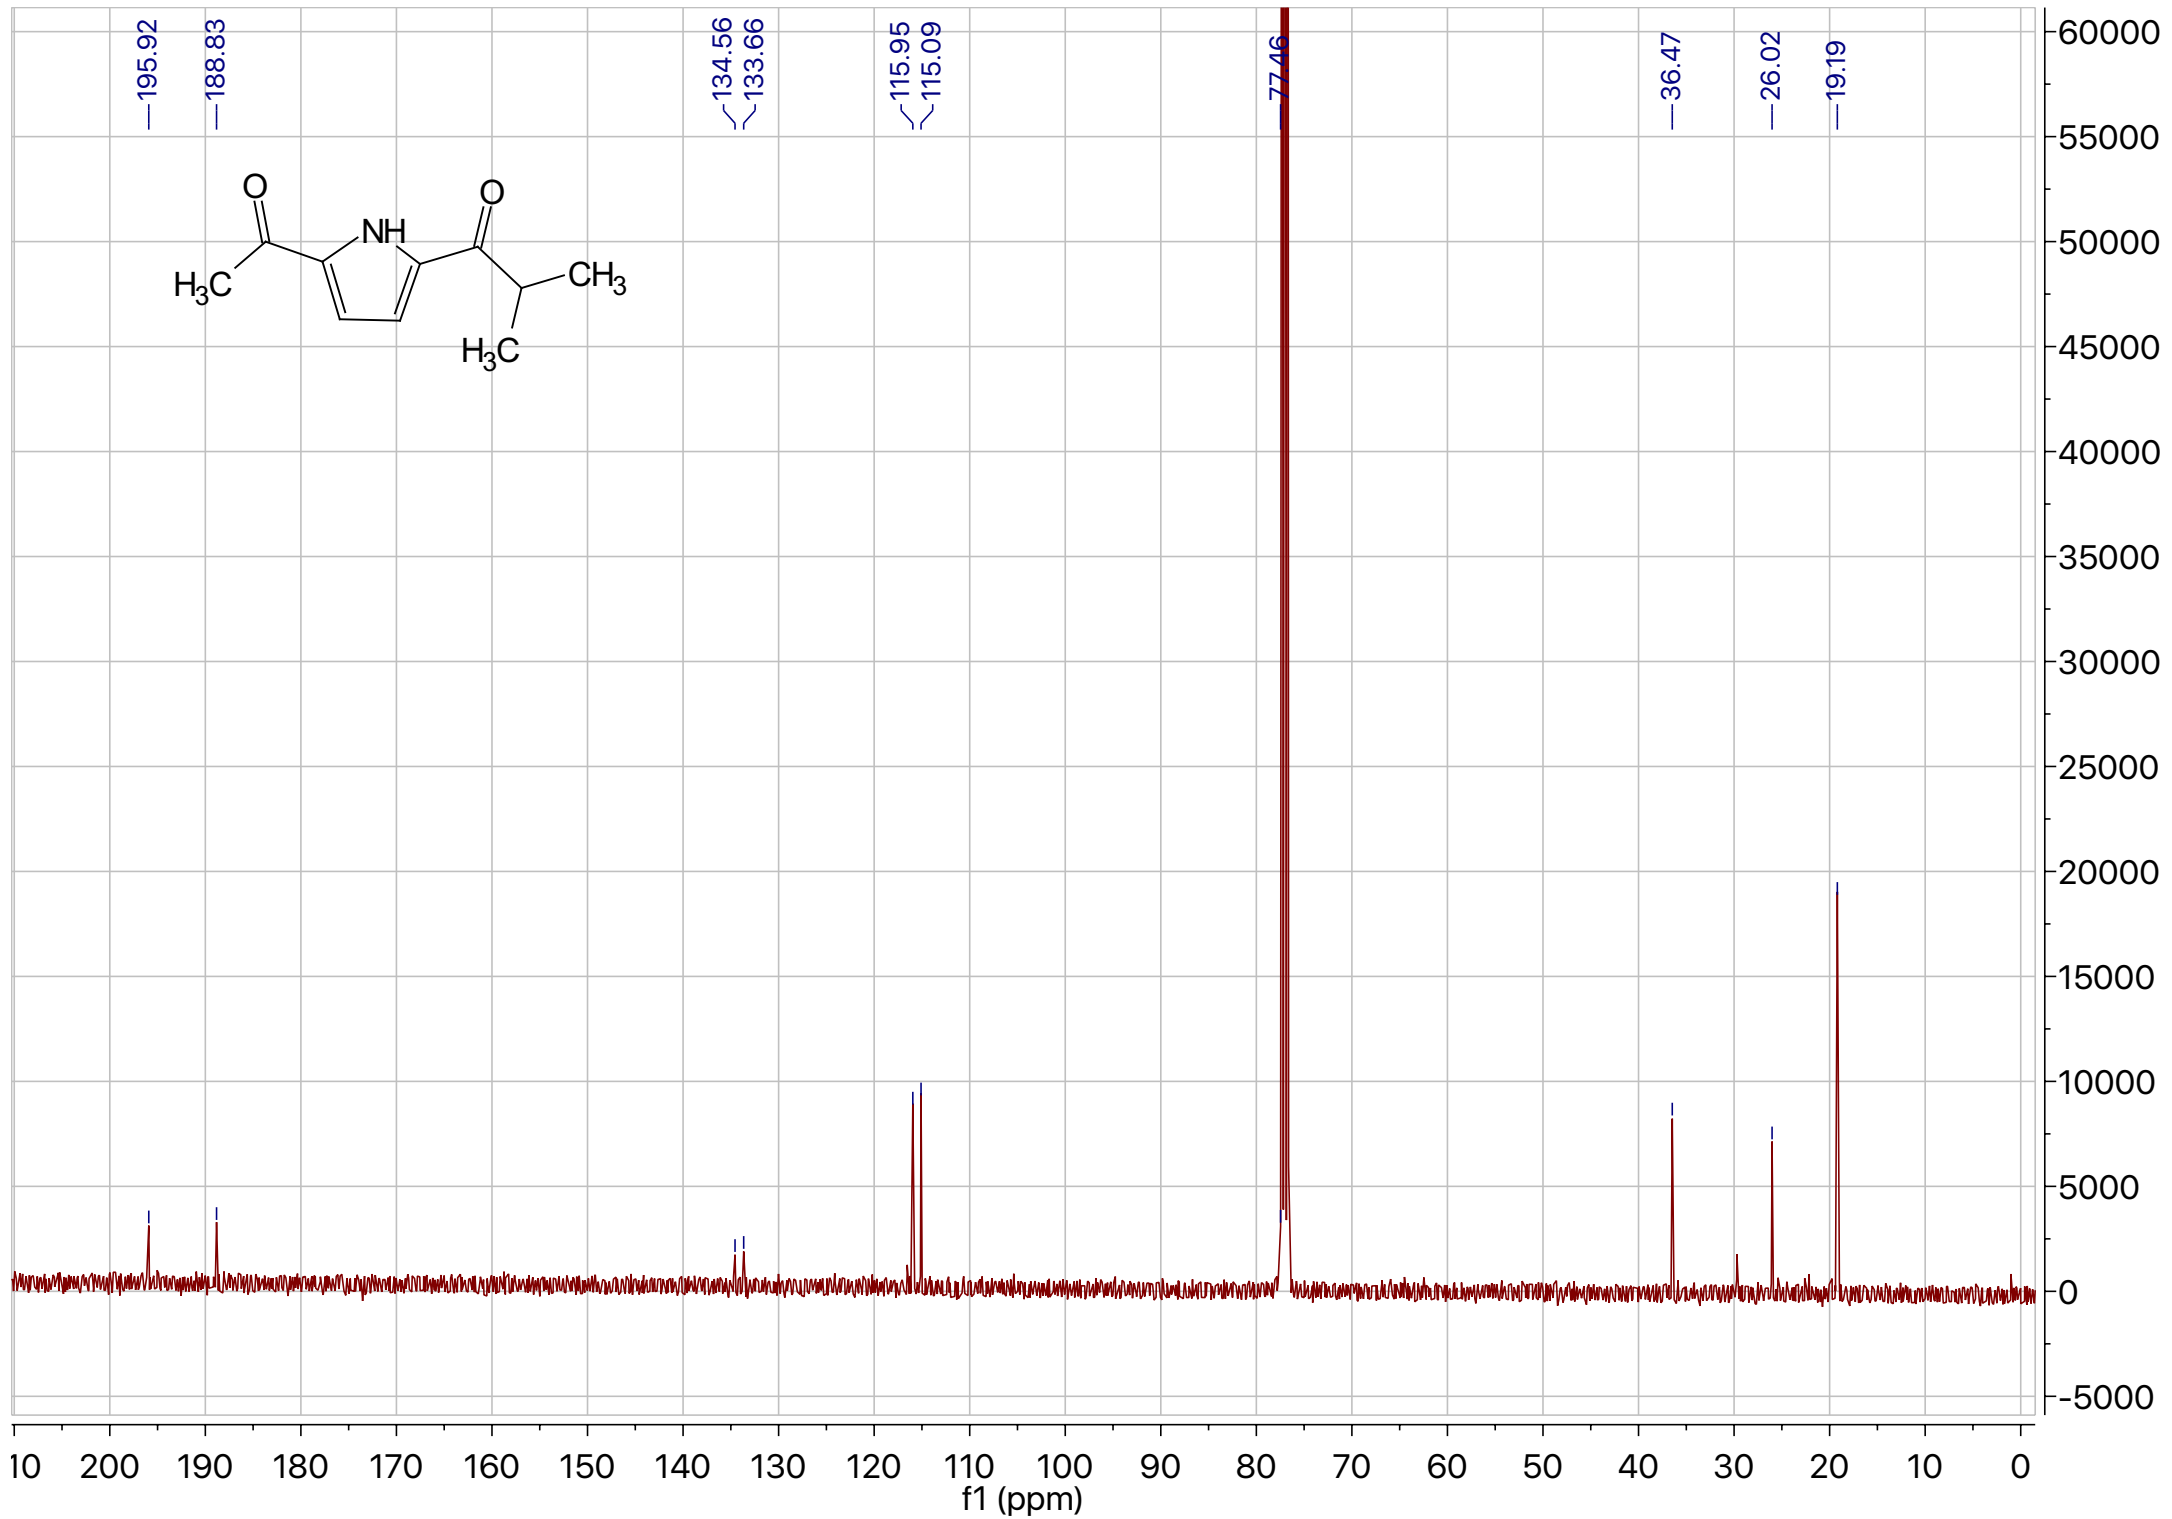

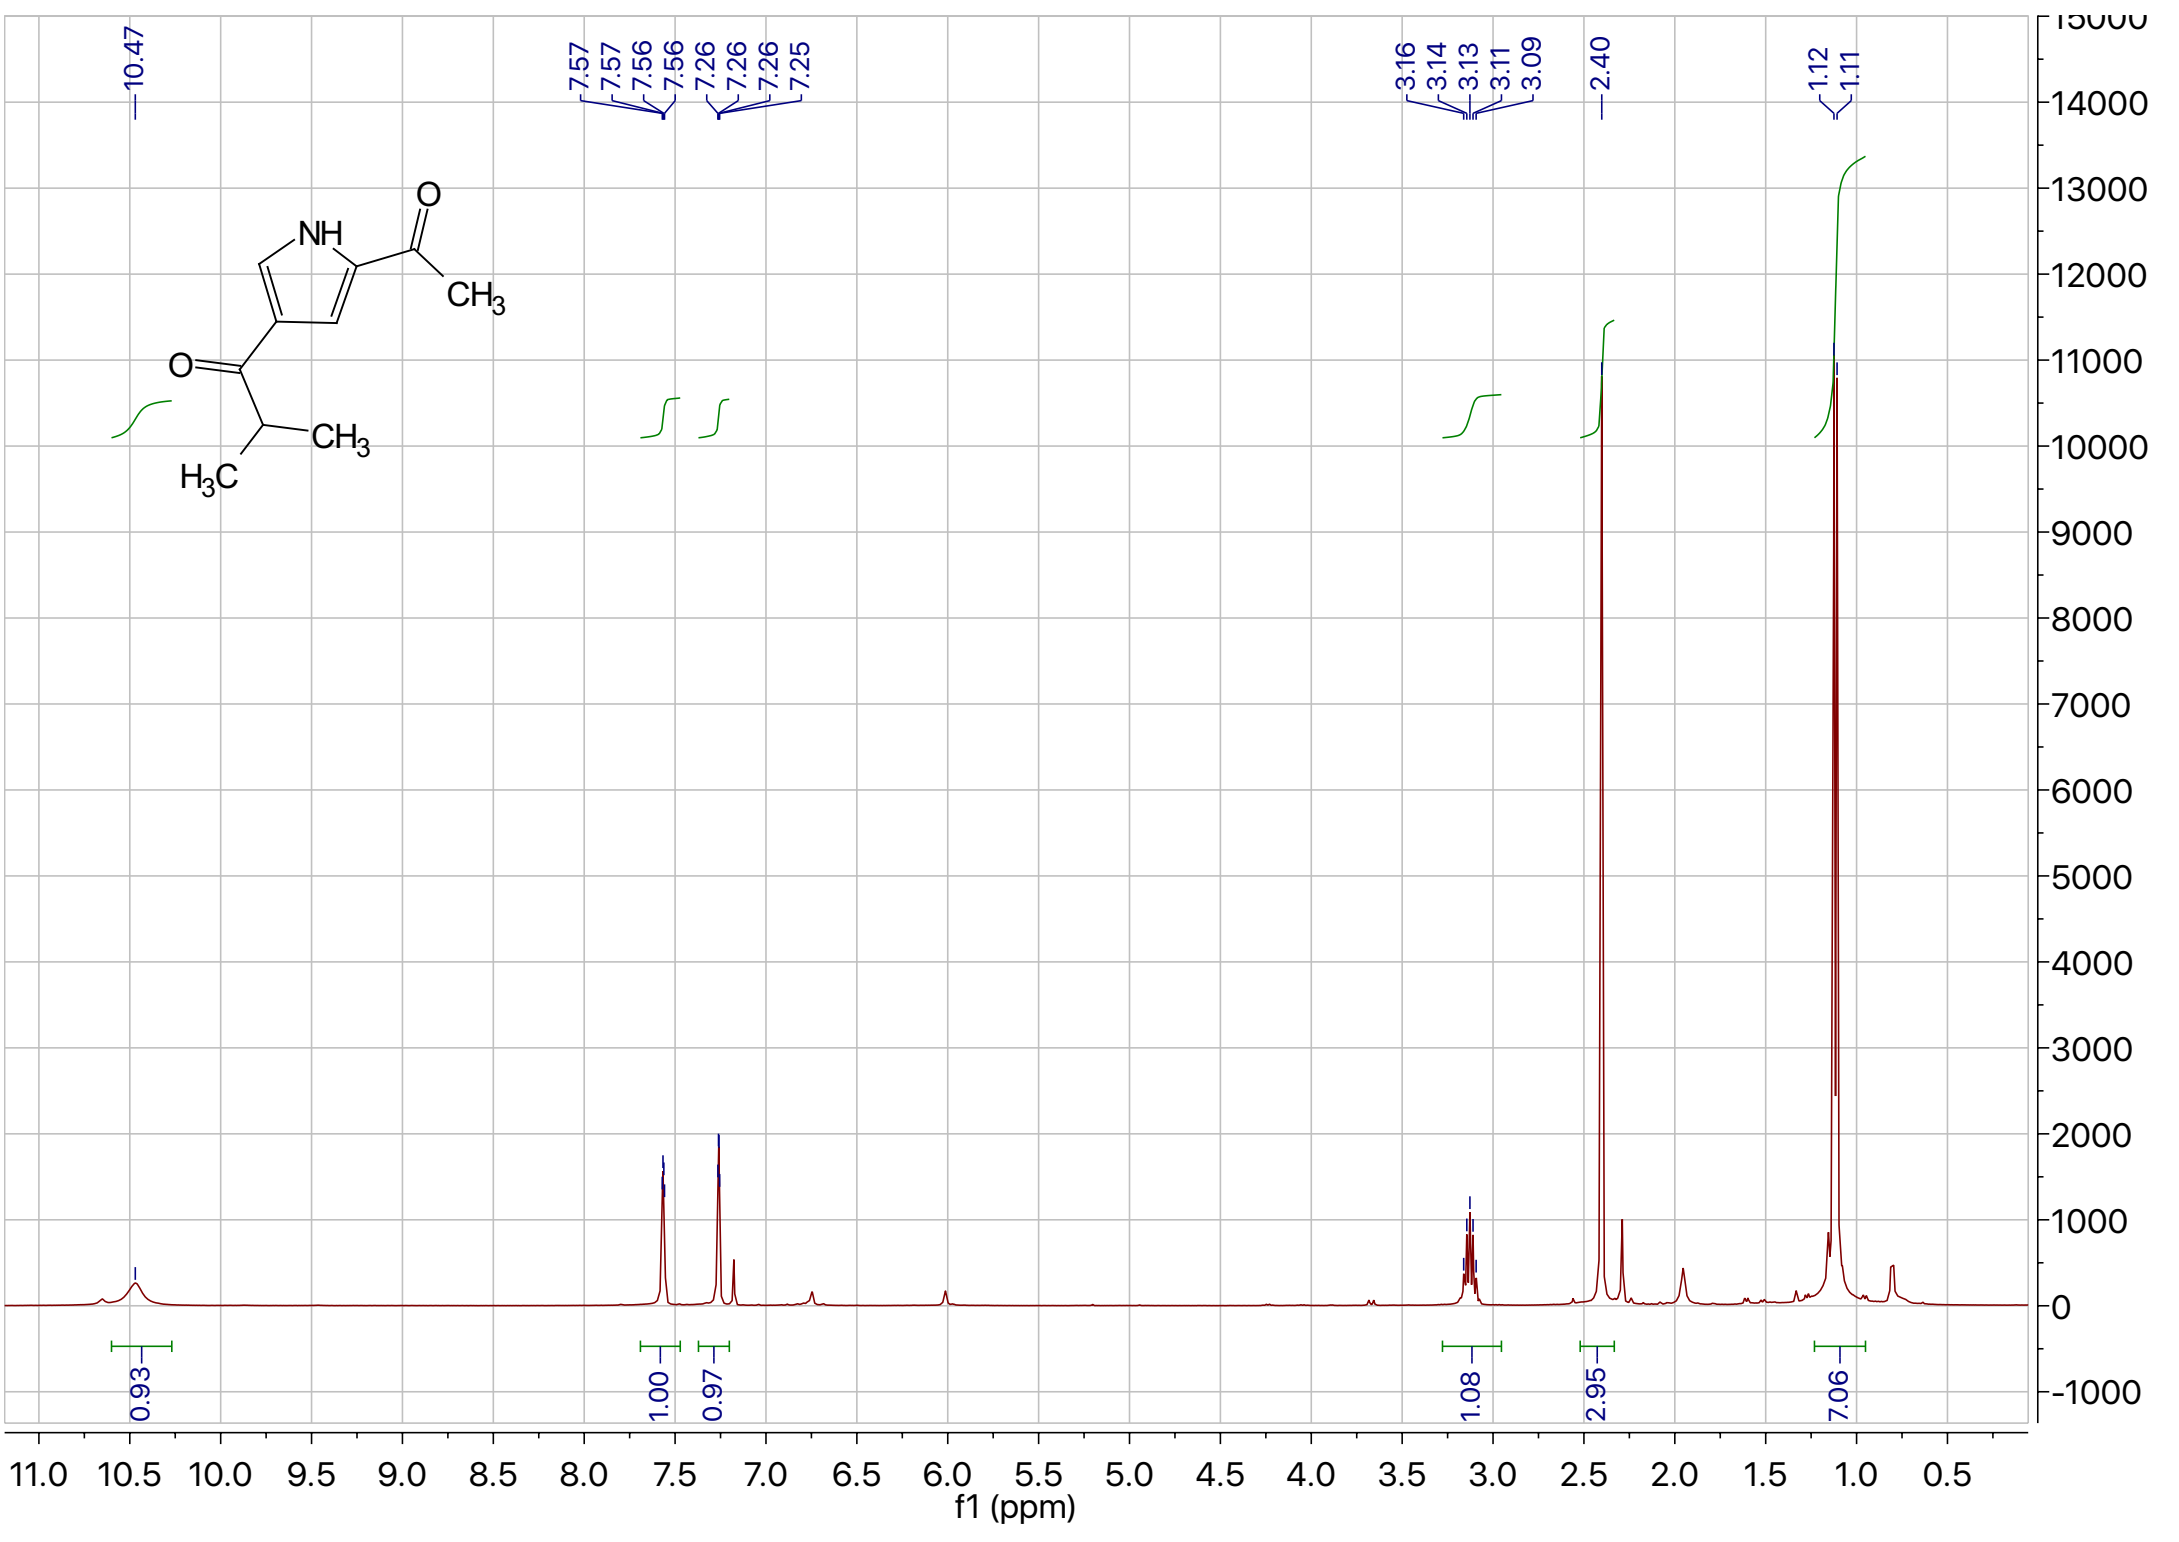



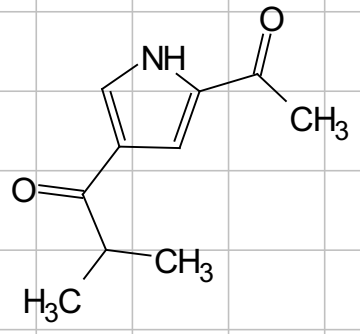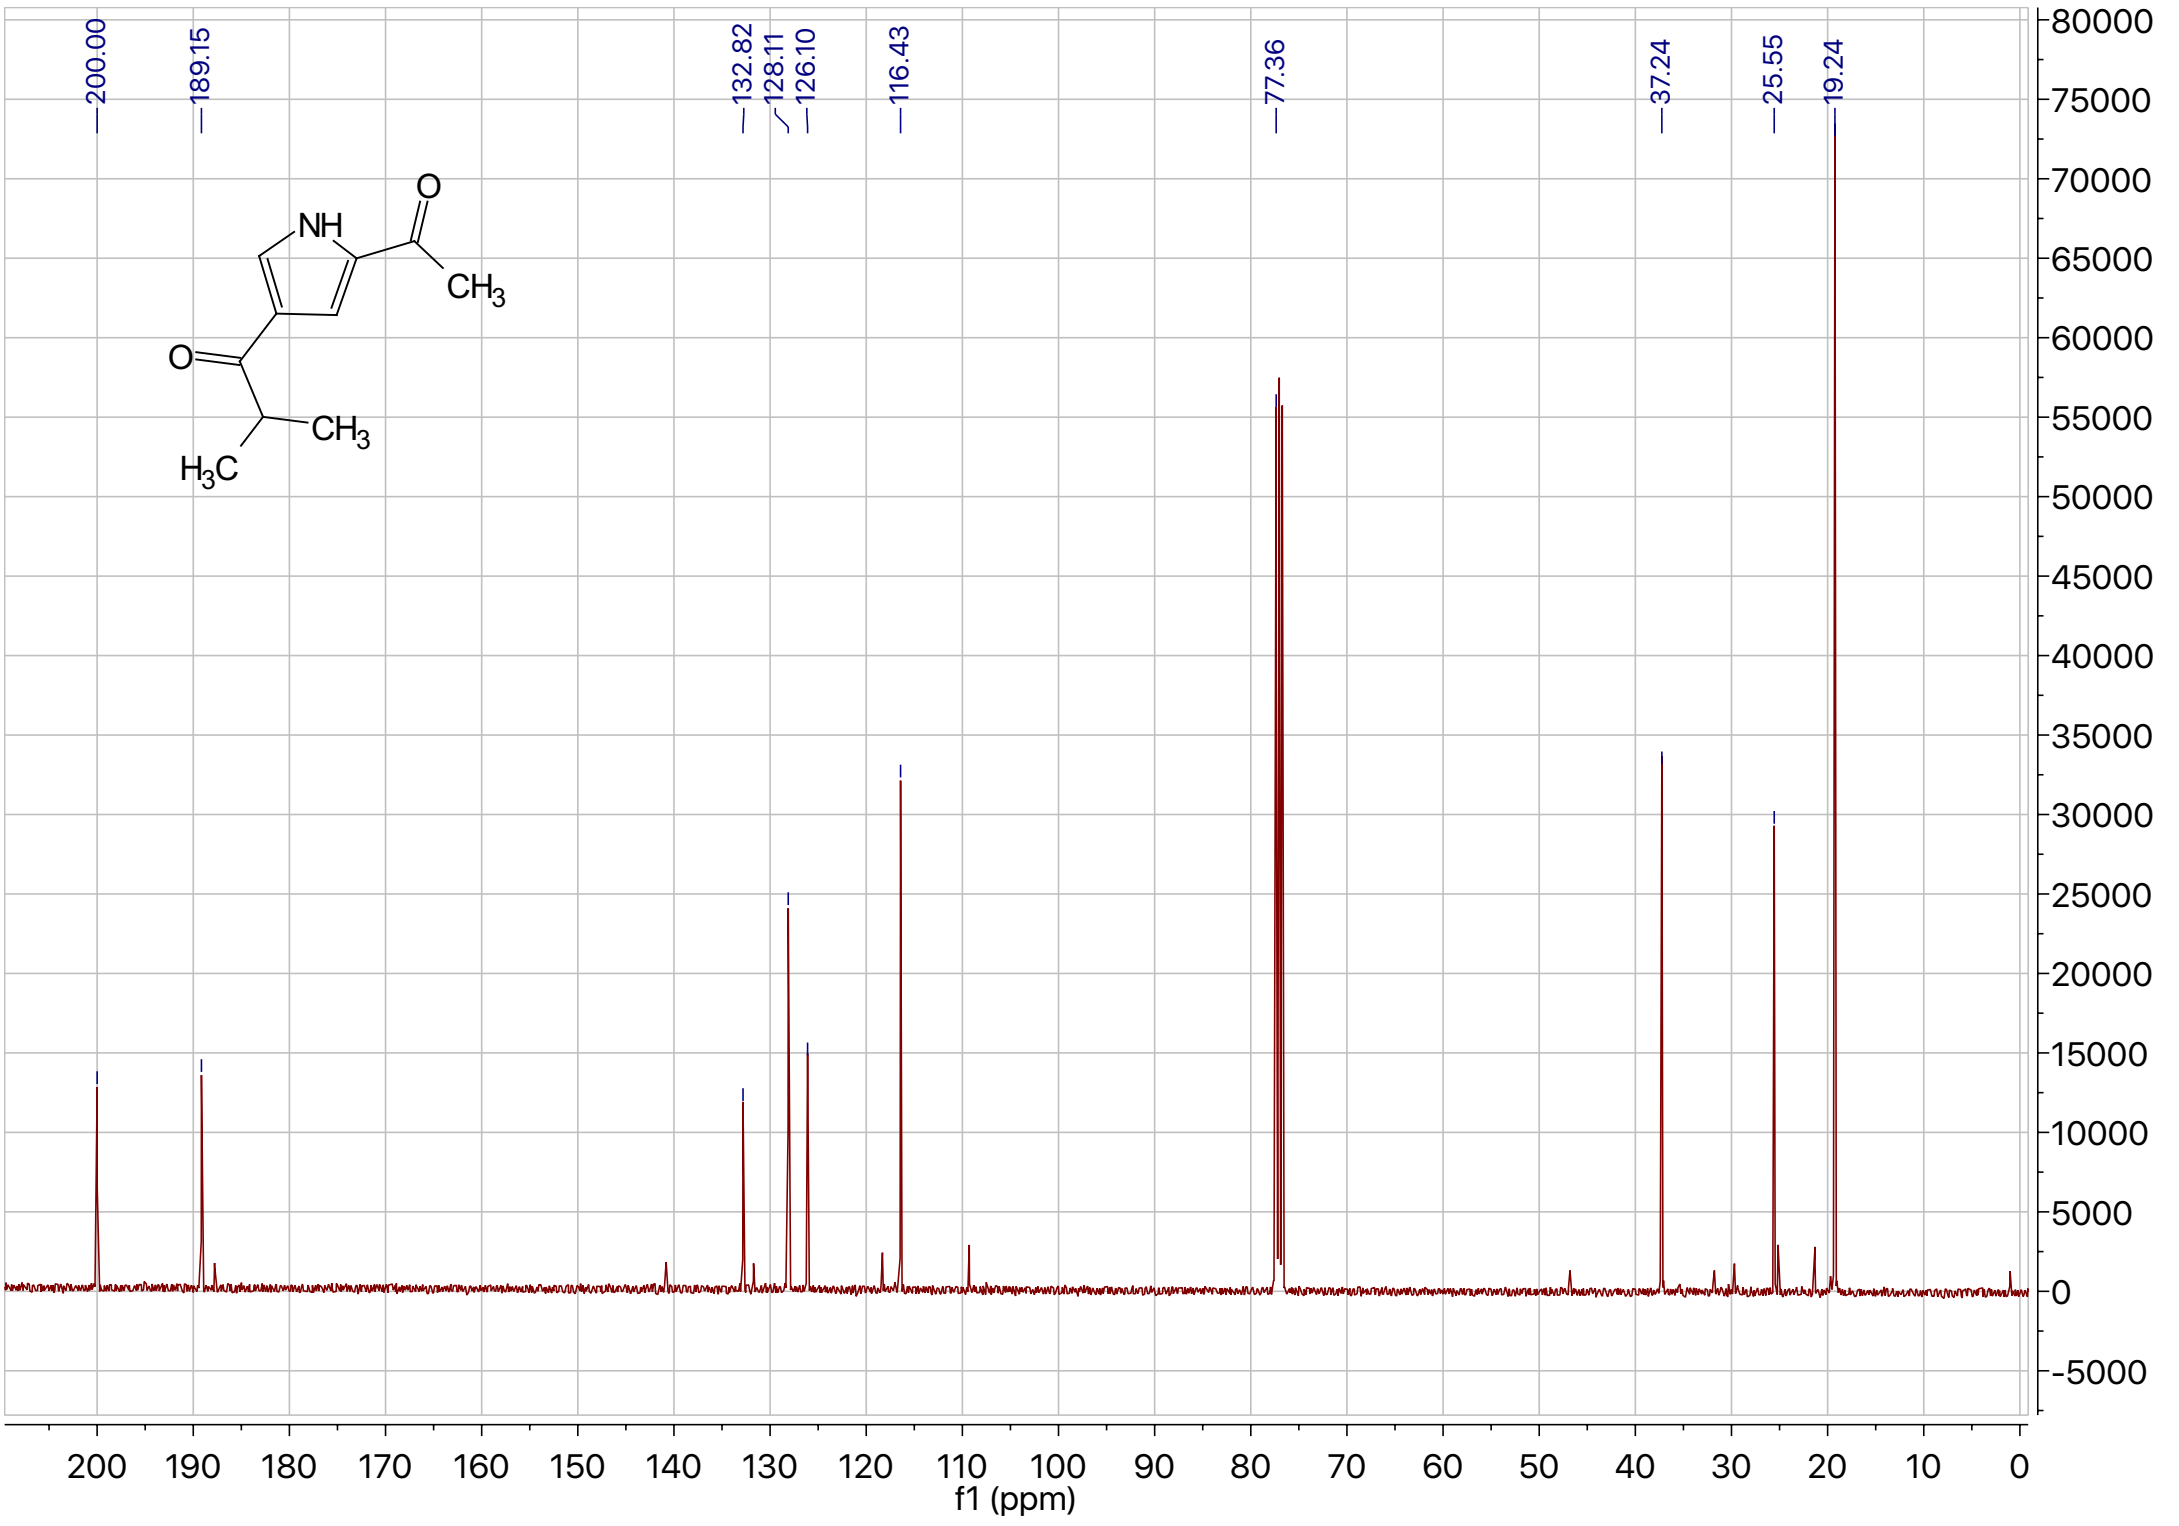

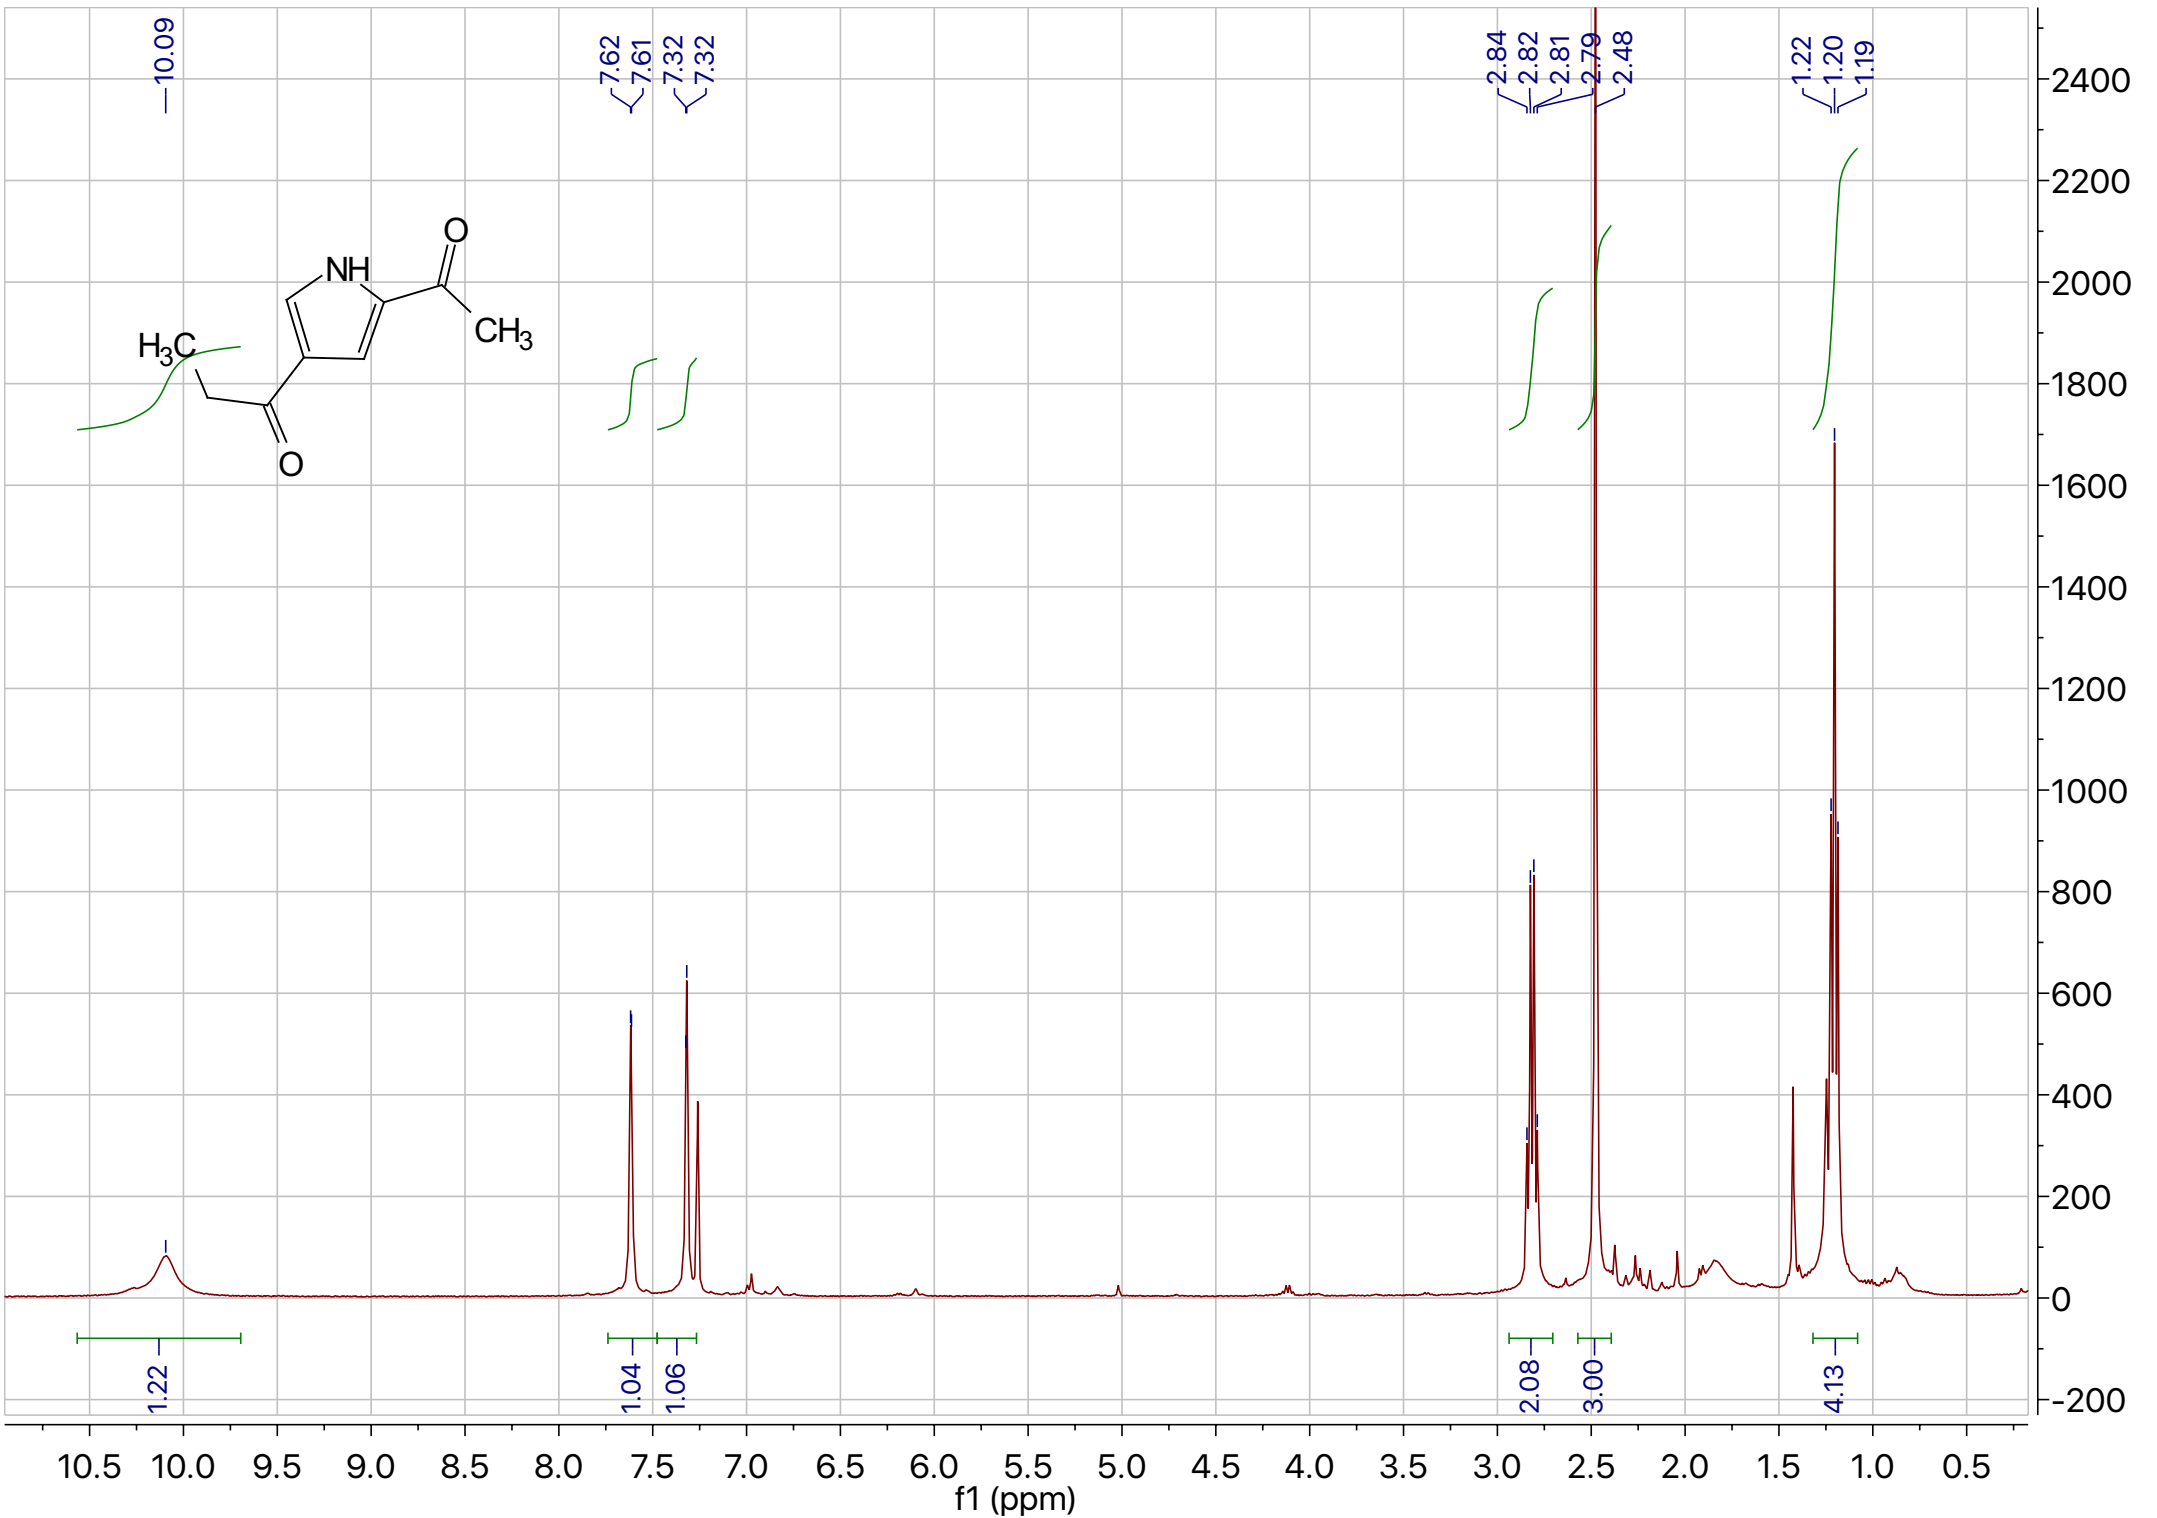

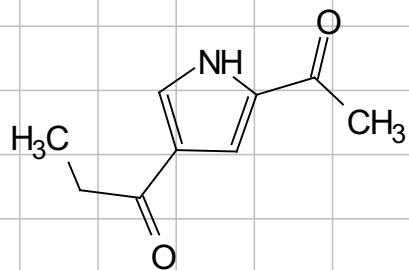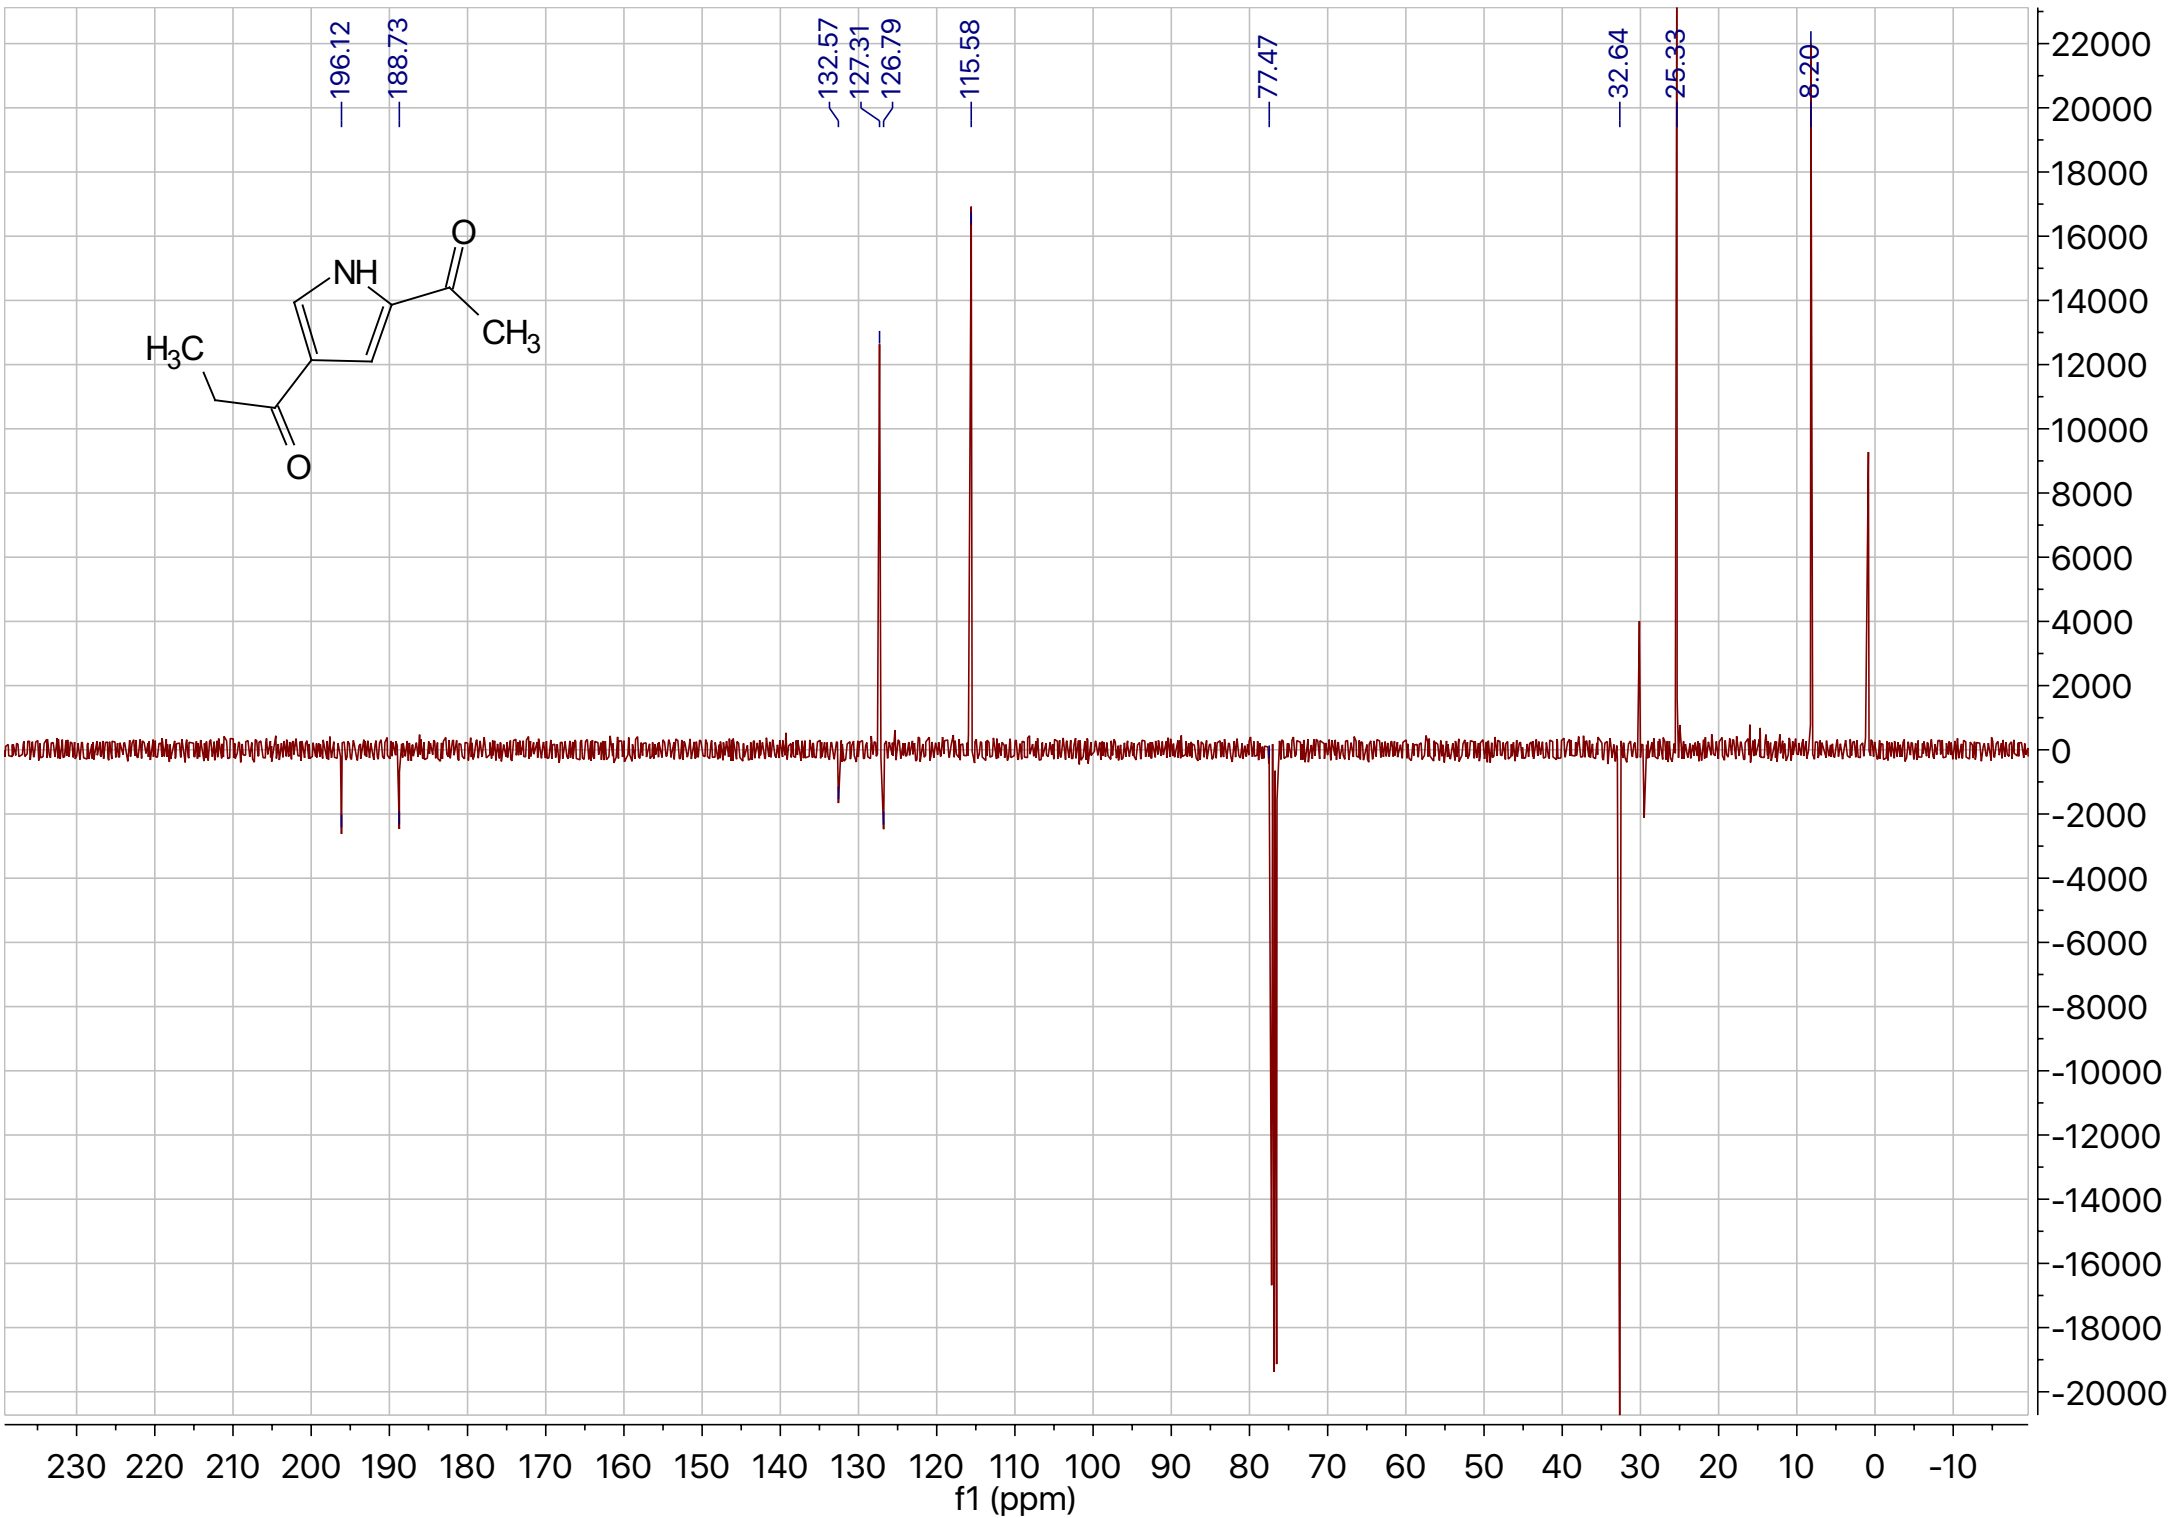

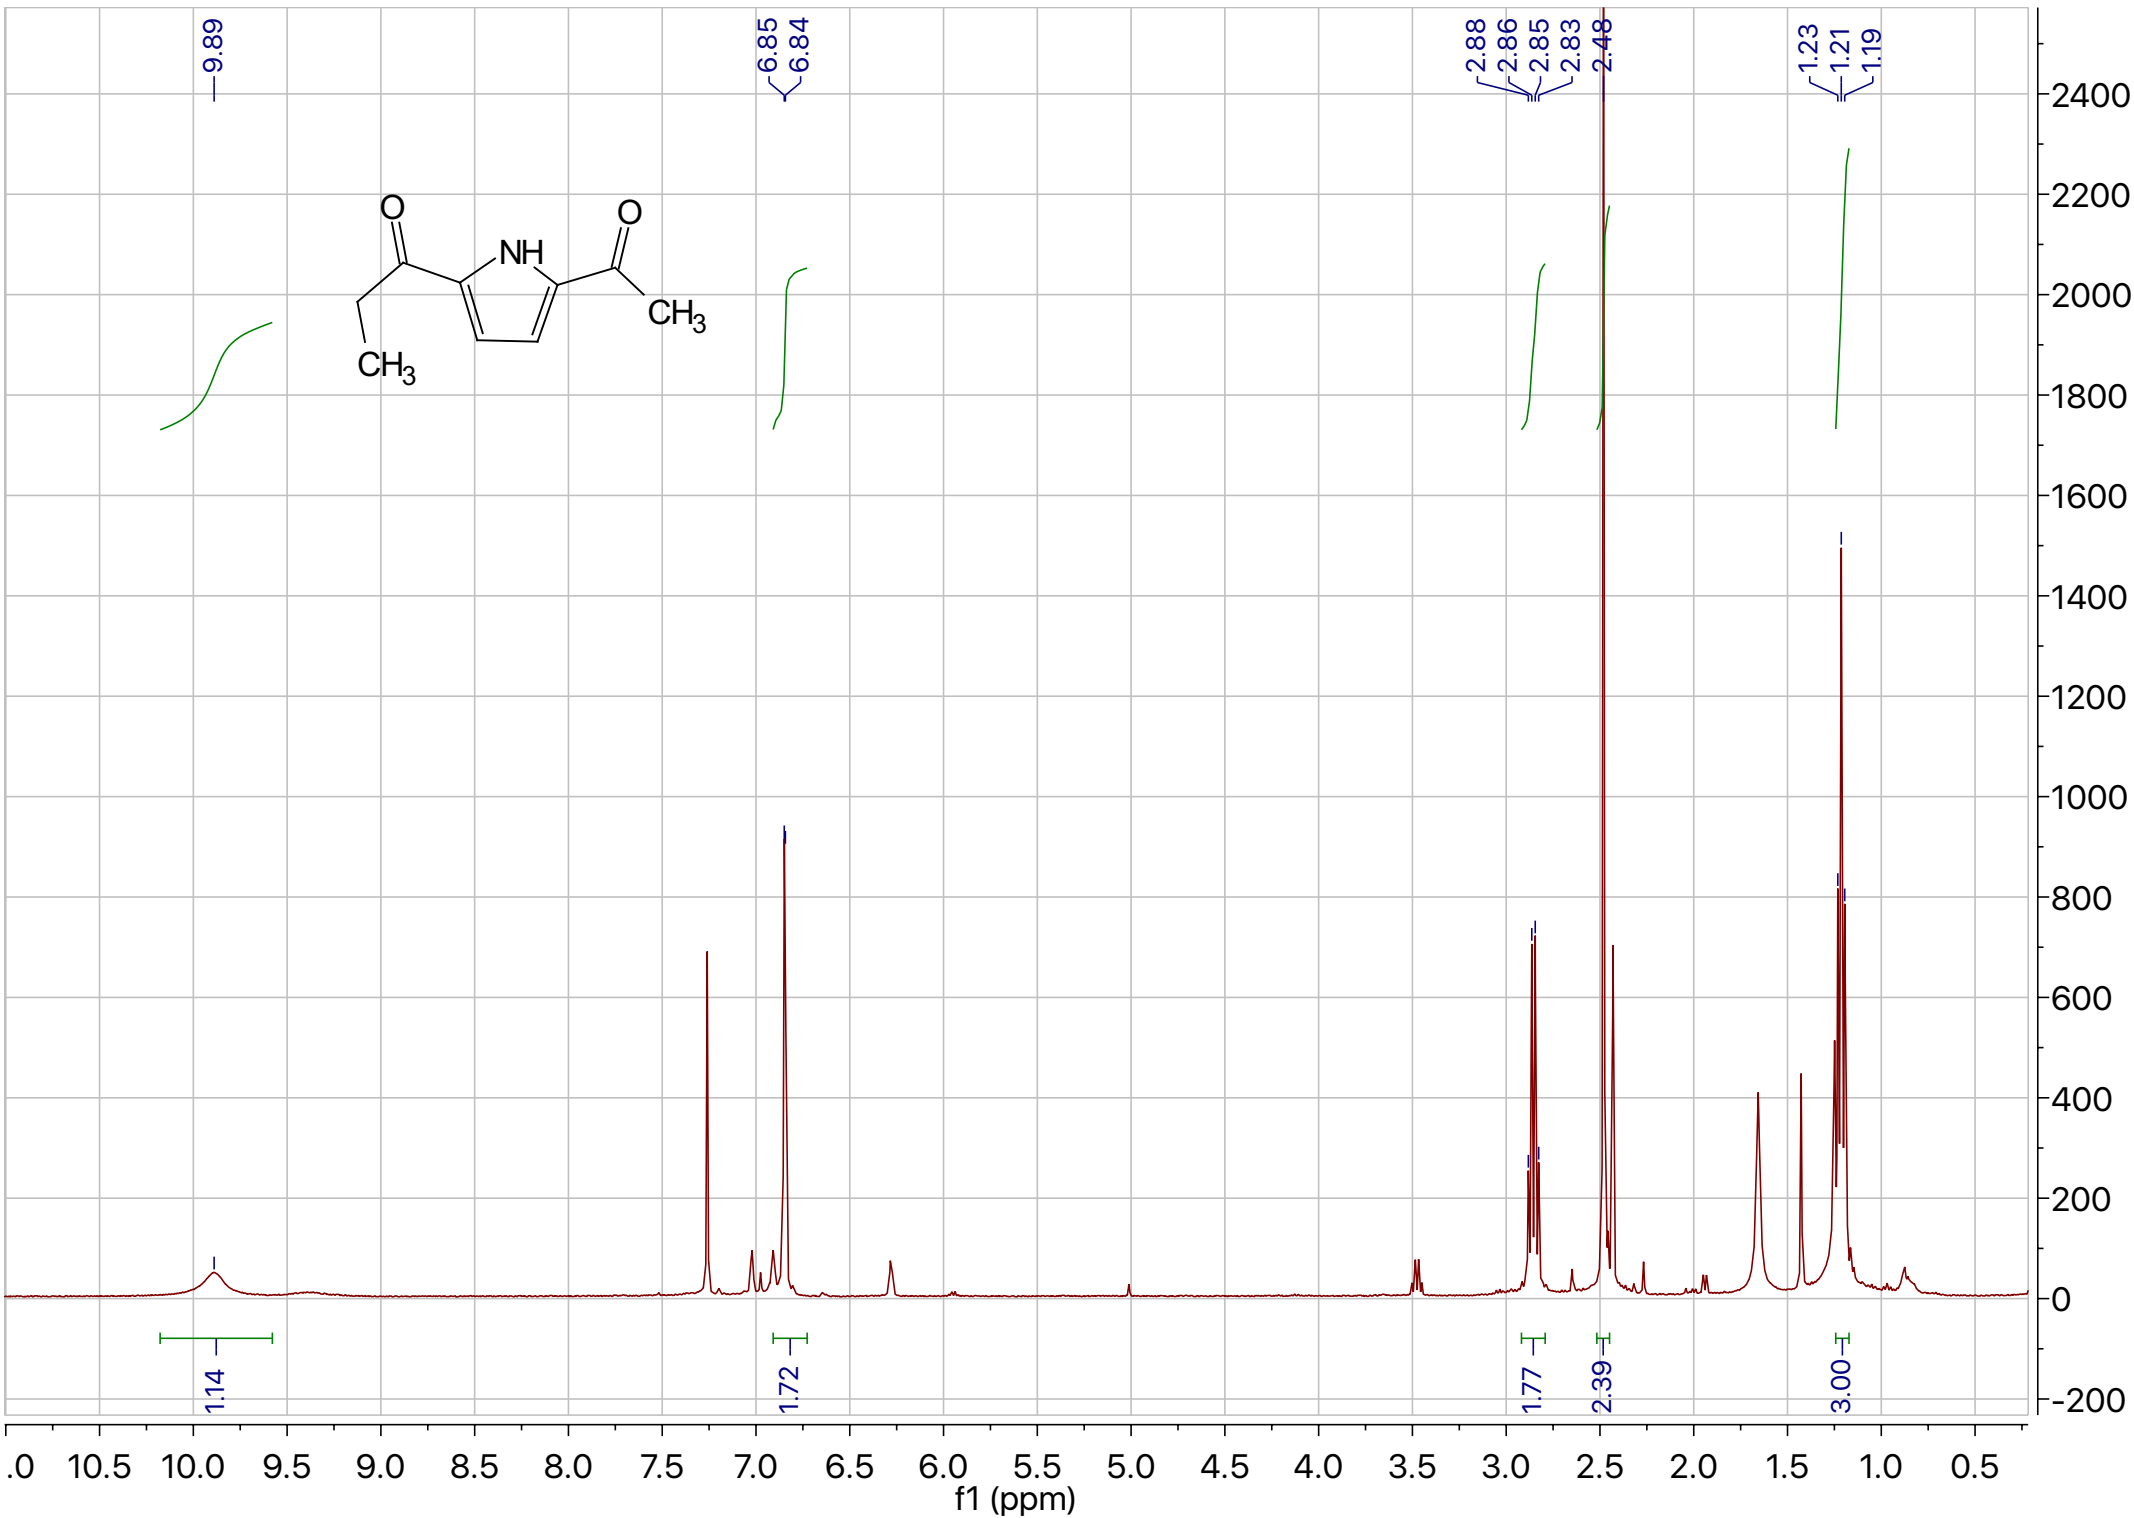

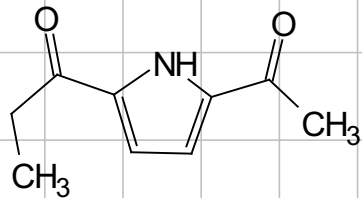

192.30  
188.89

134.41  
134.32

115.95  
115.05

77.33

31.80

26.03

8.30

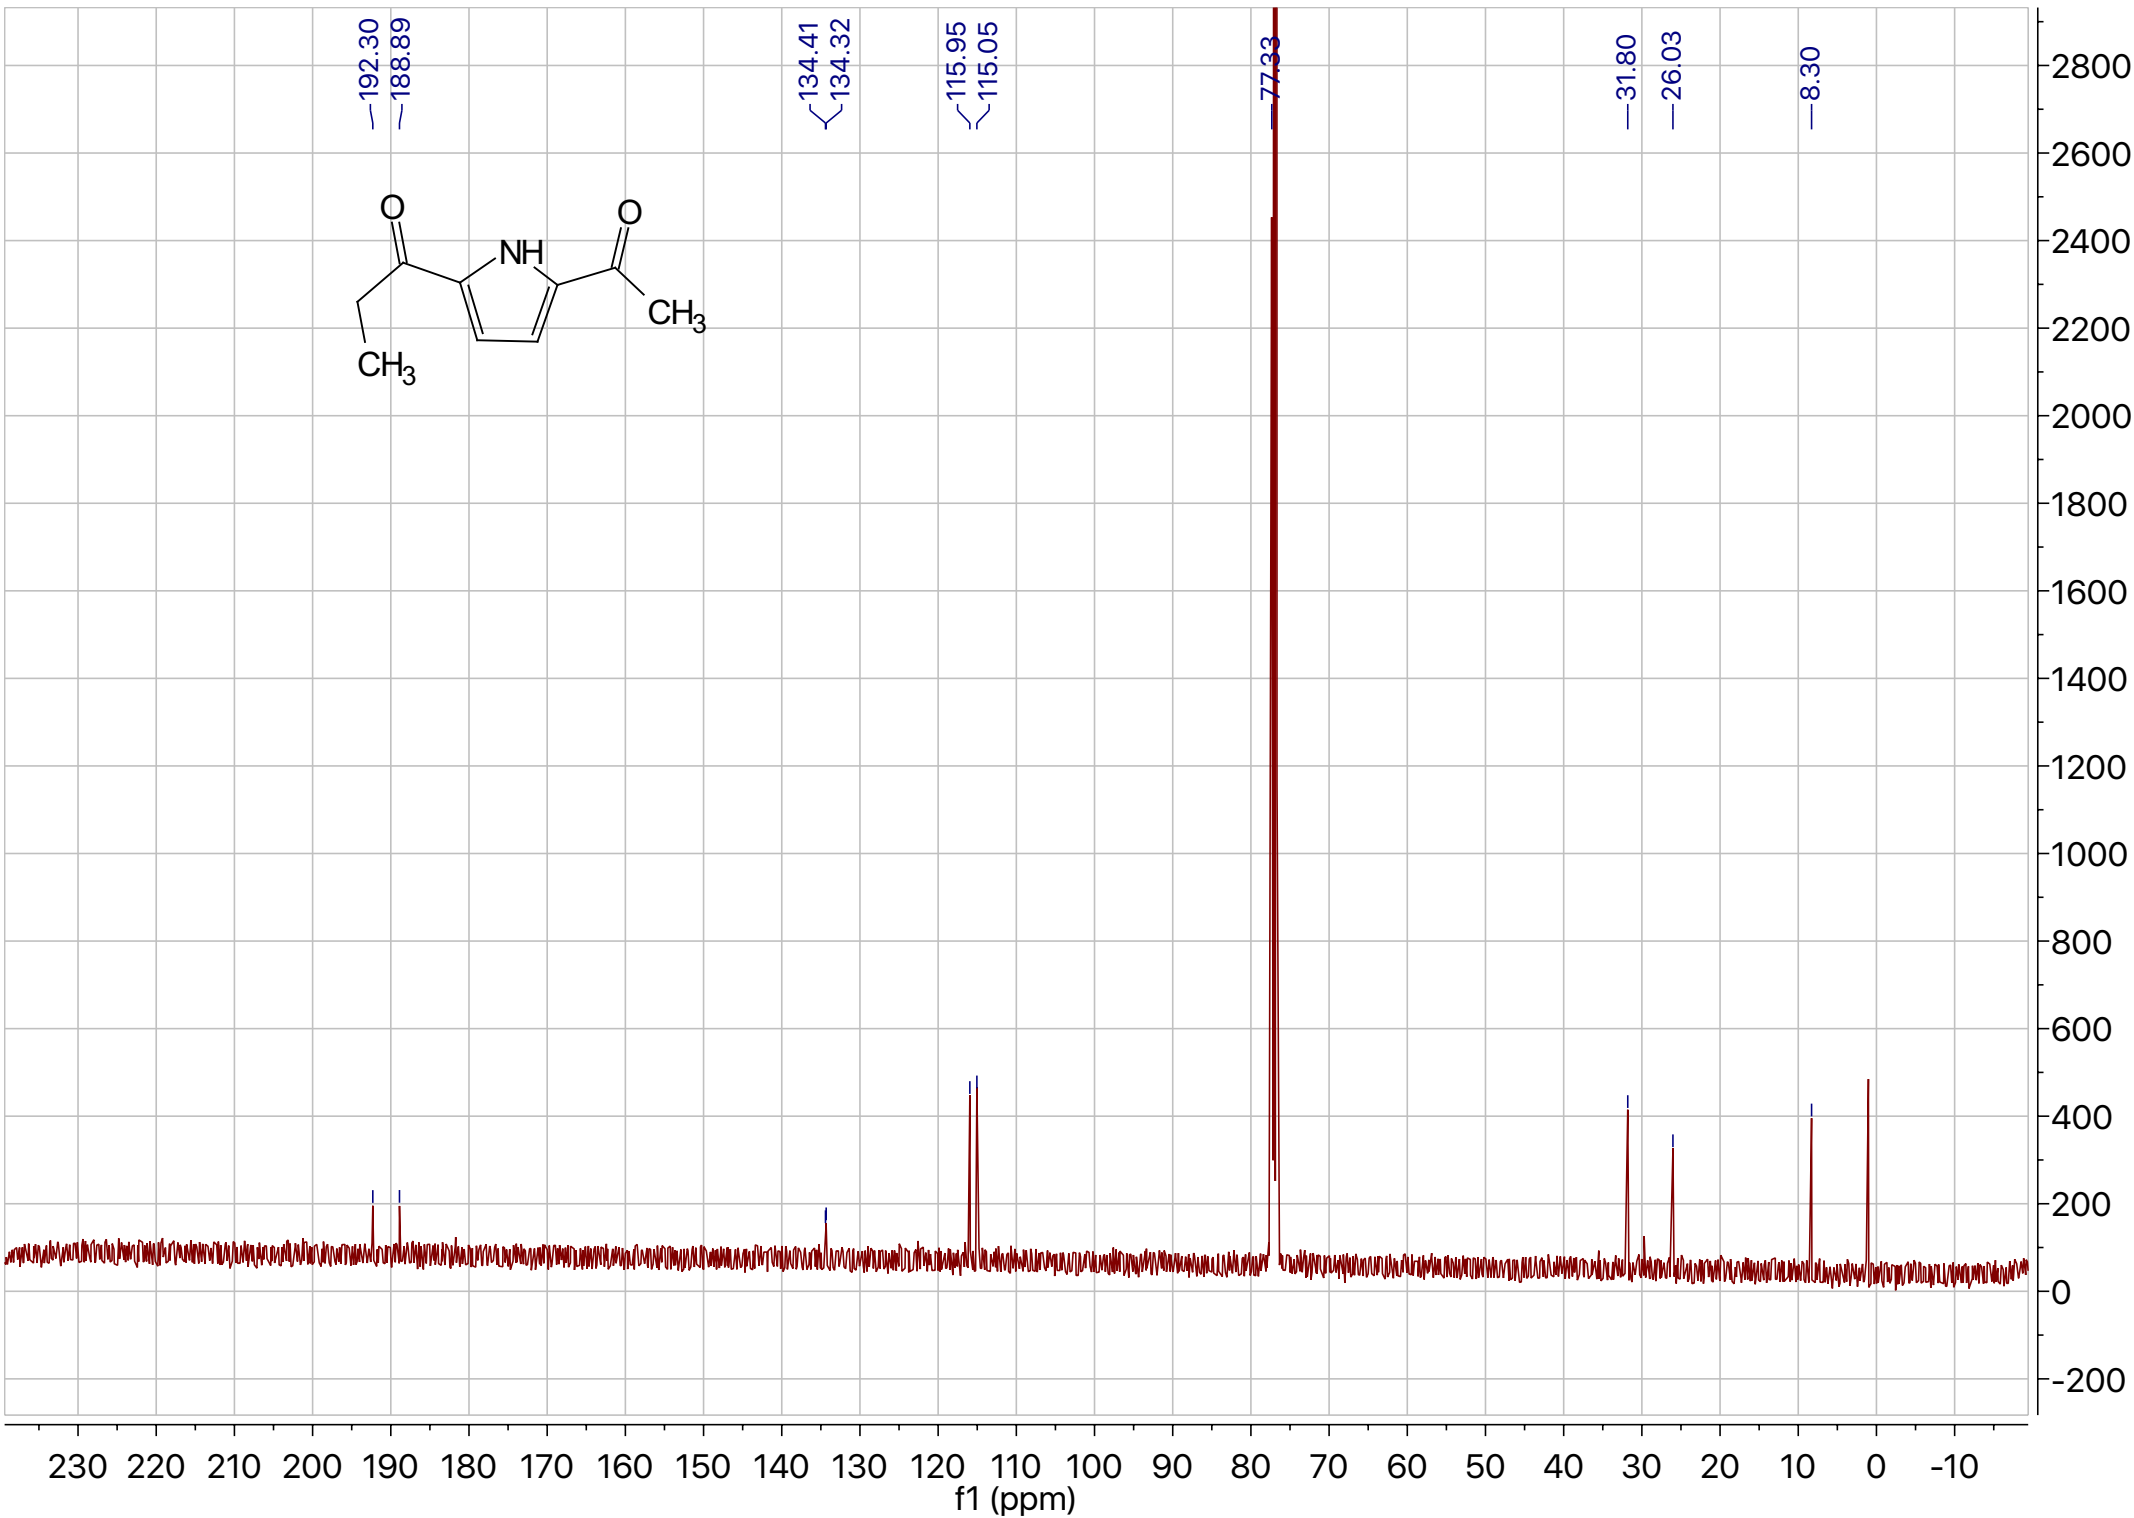

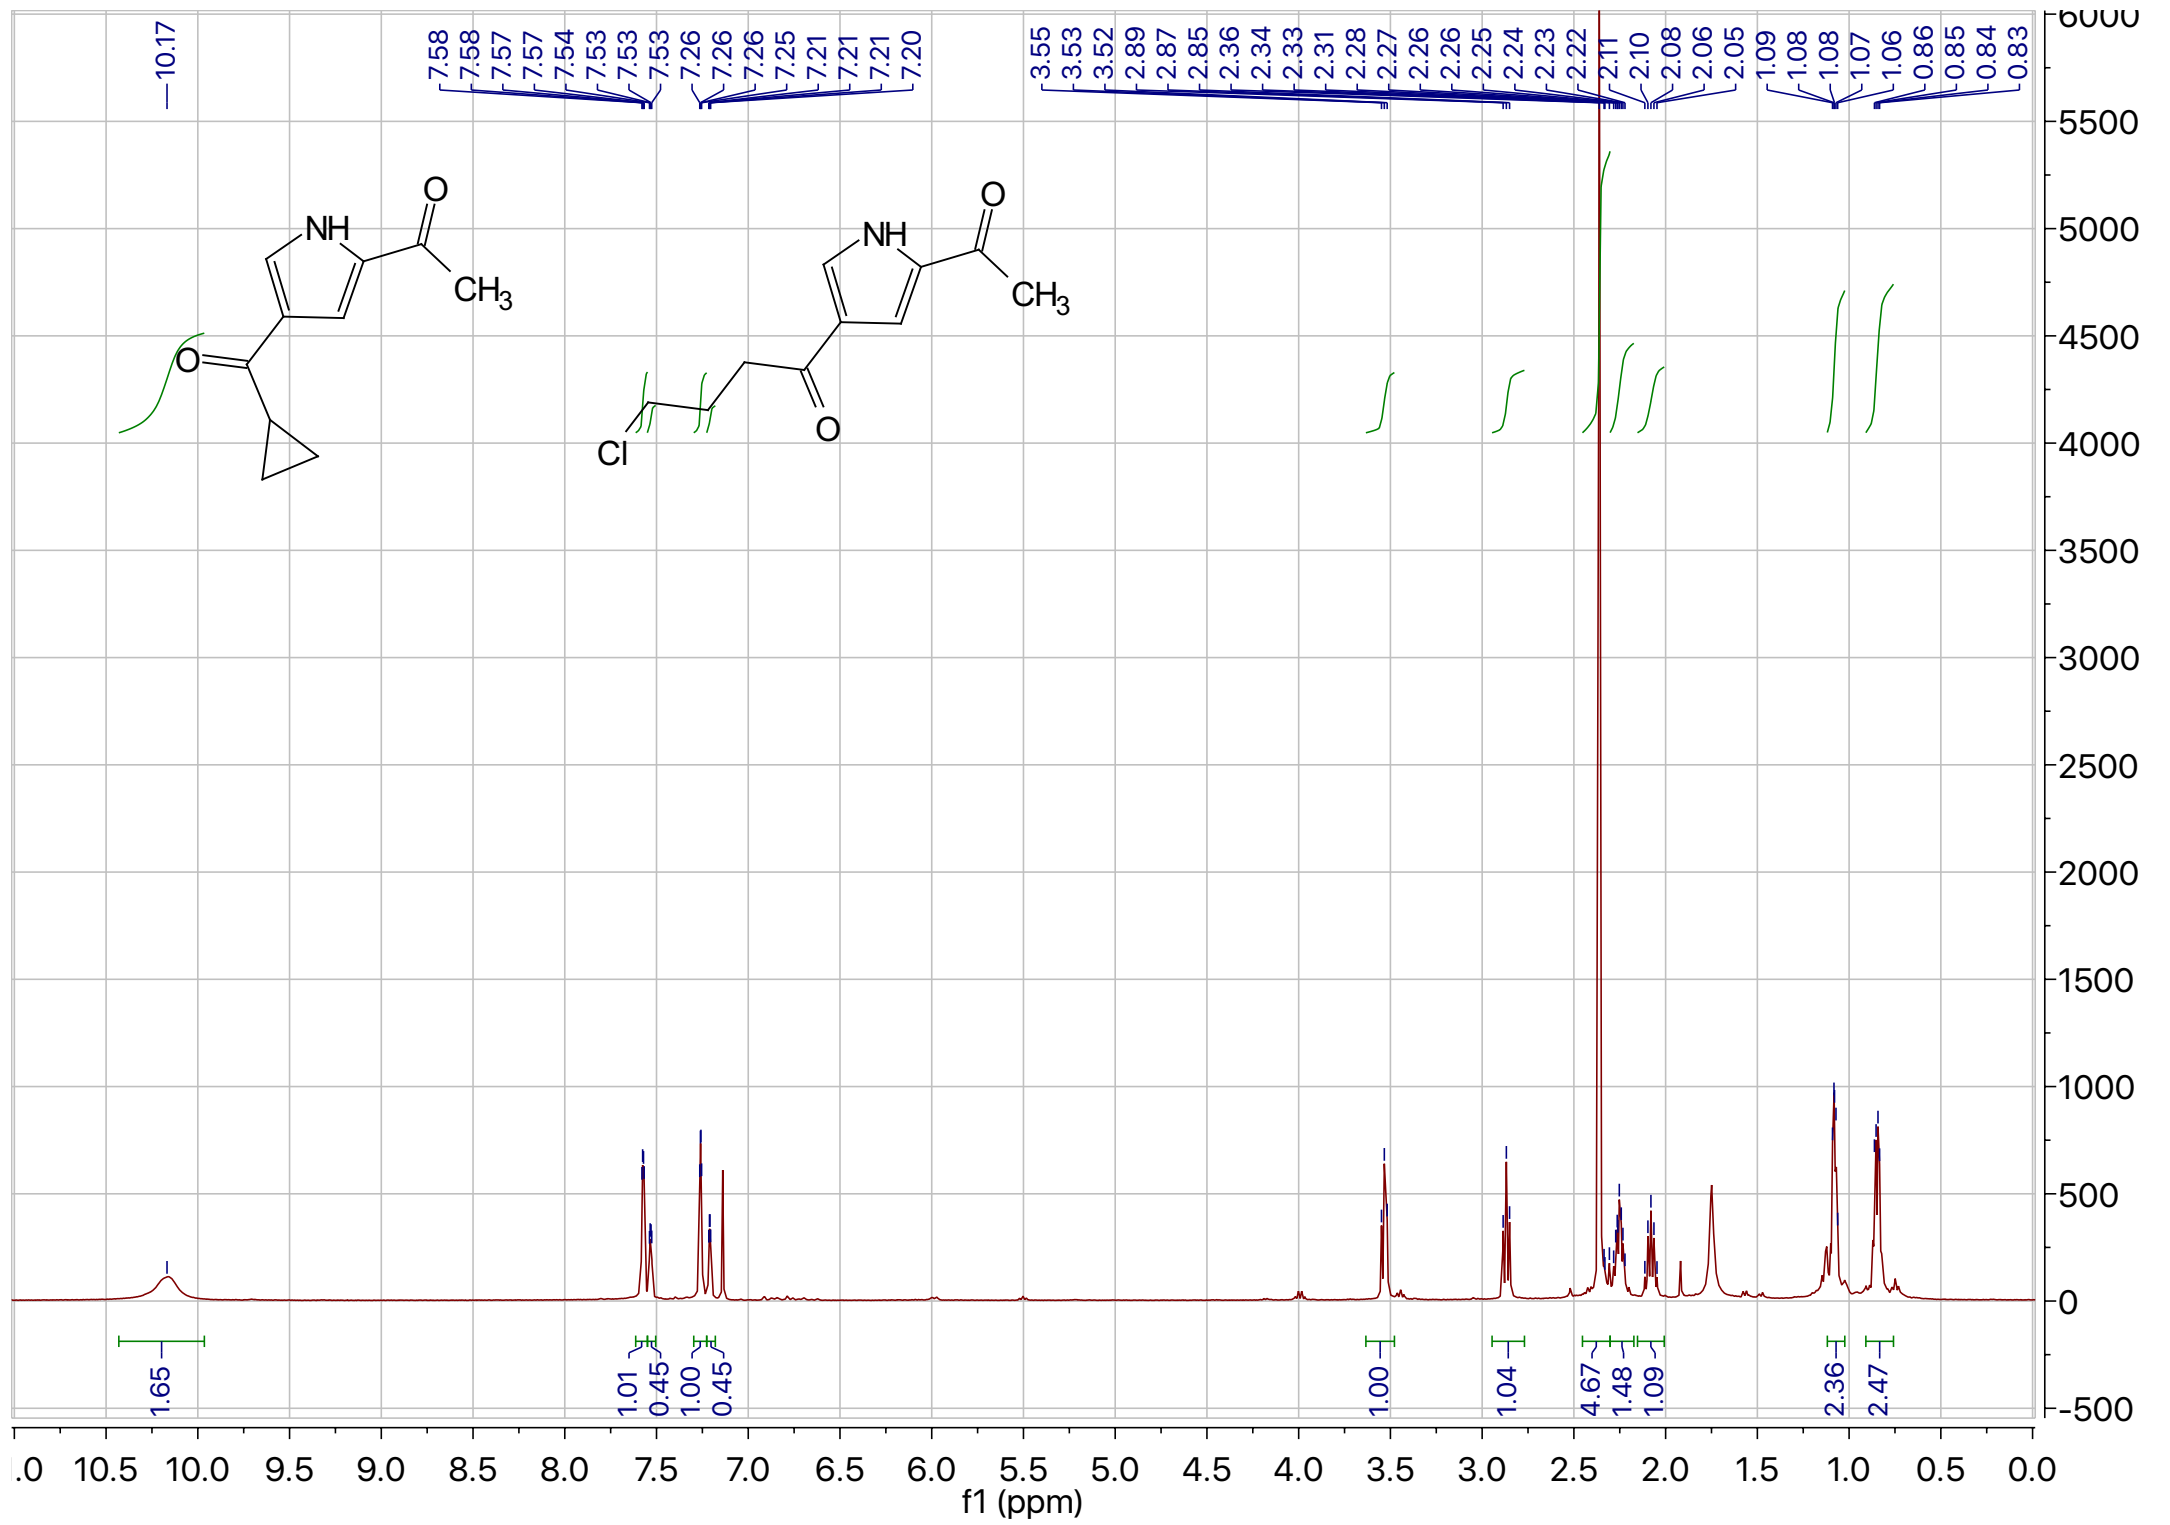

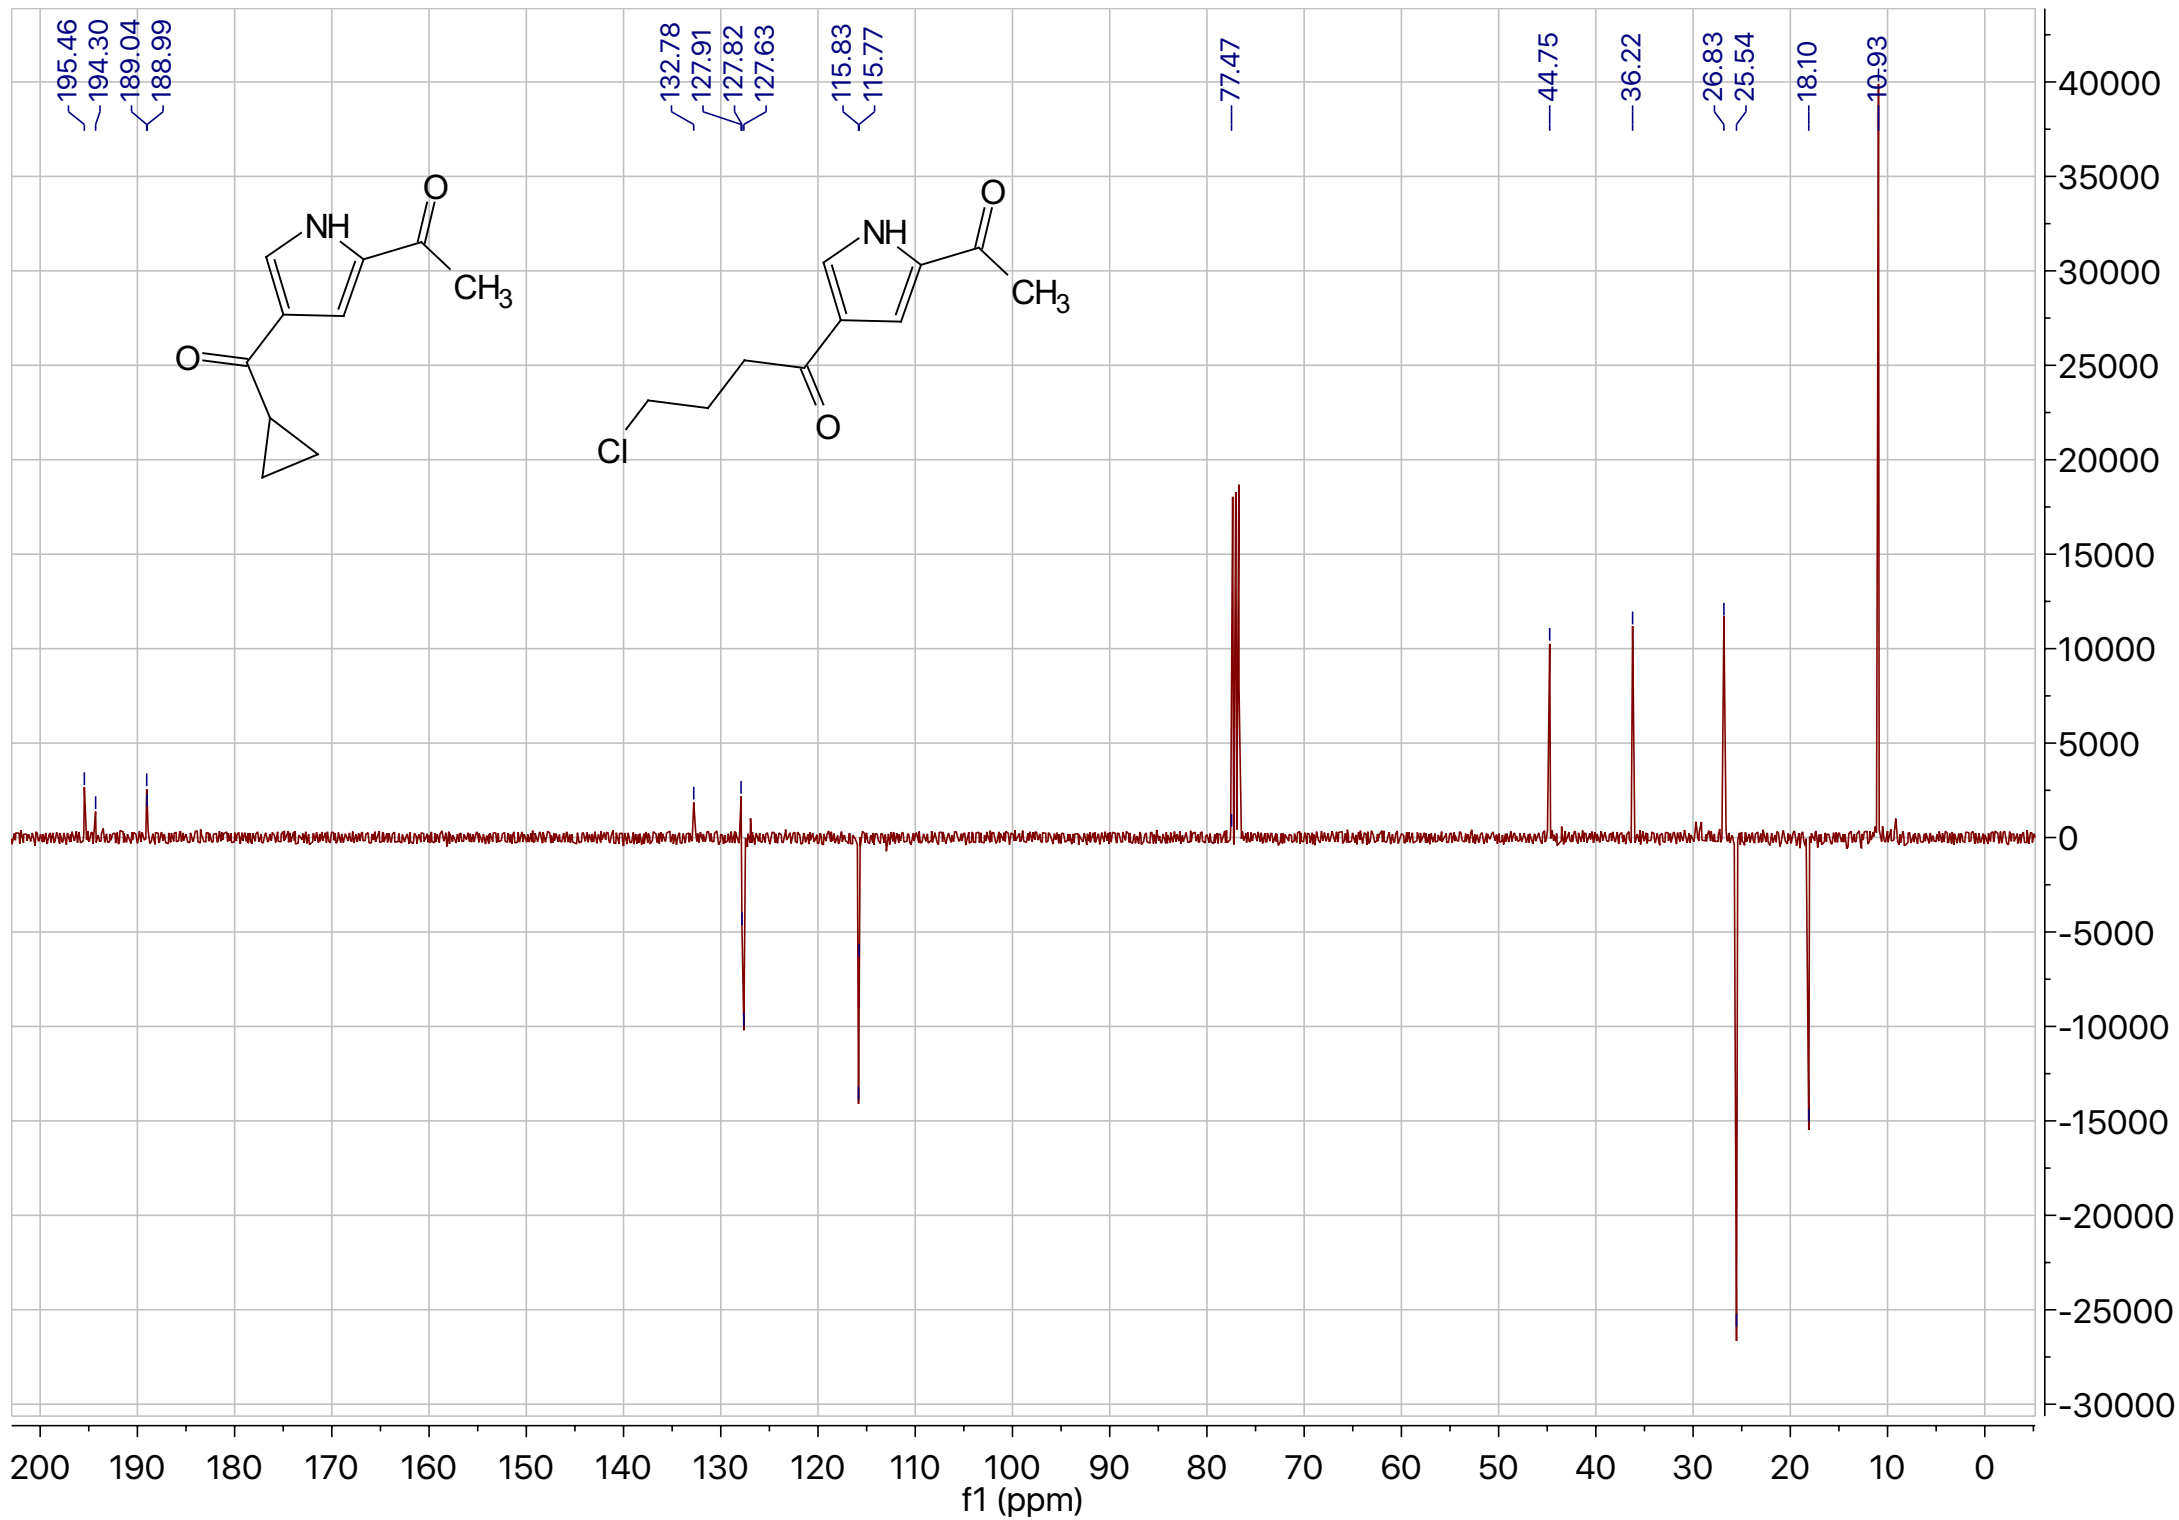

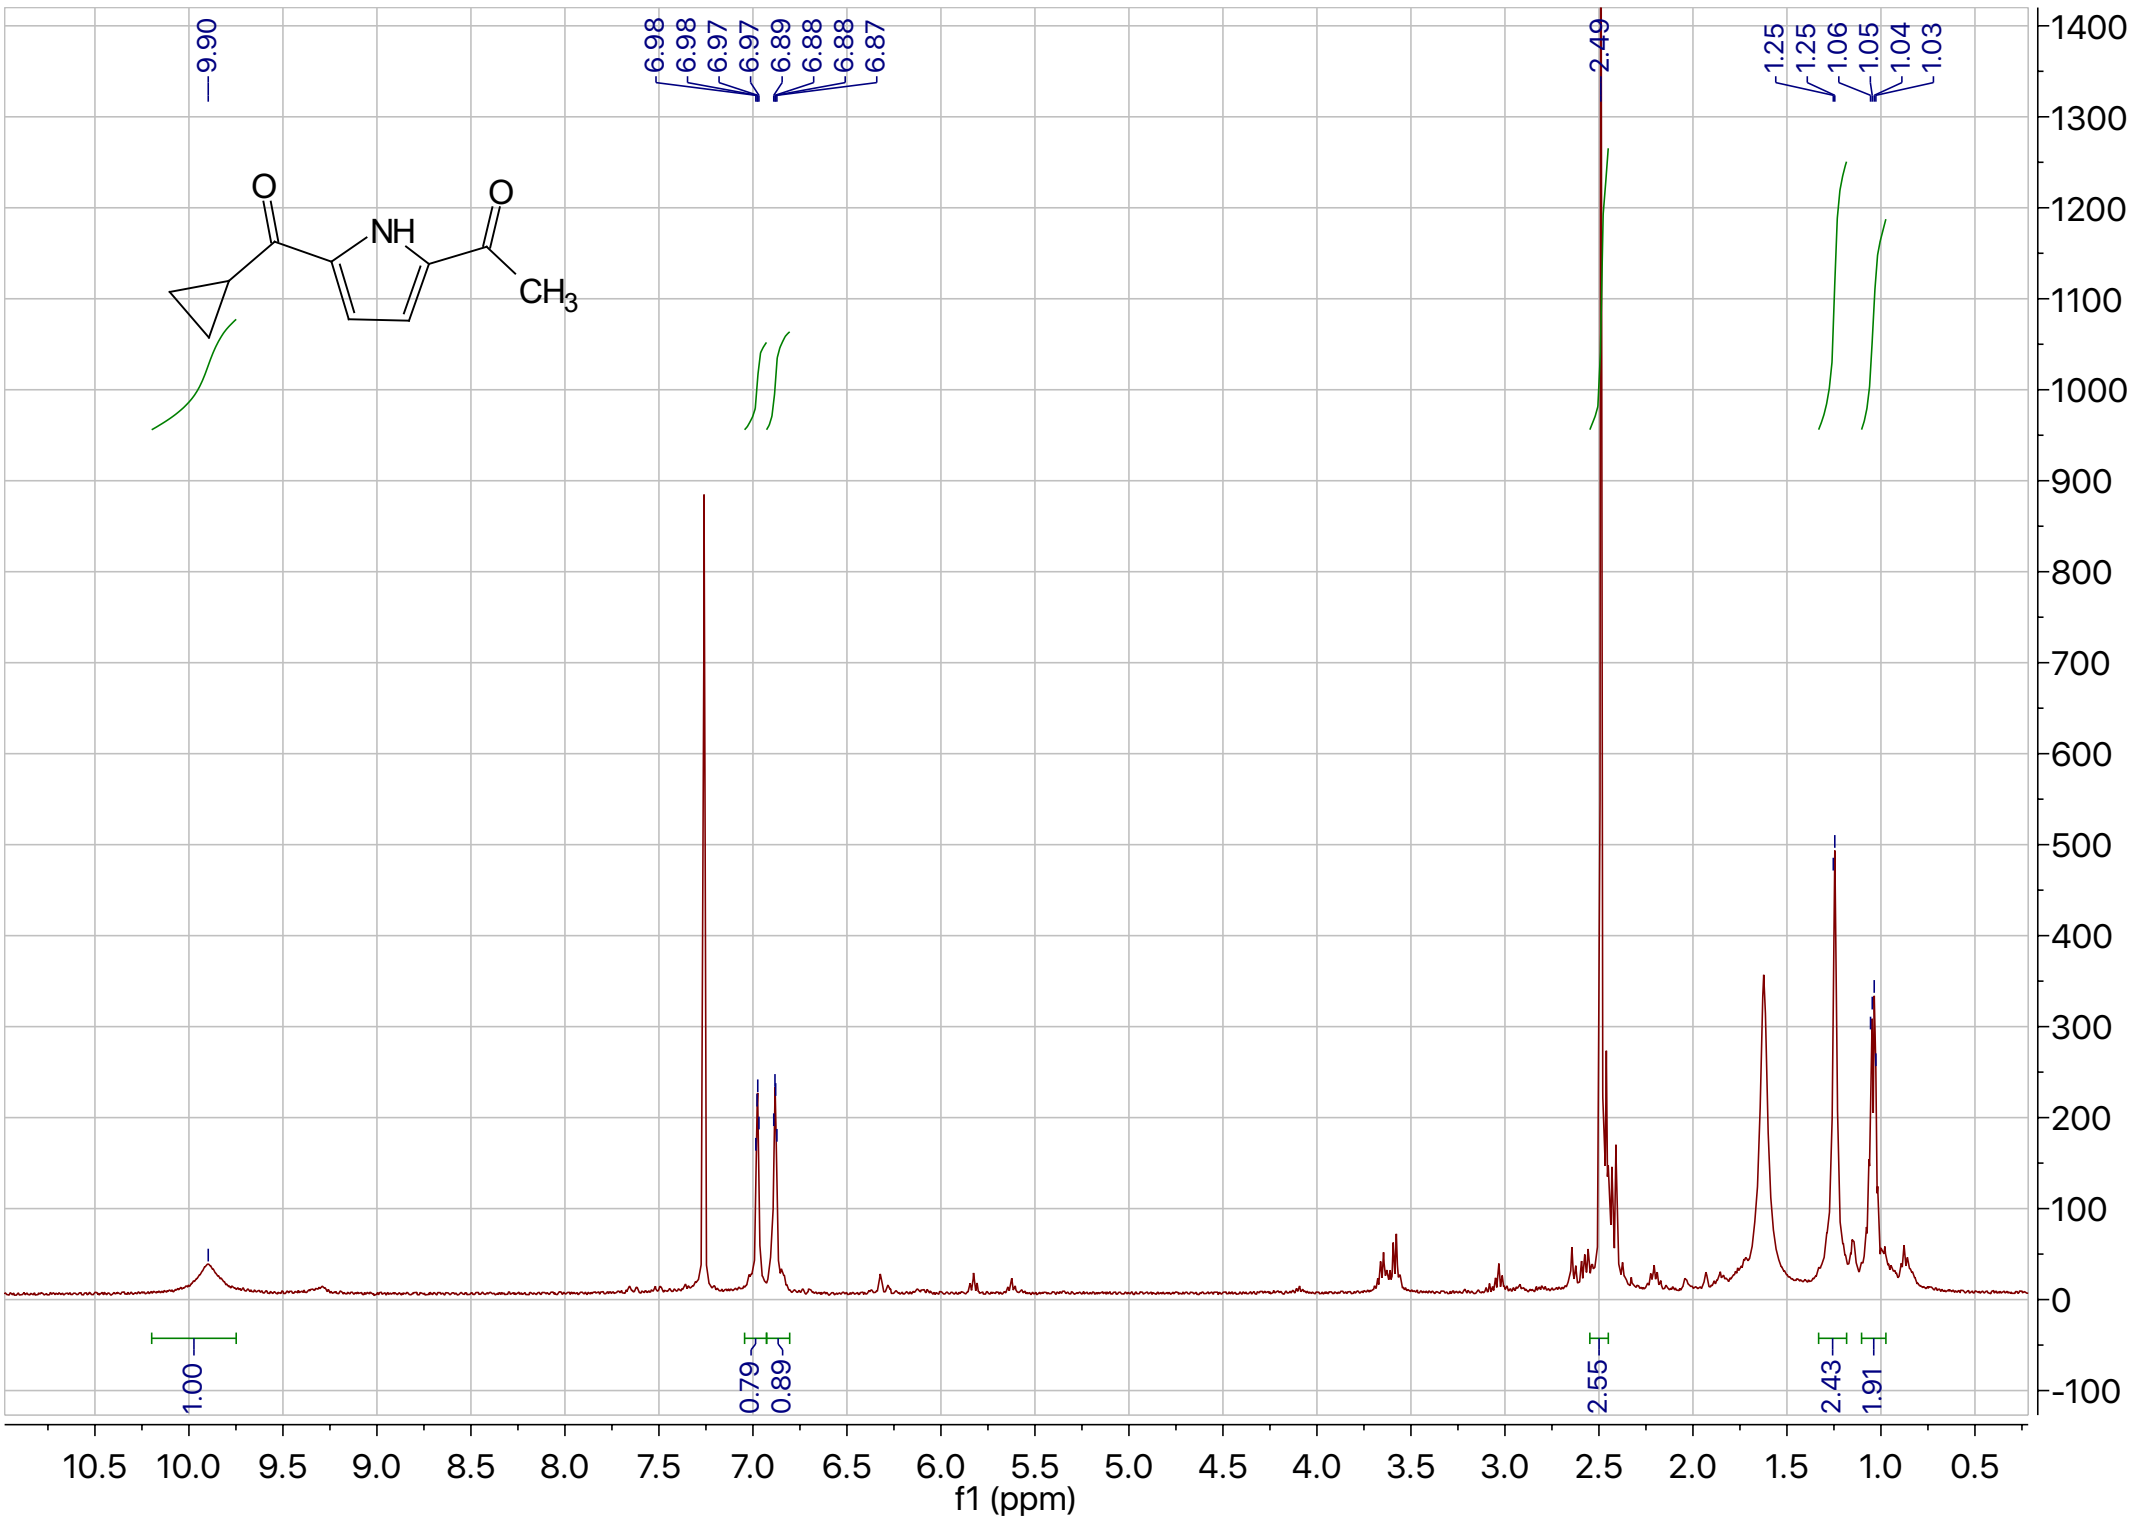



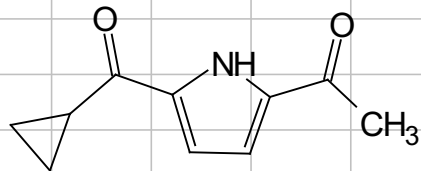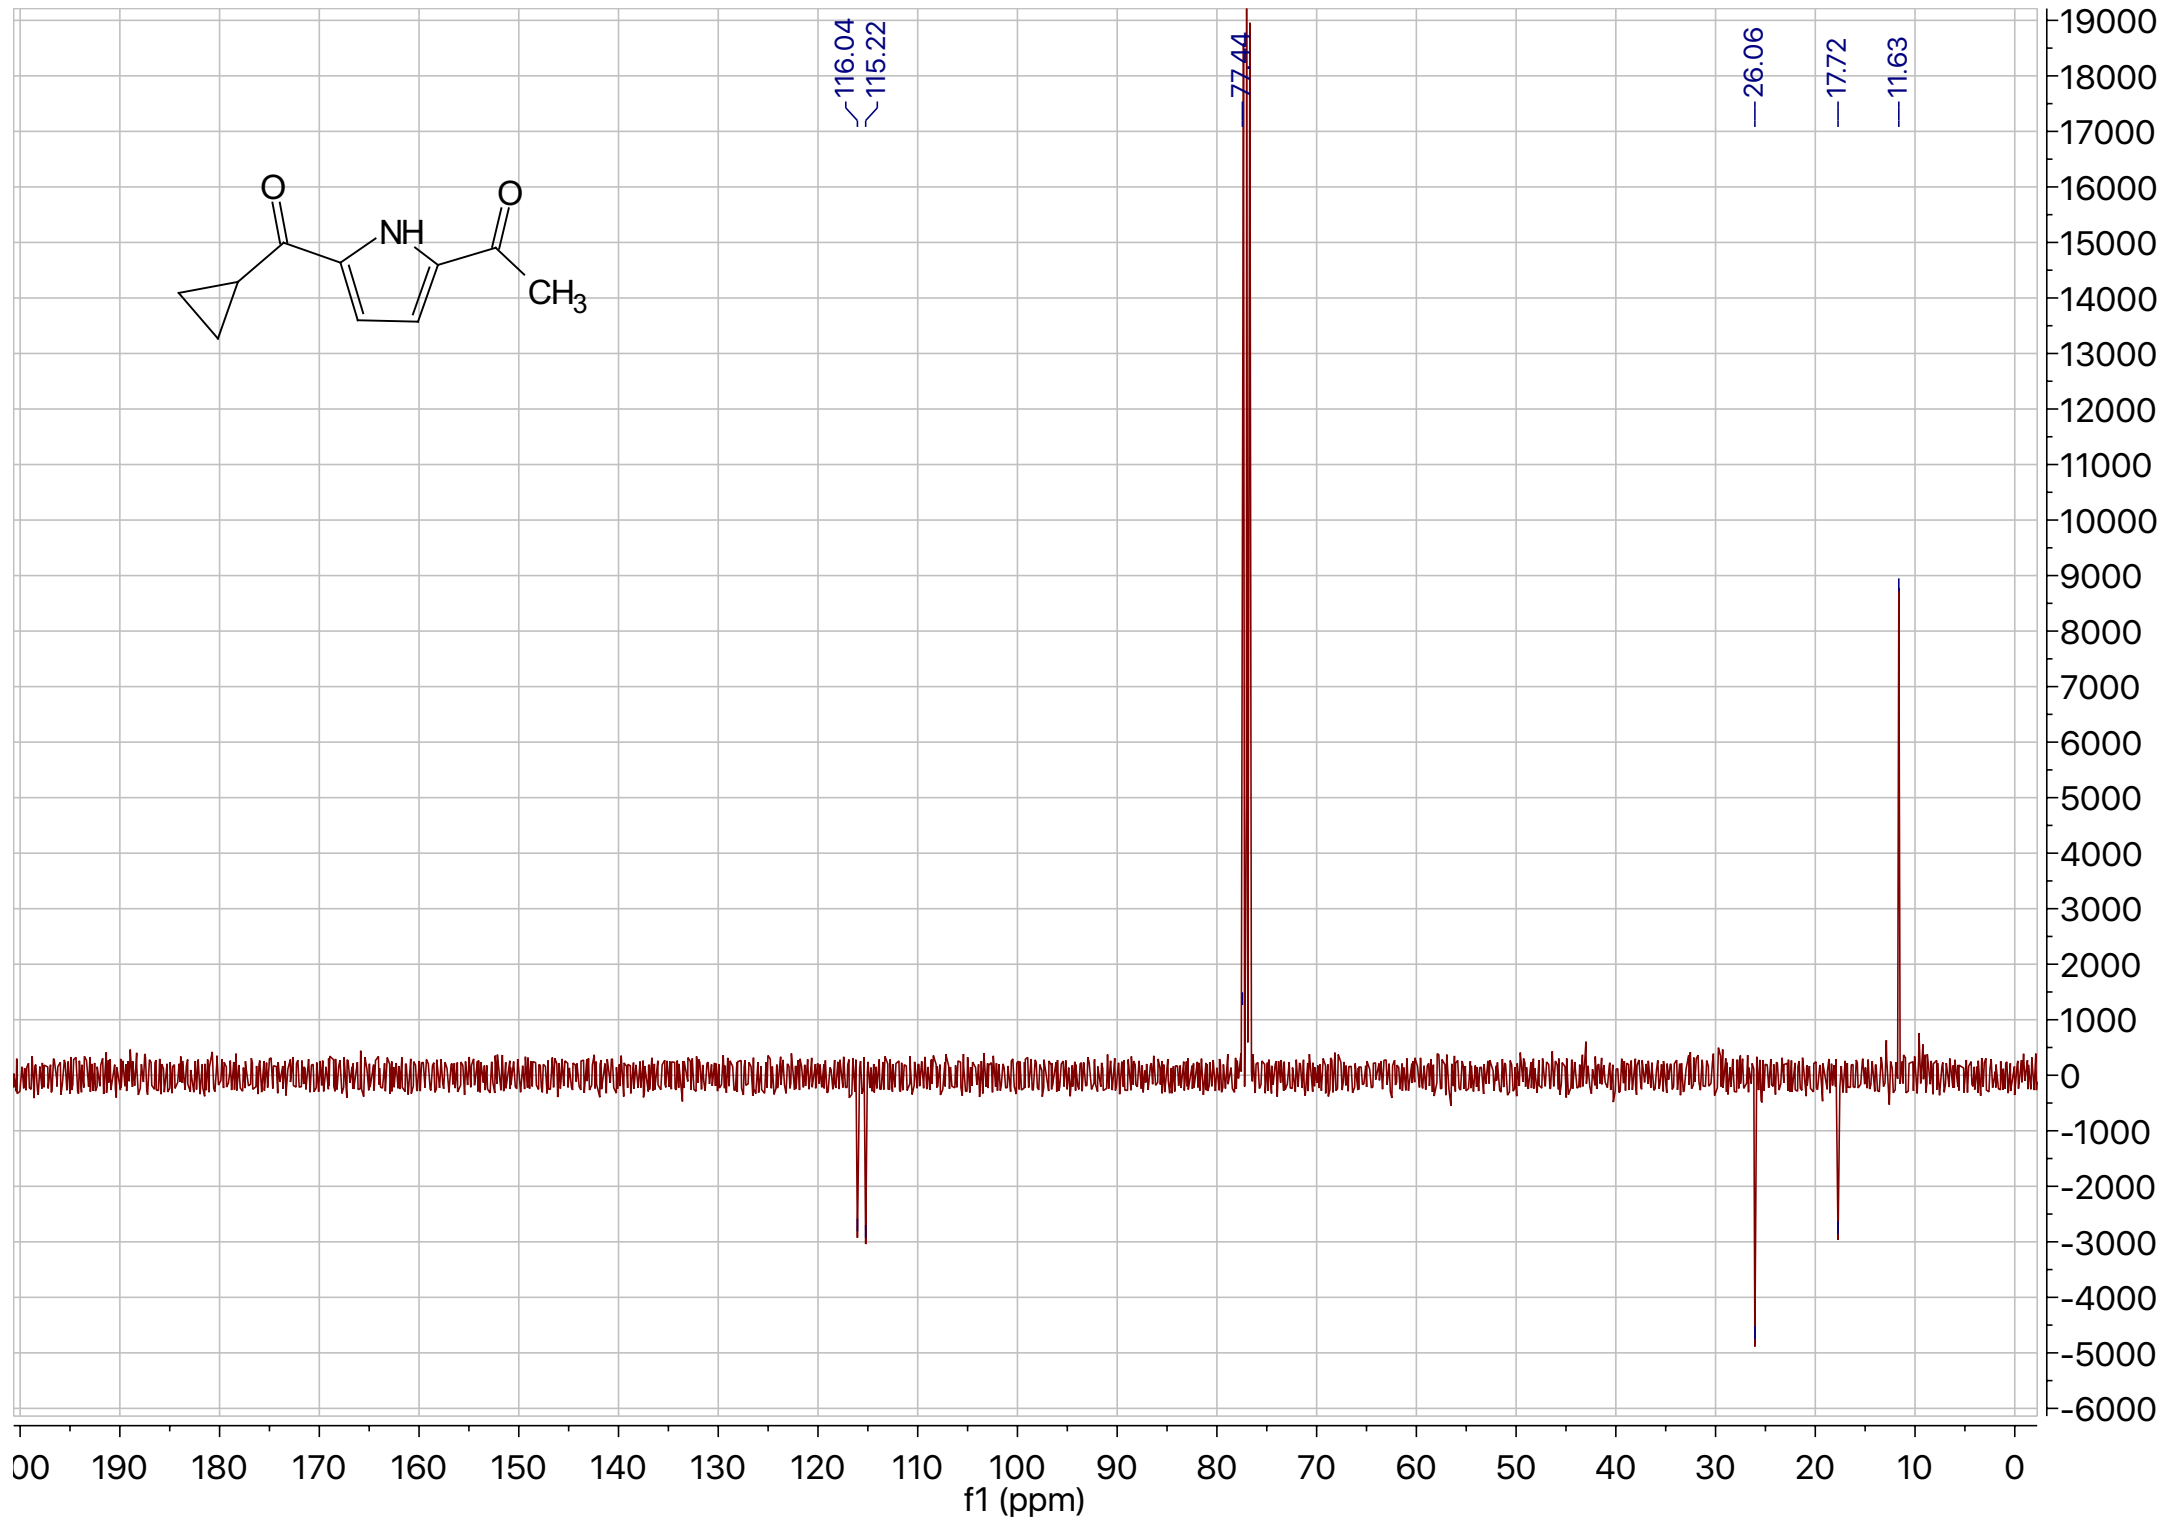

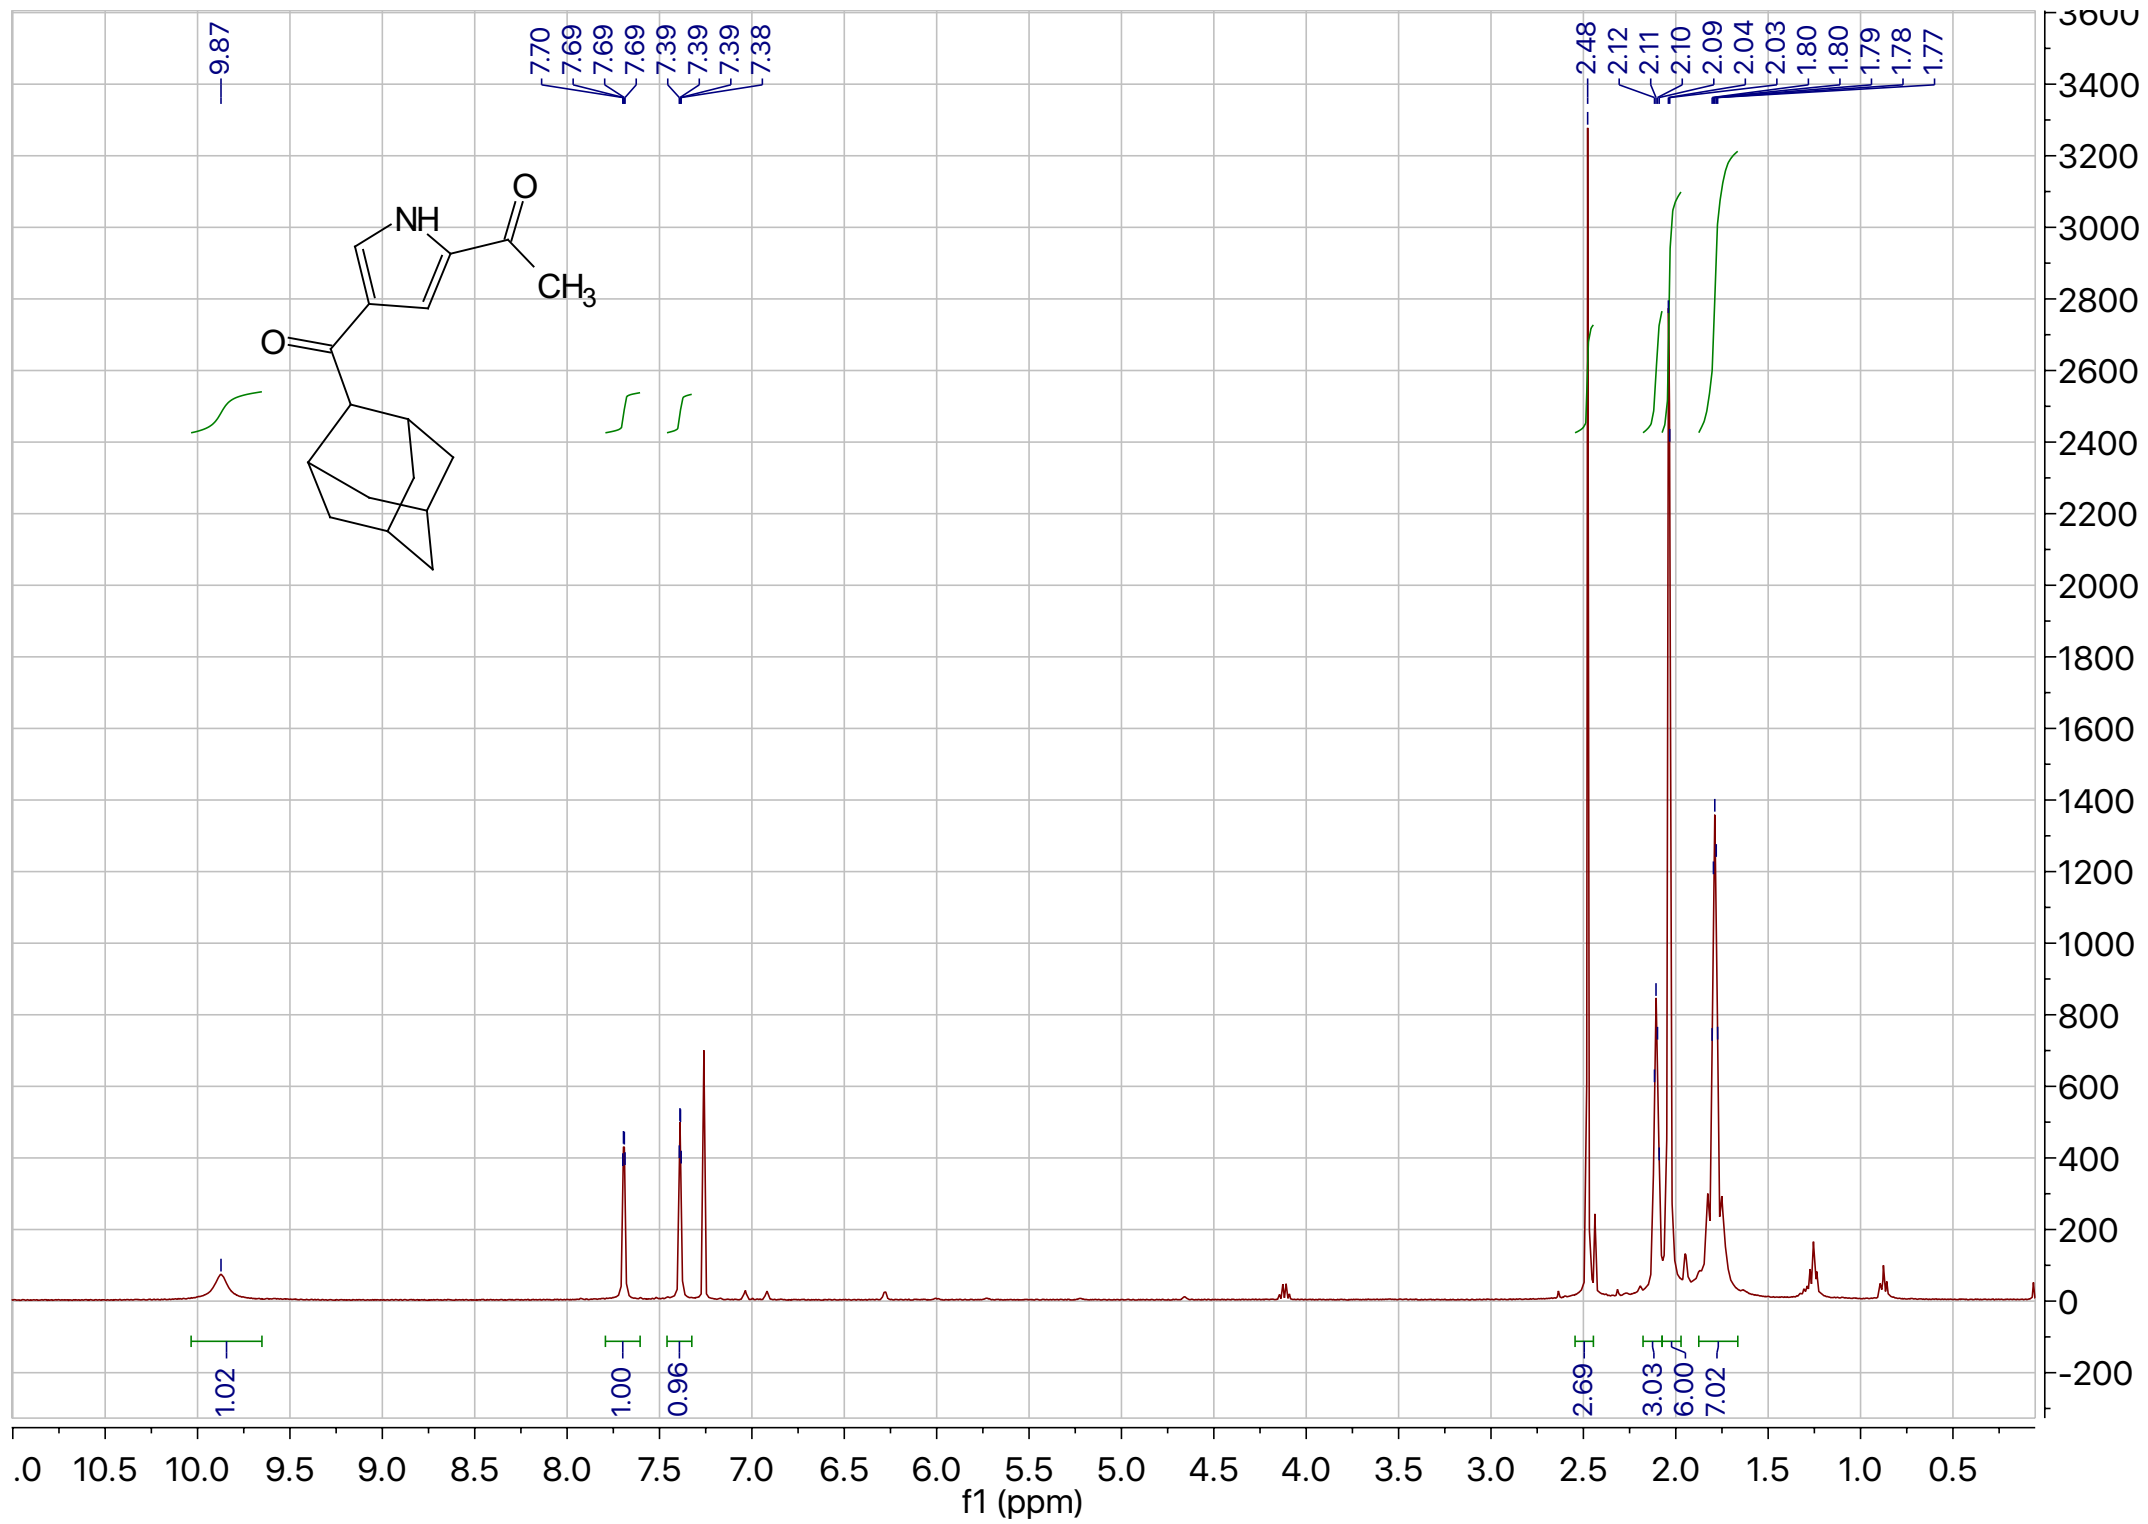

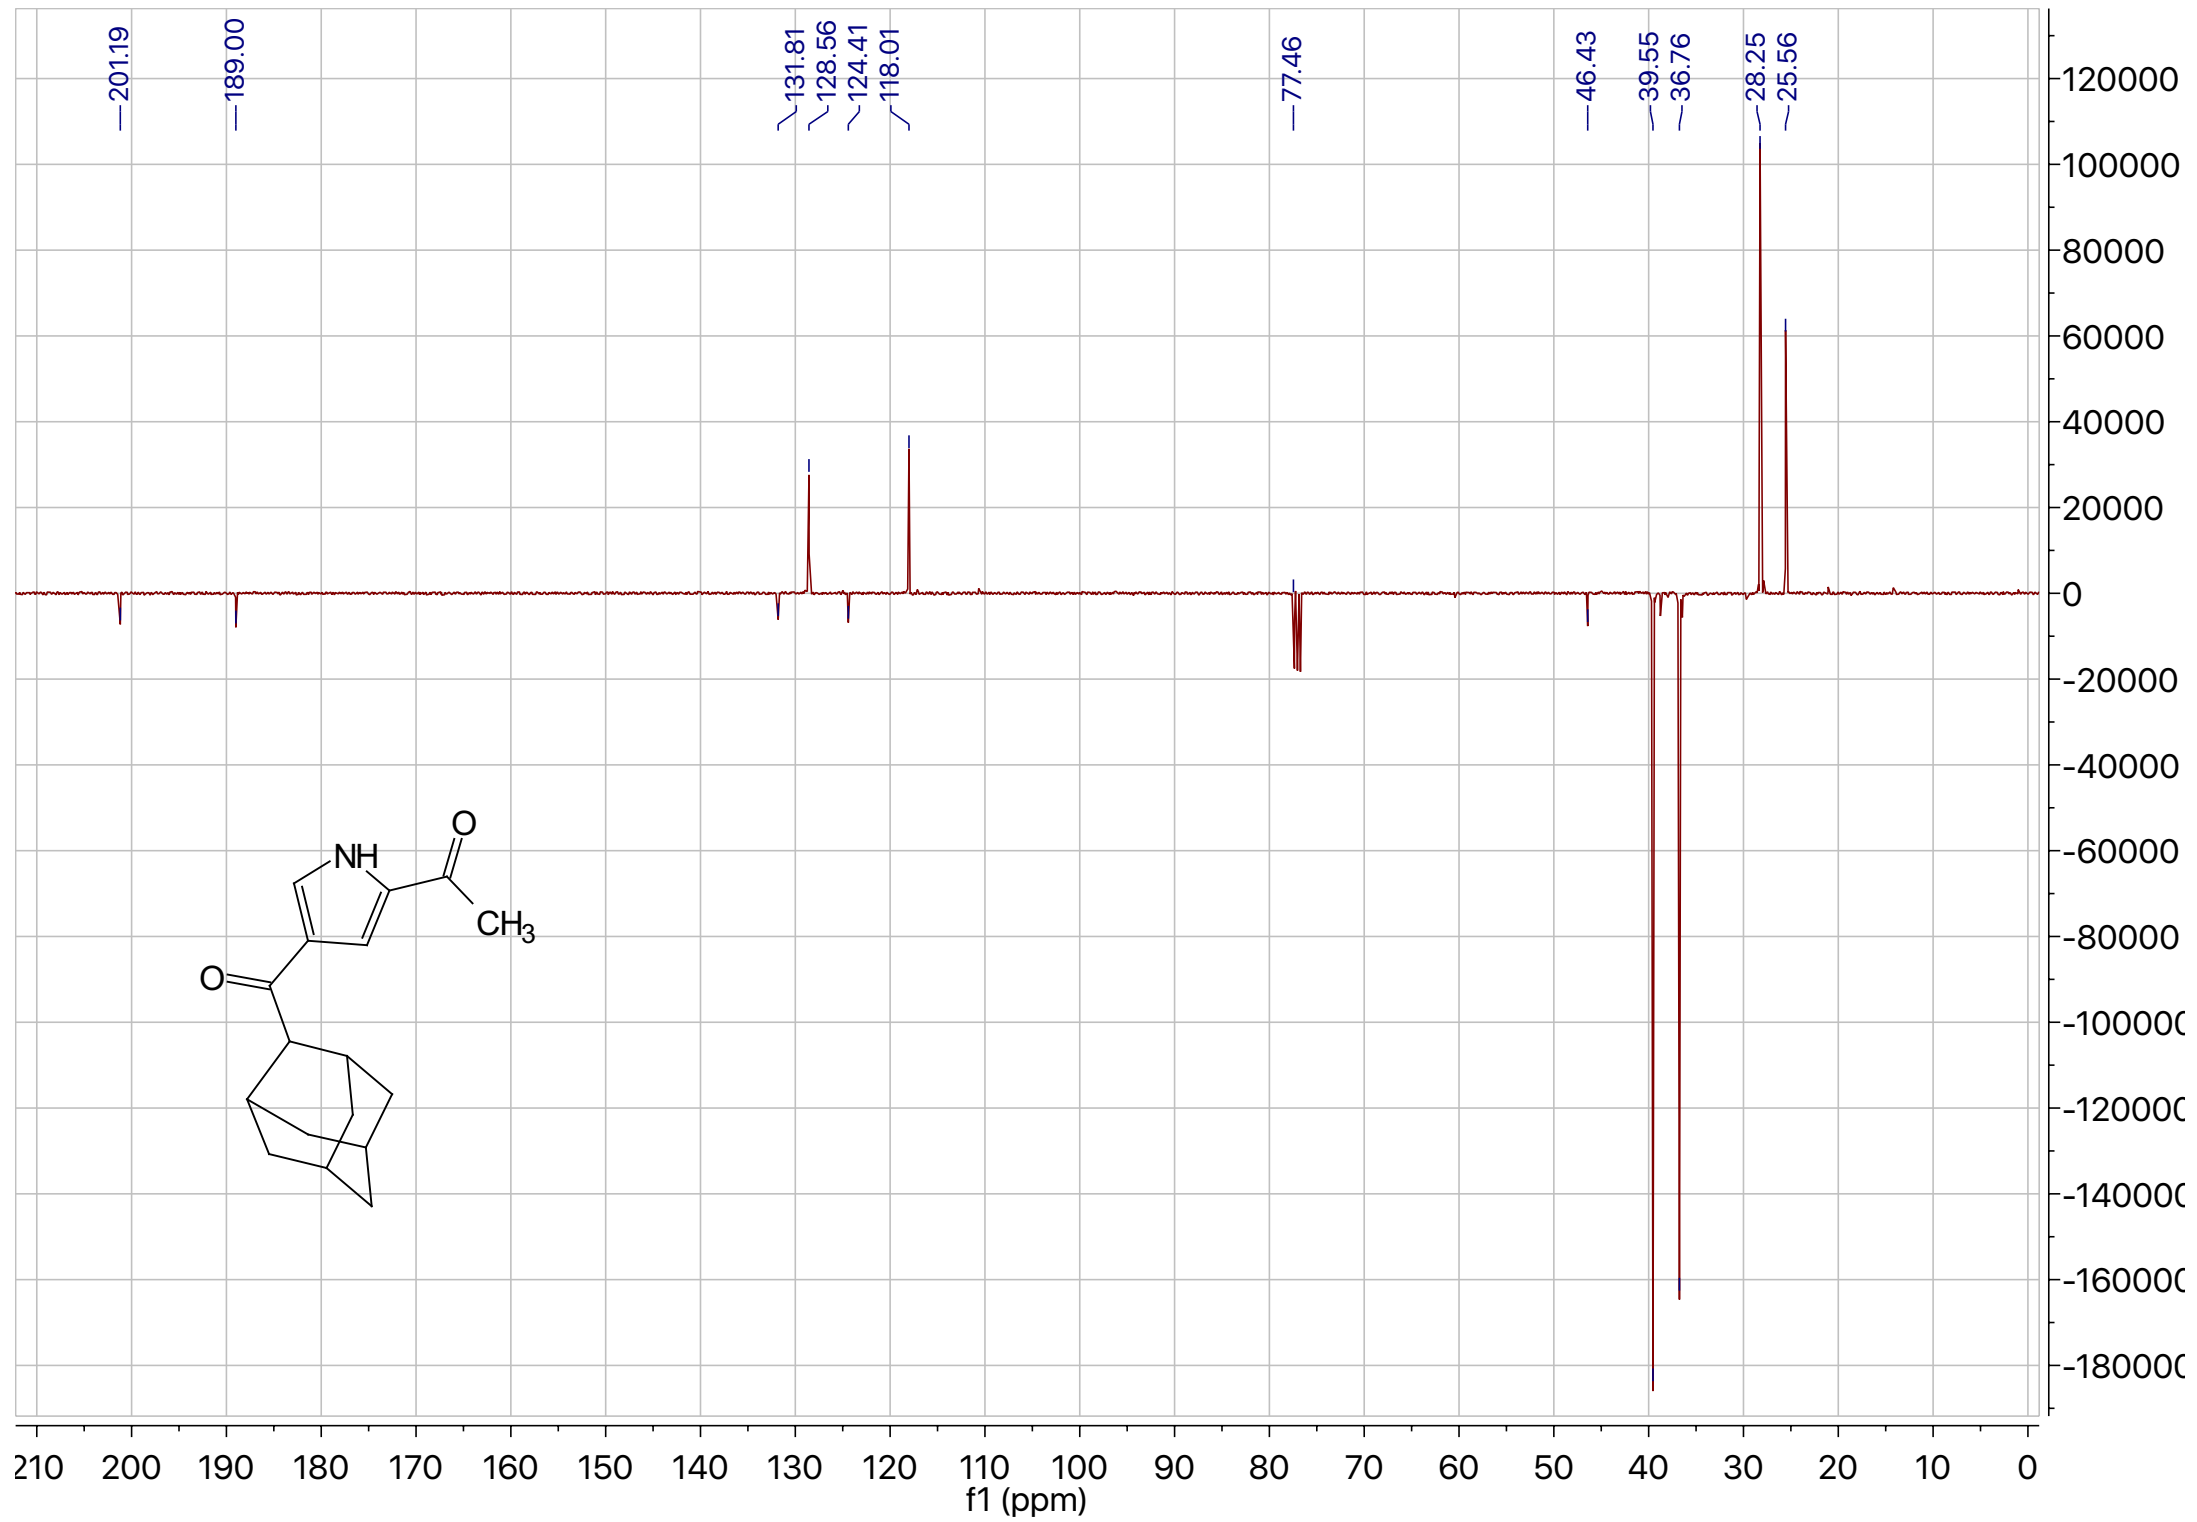

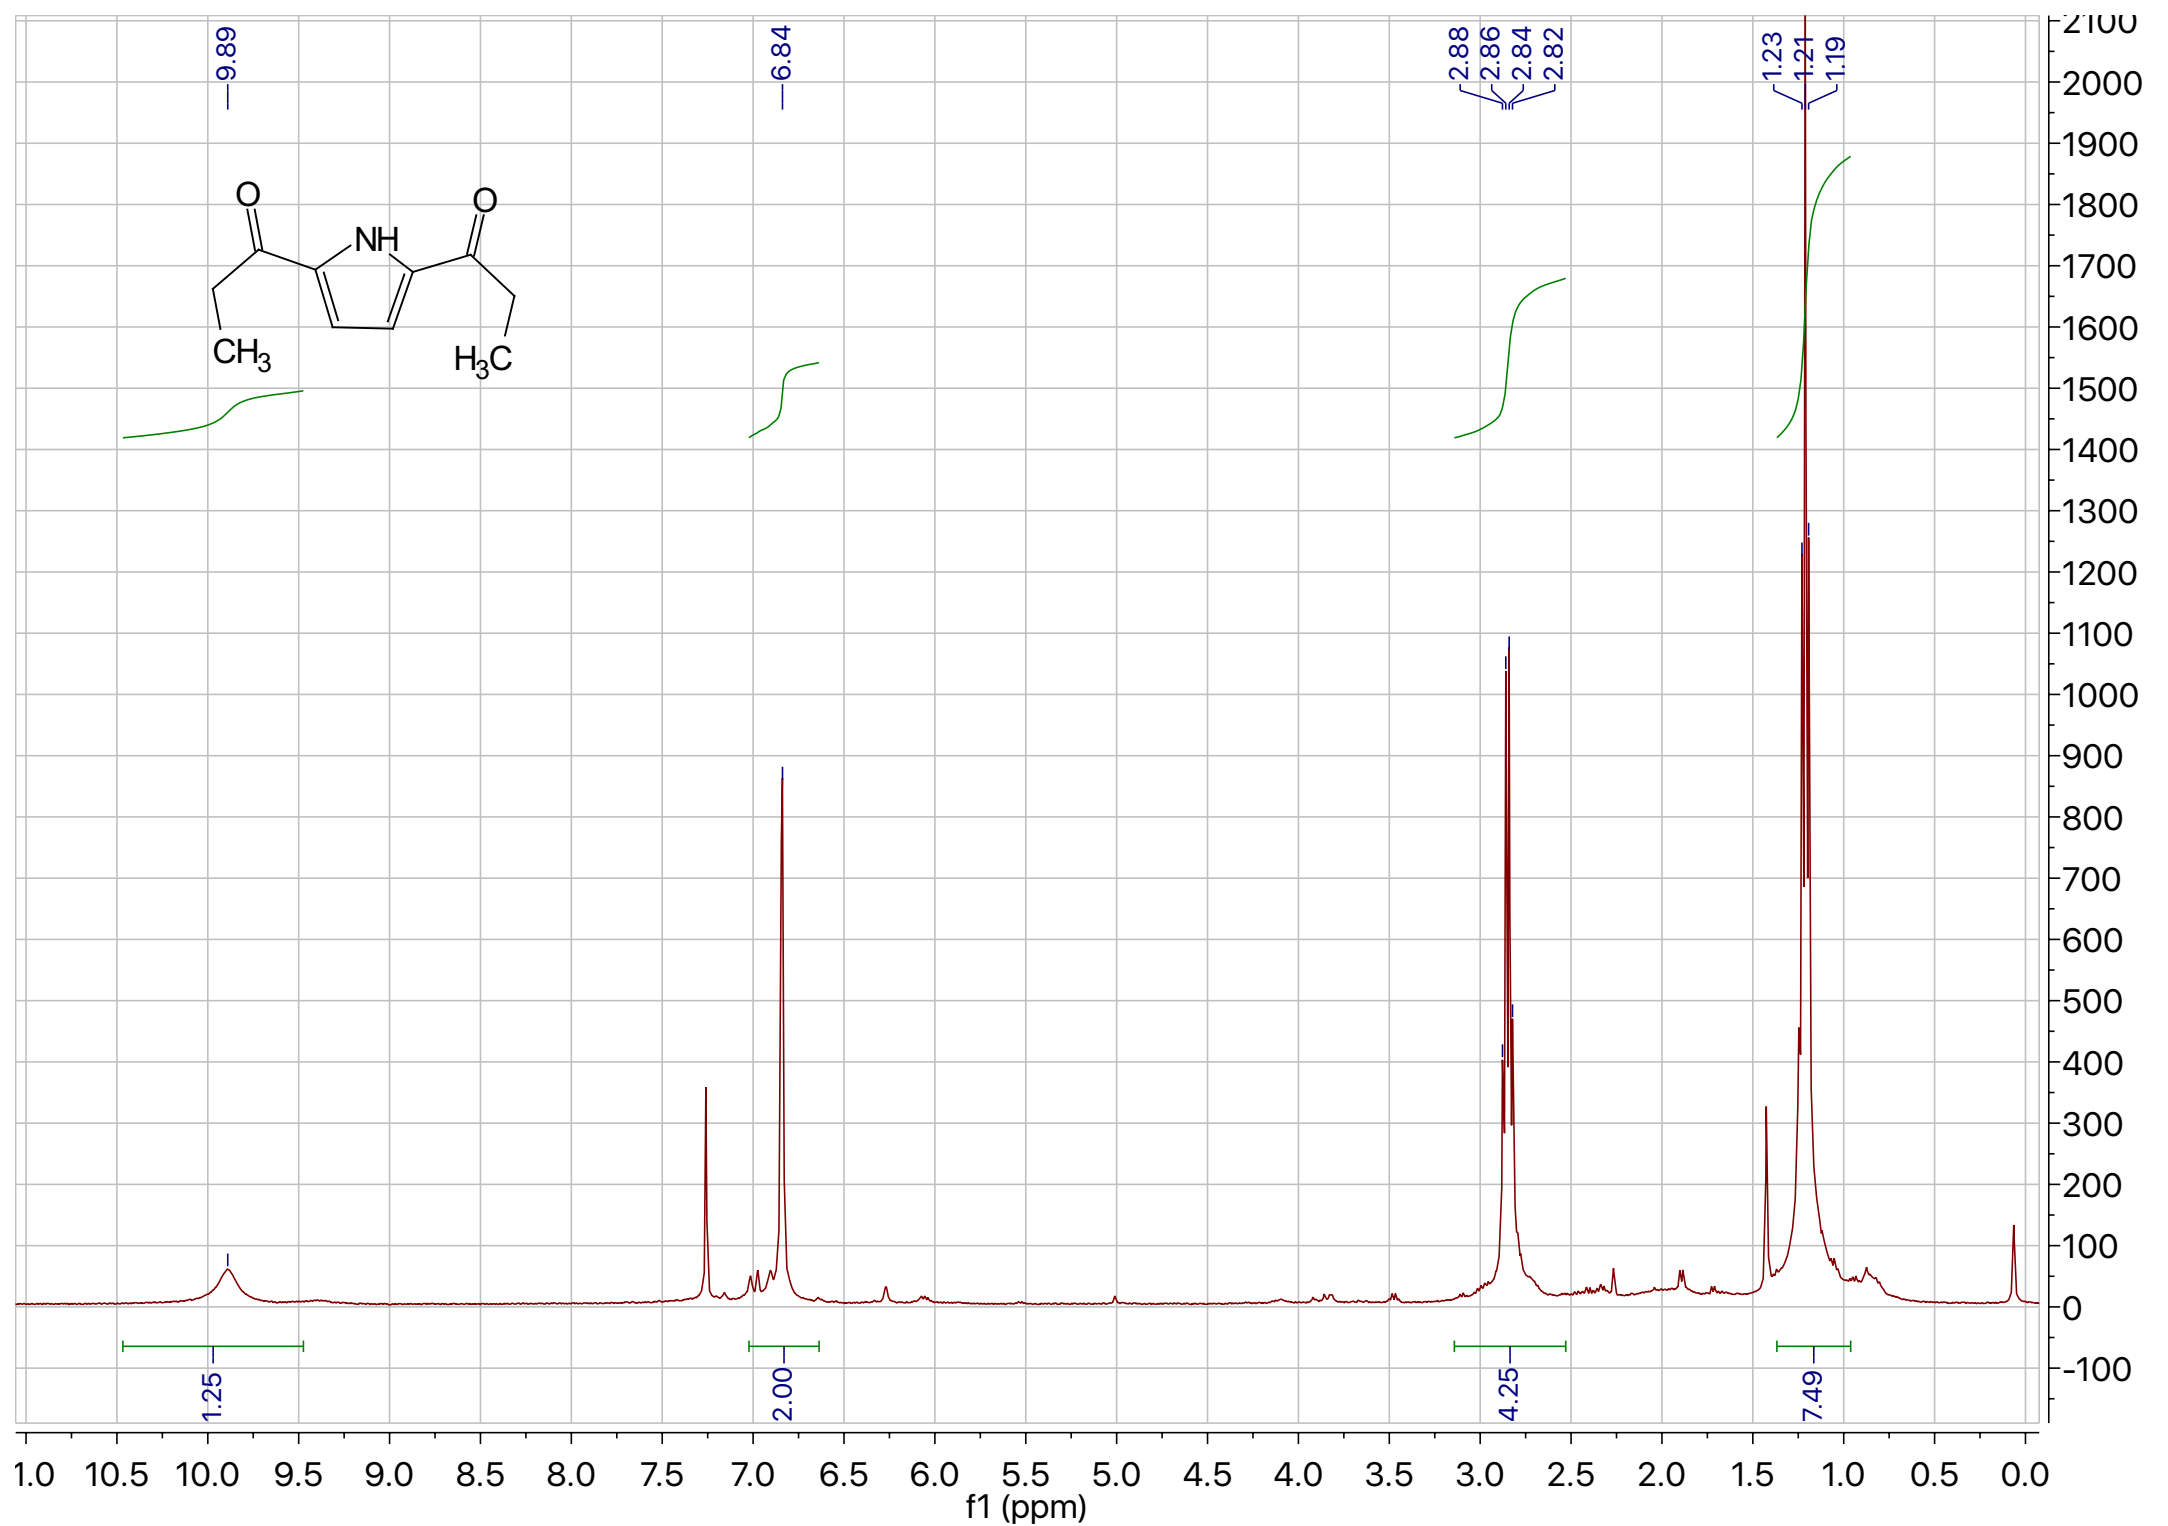

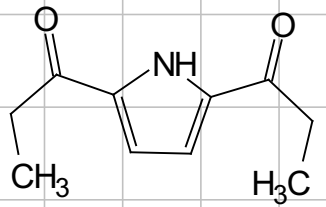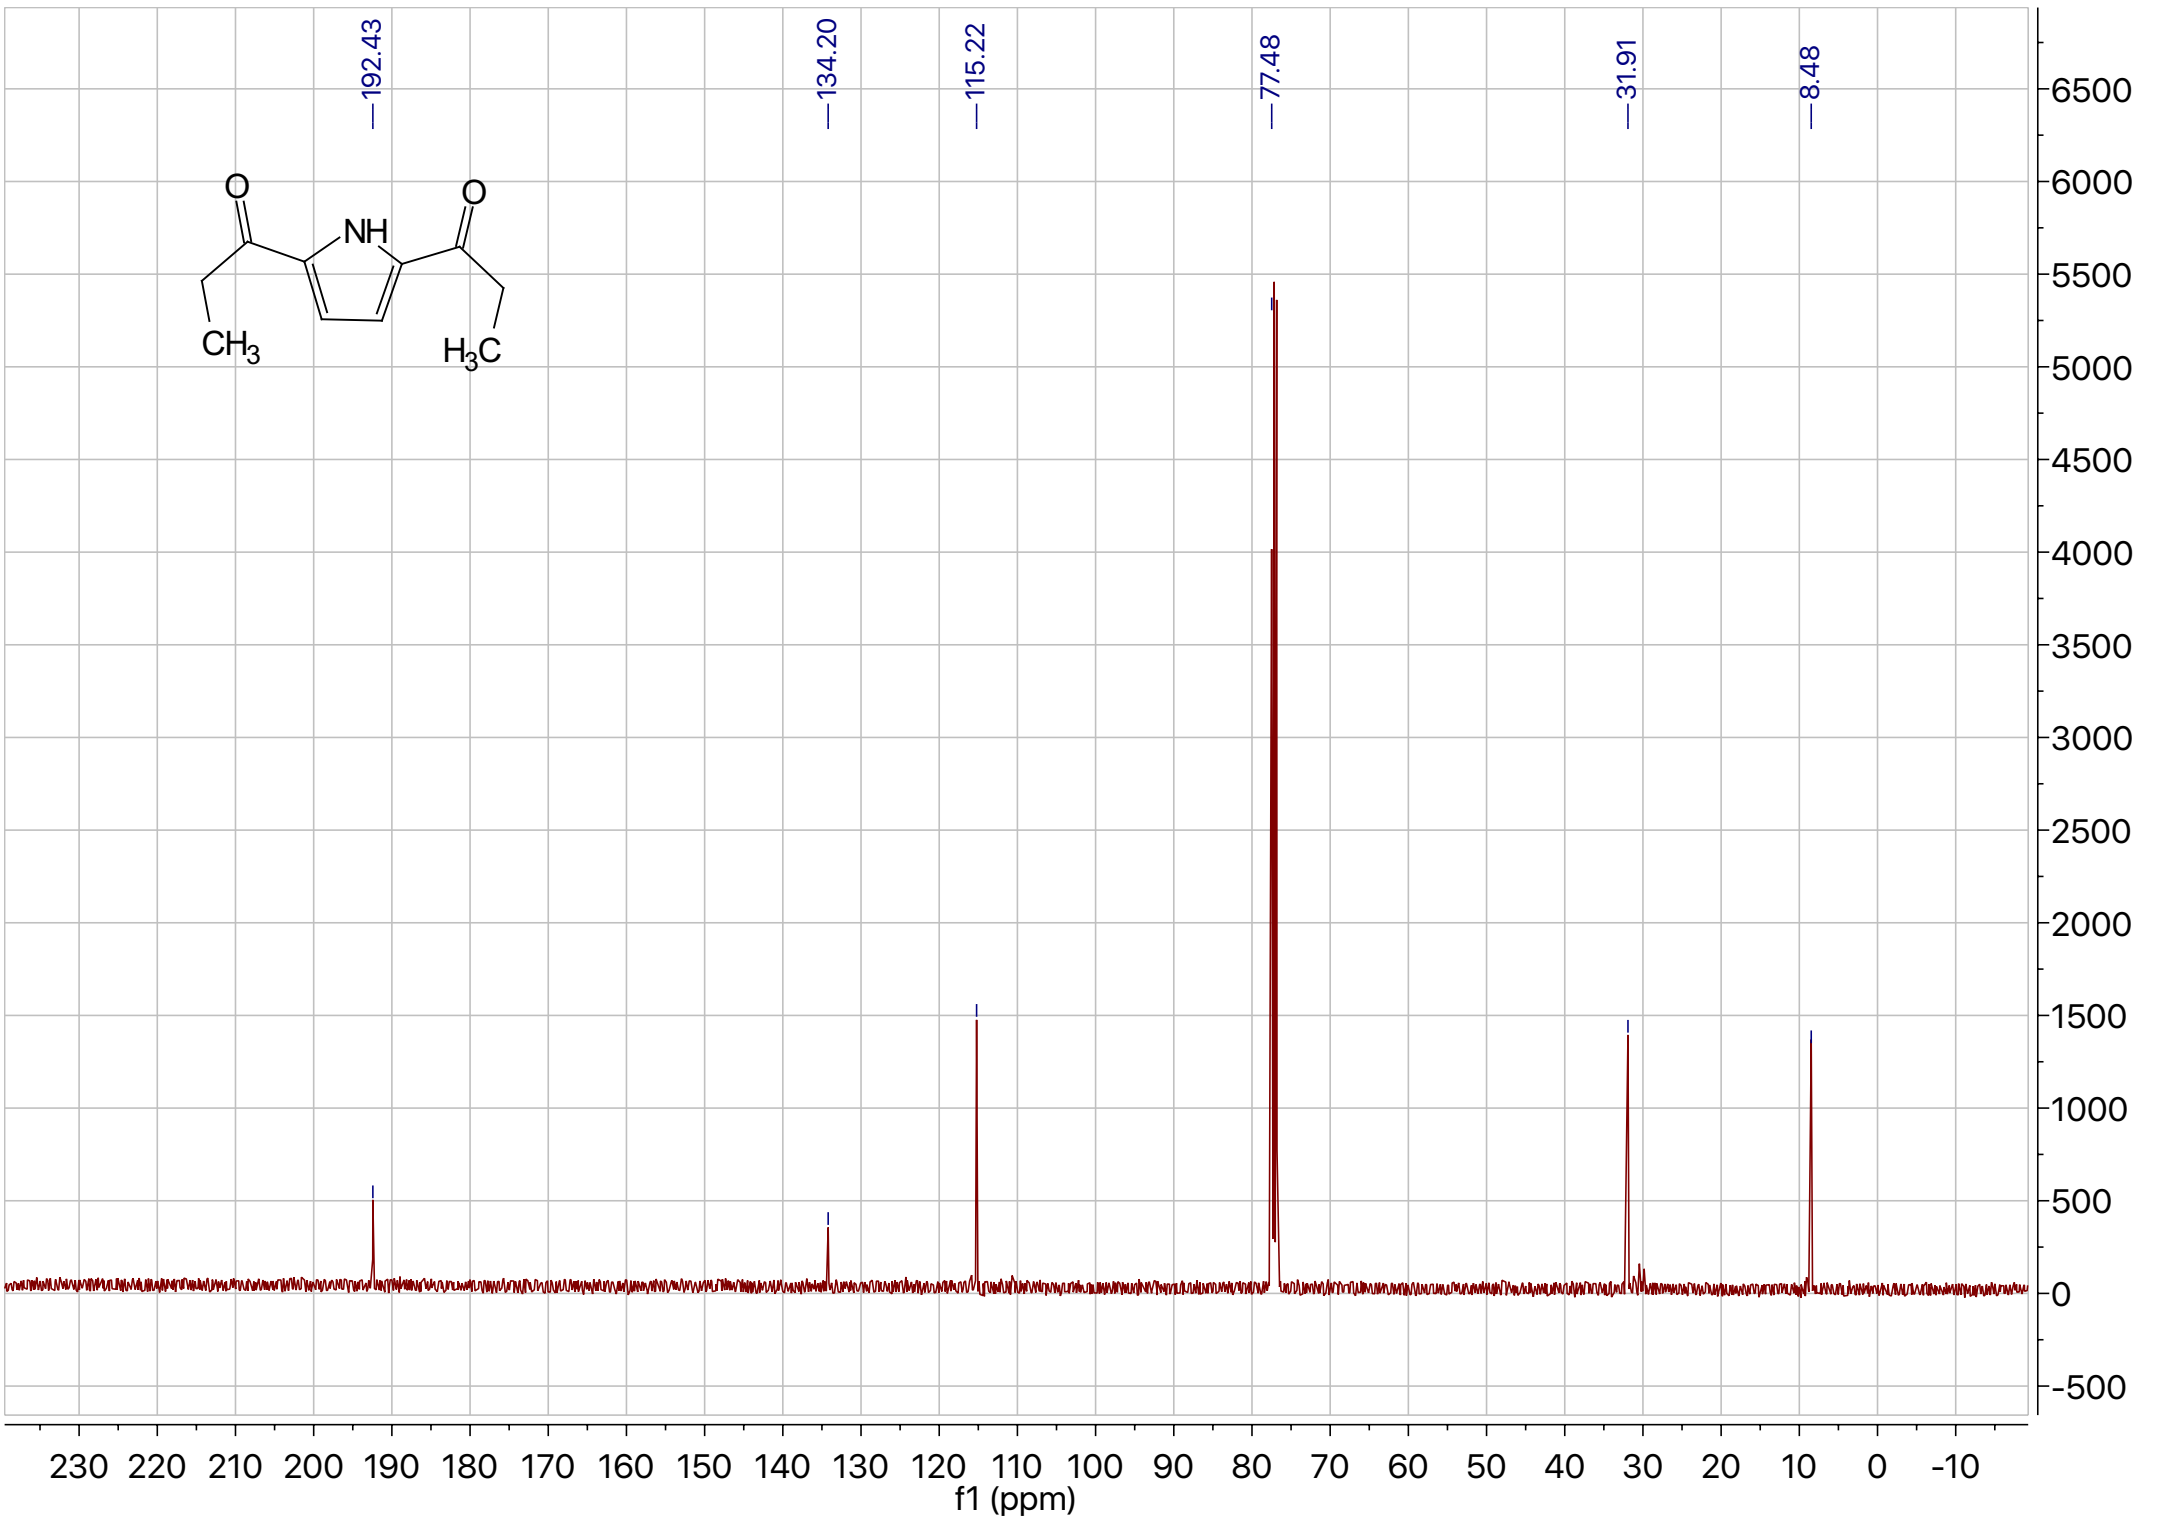

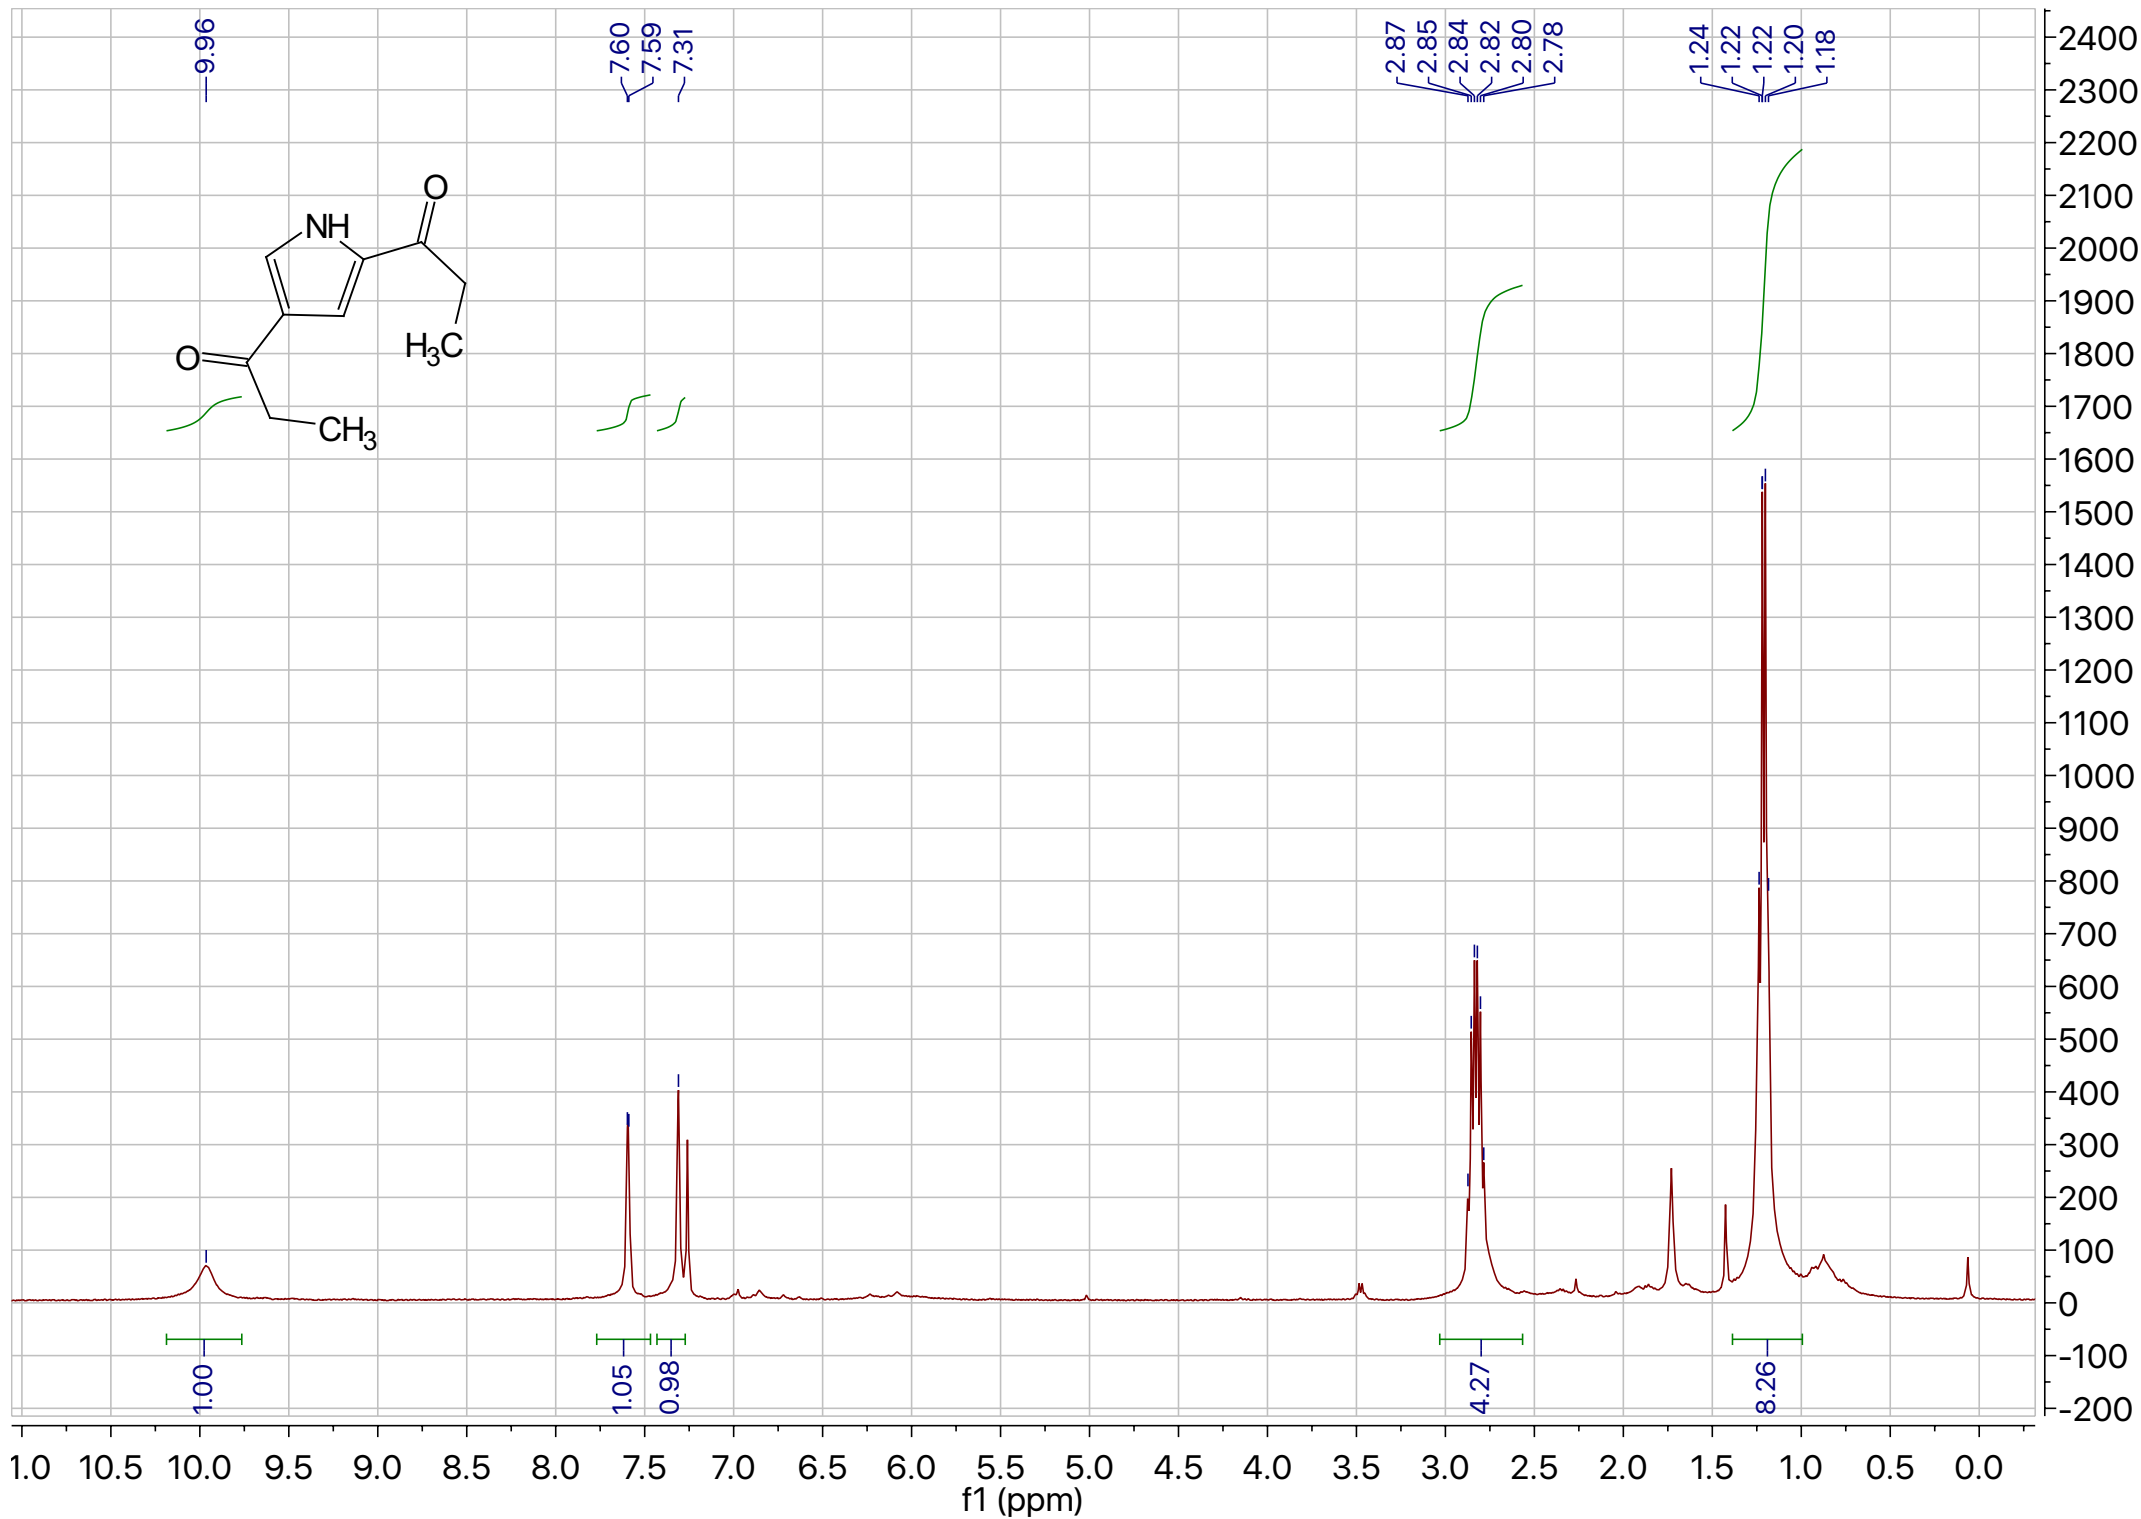

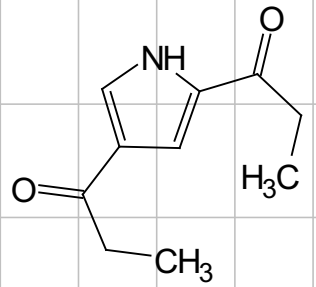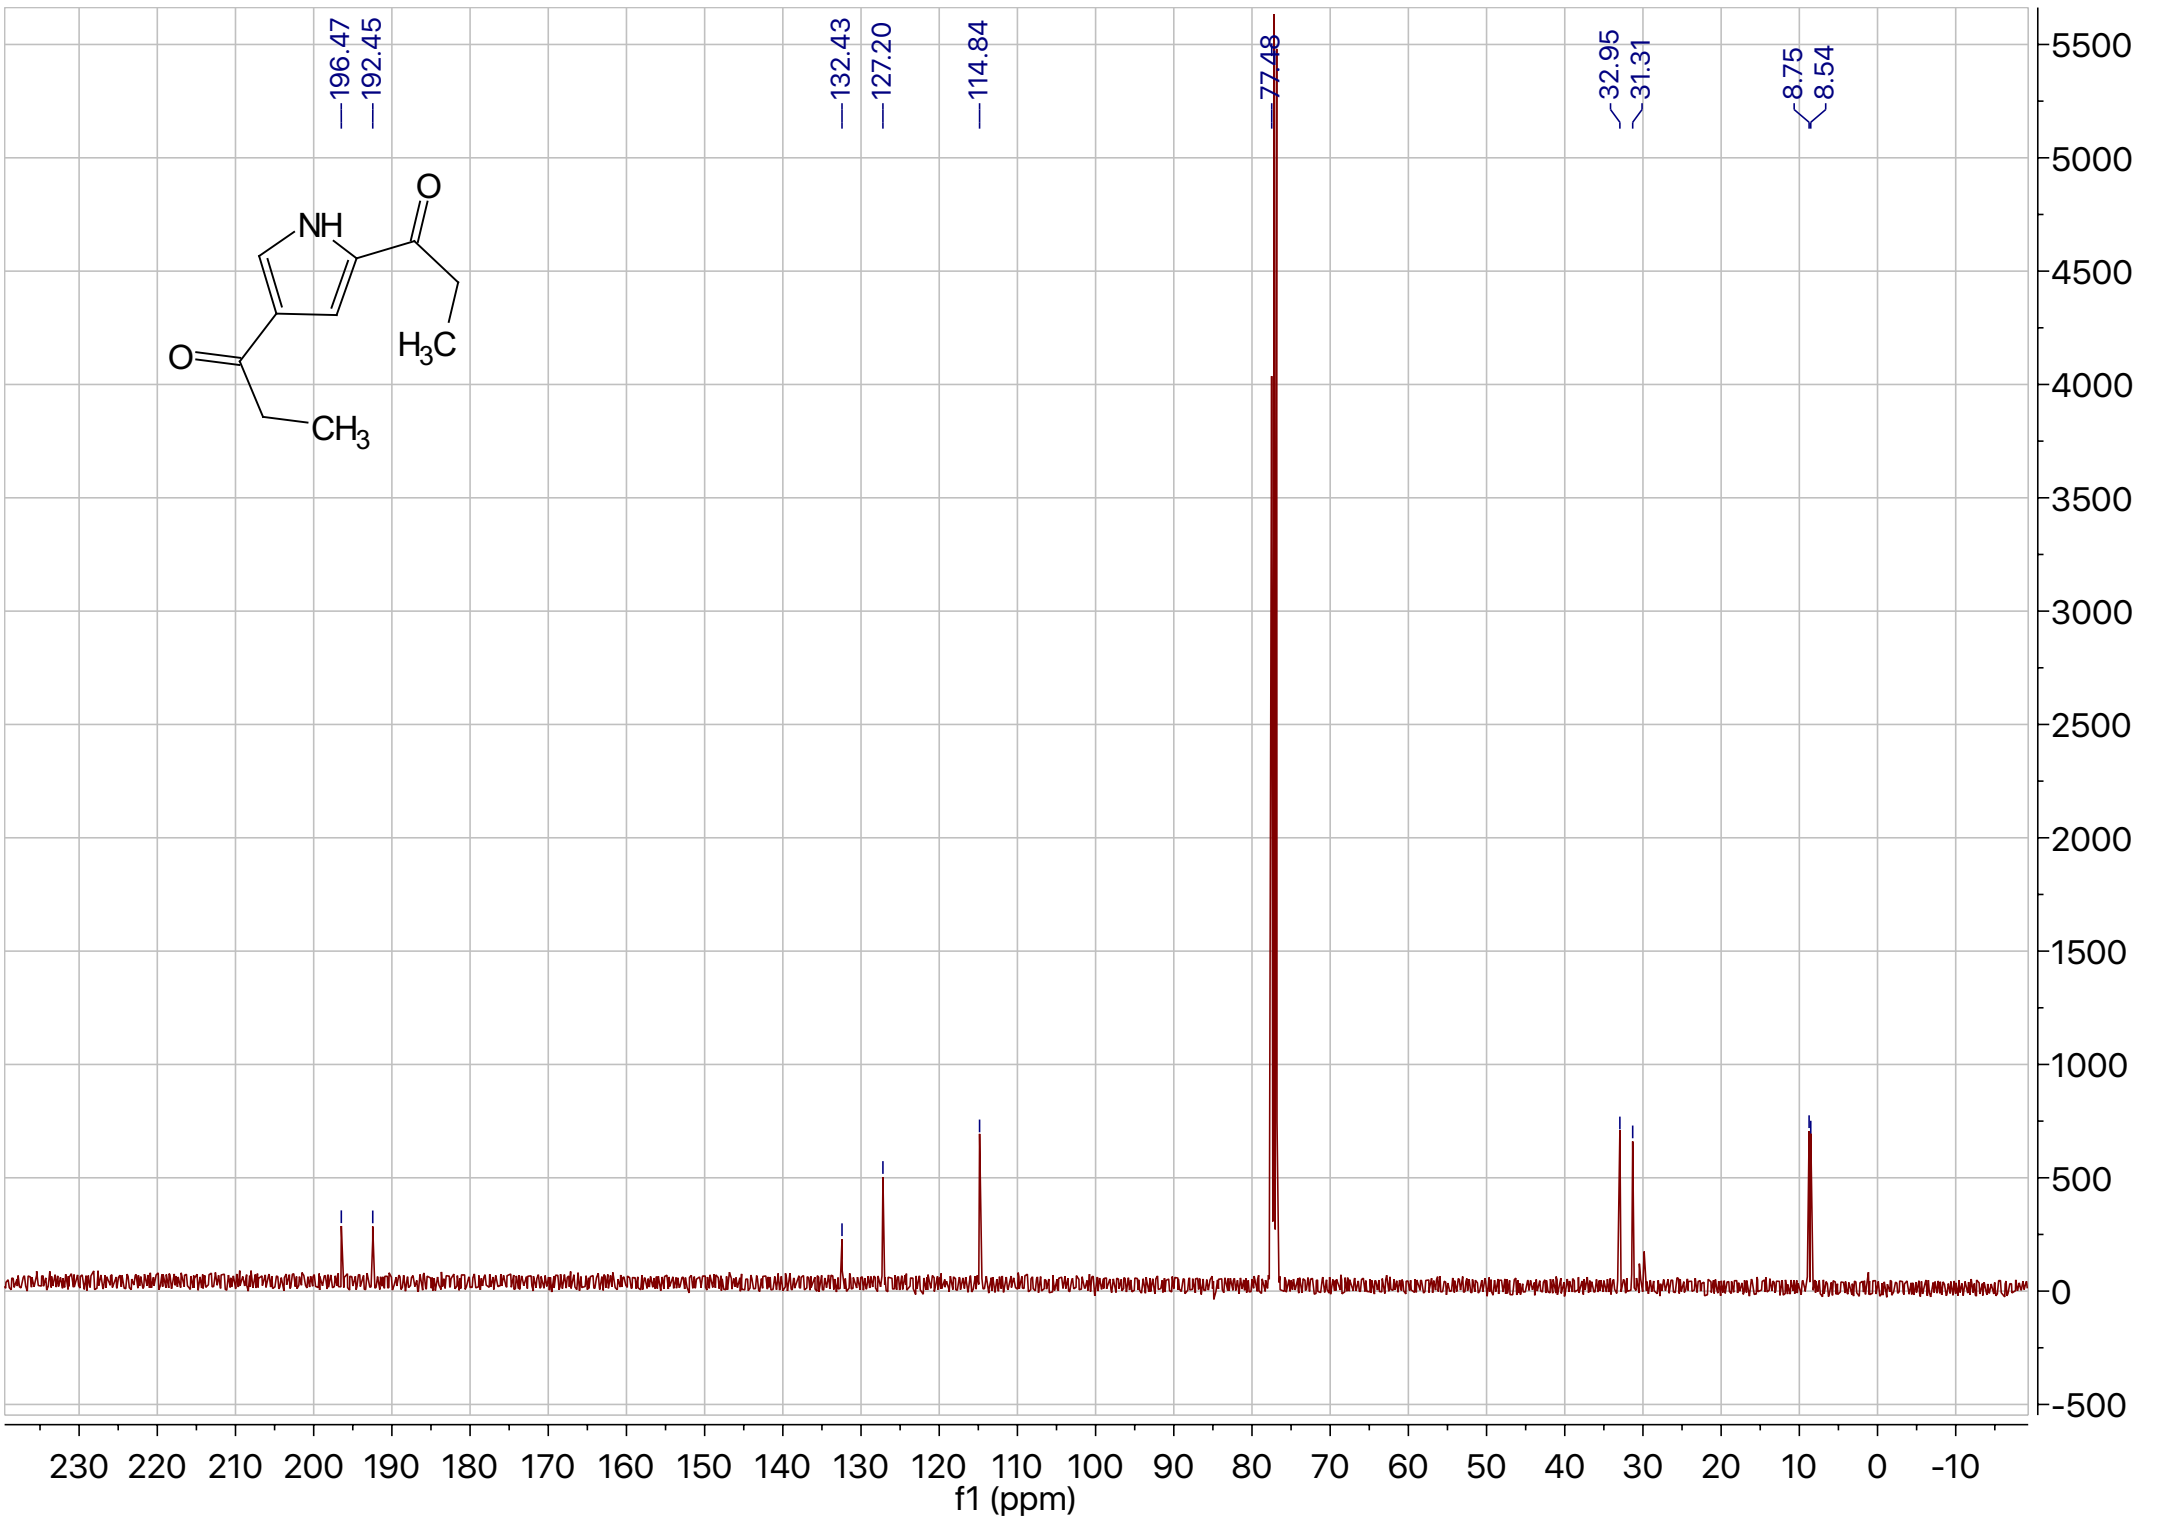

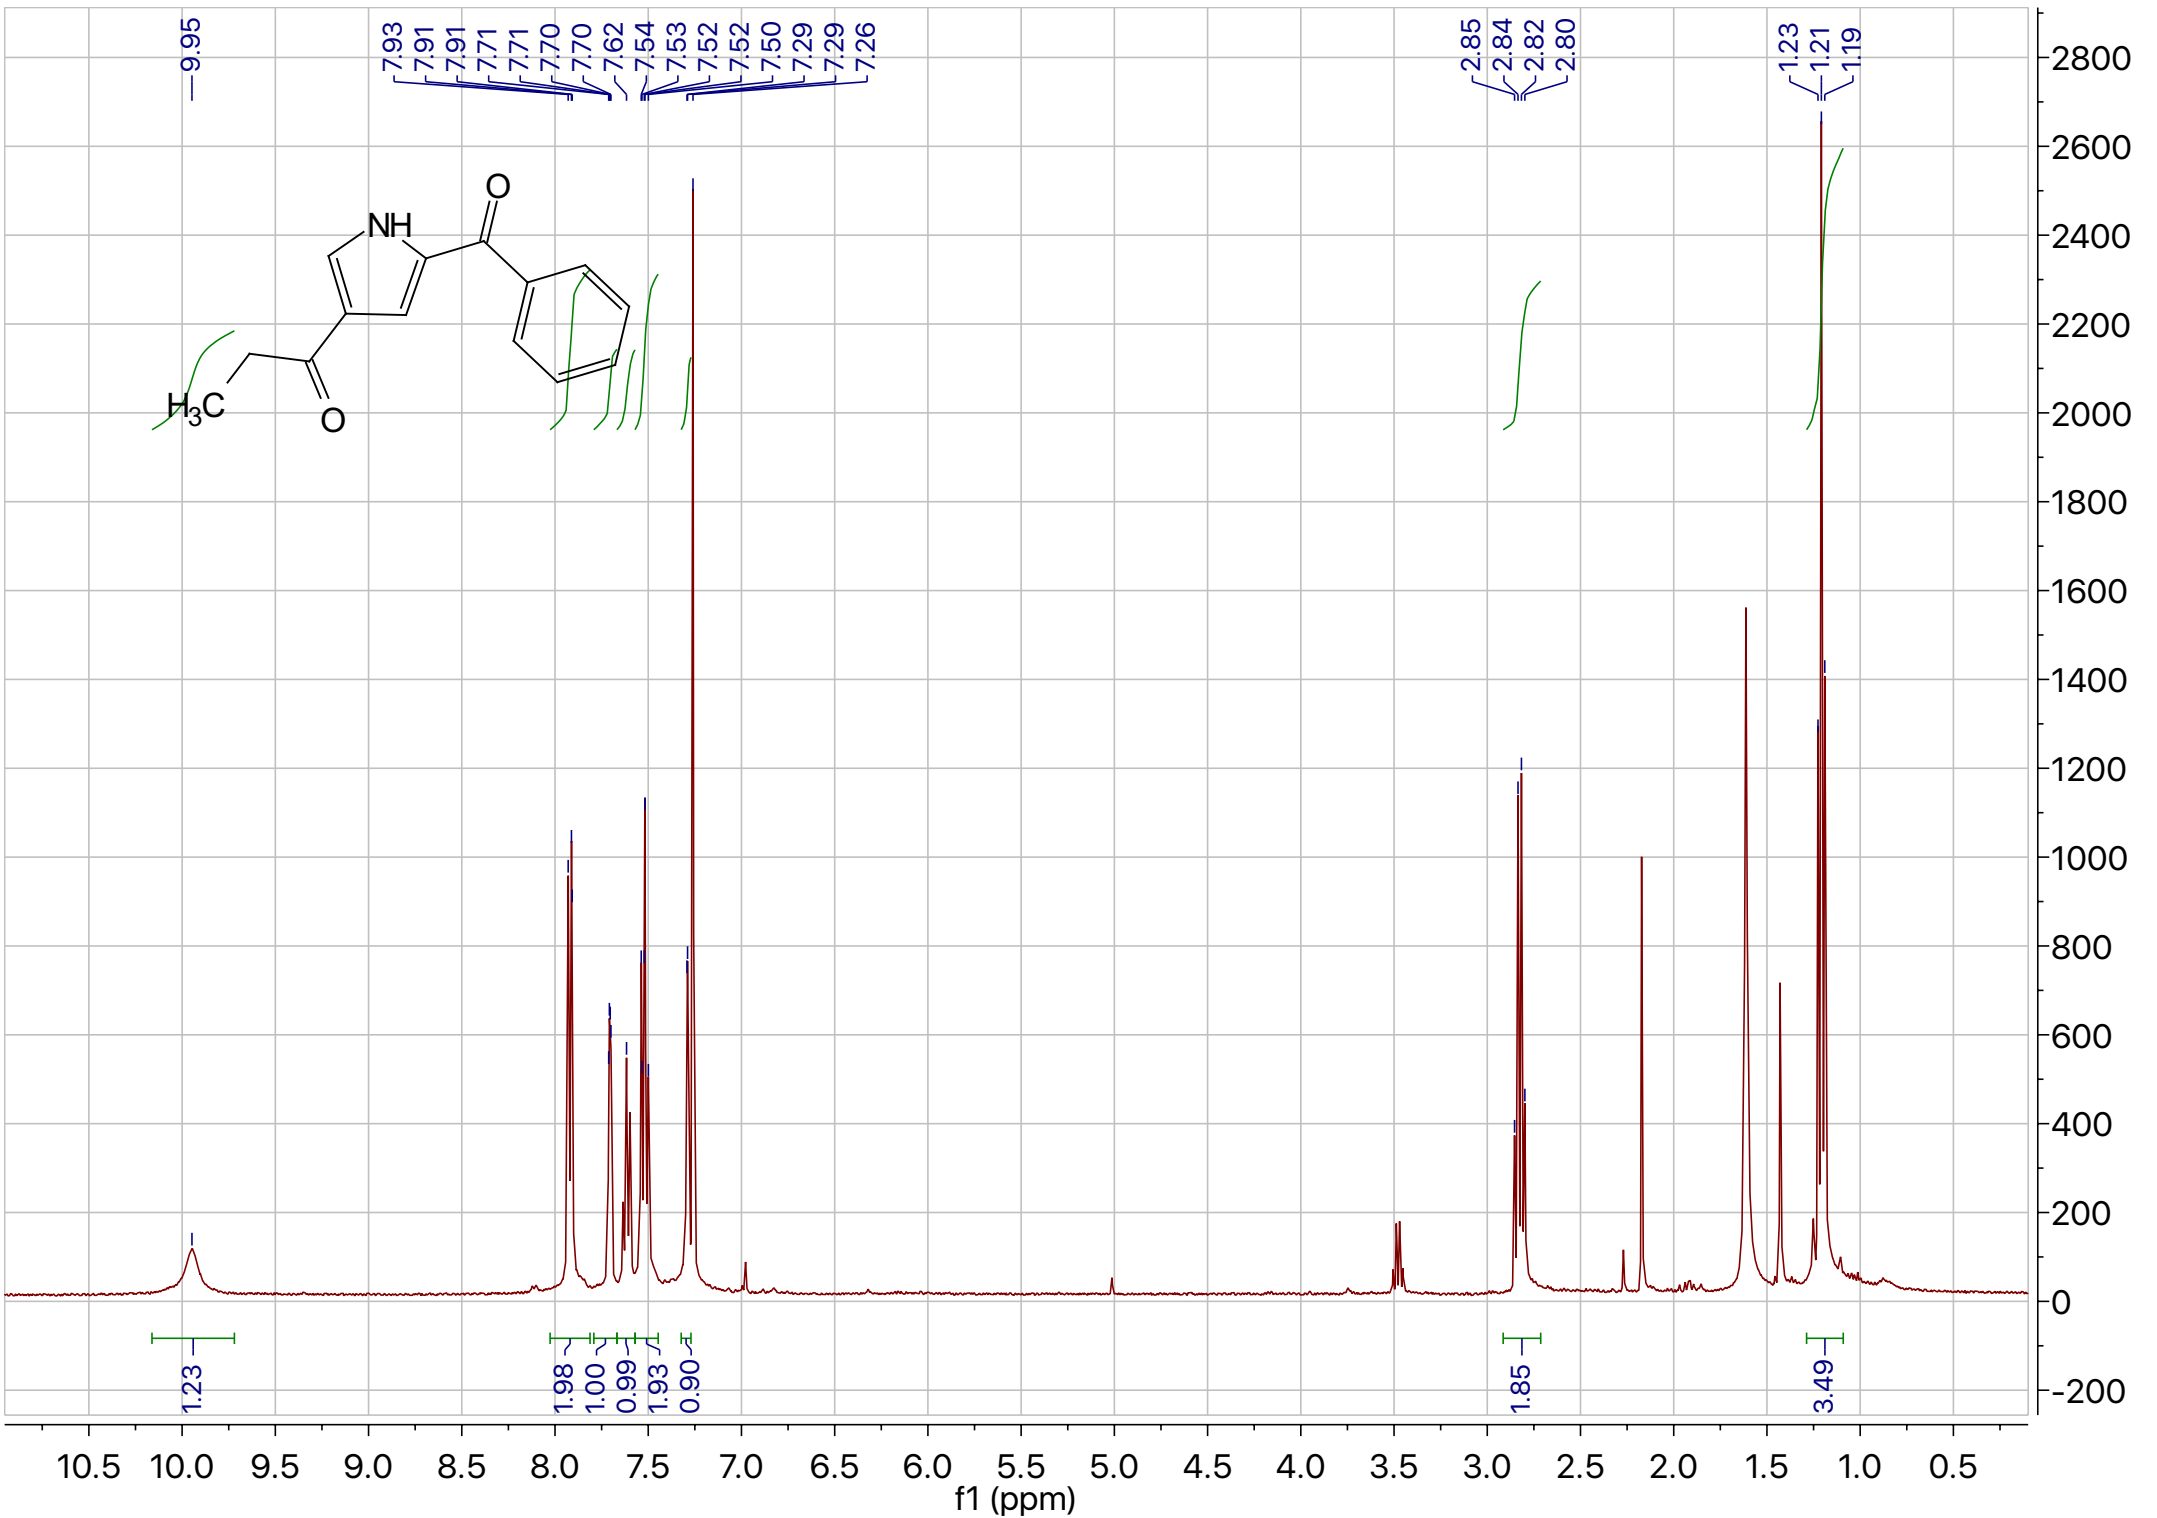



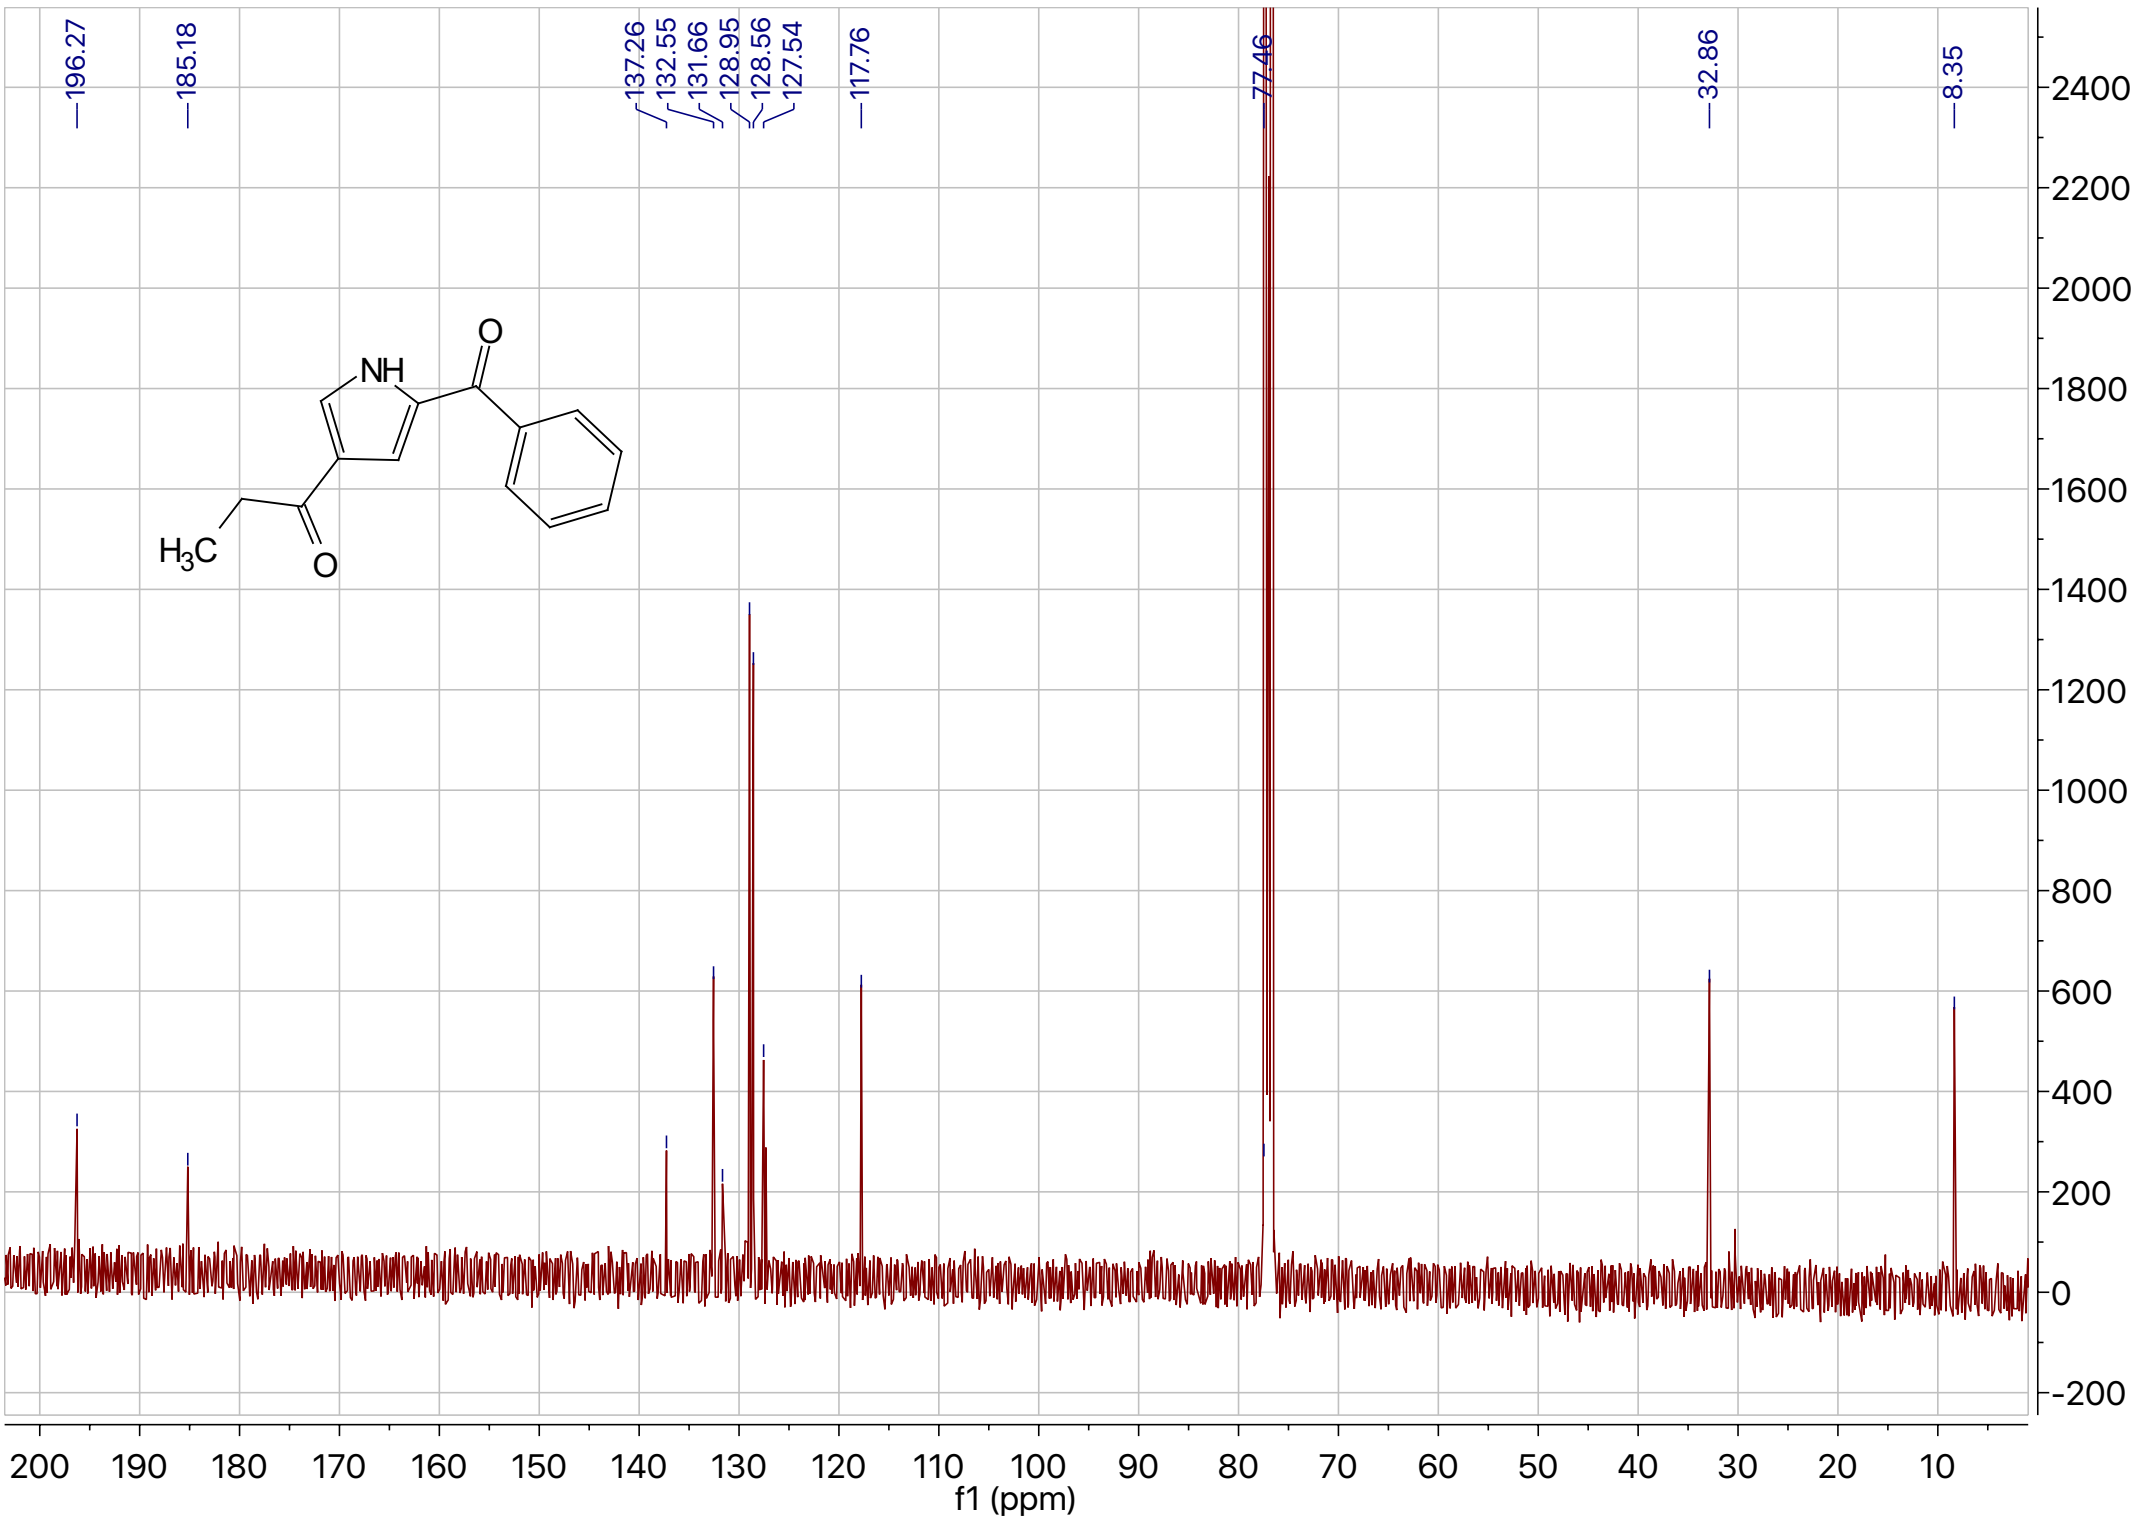

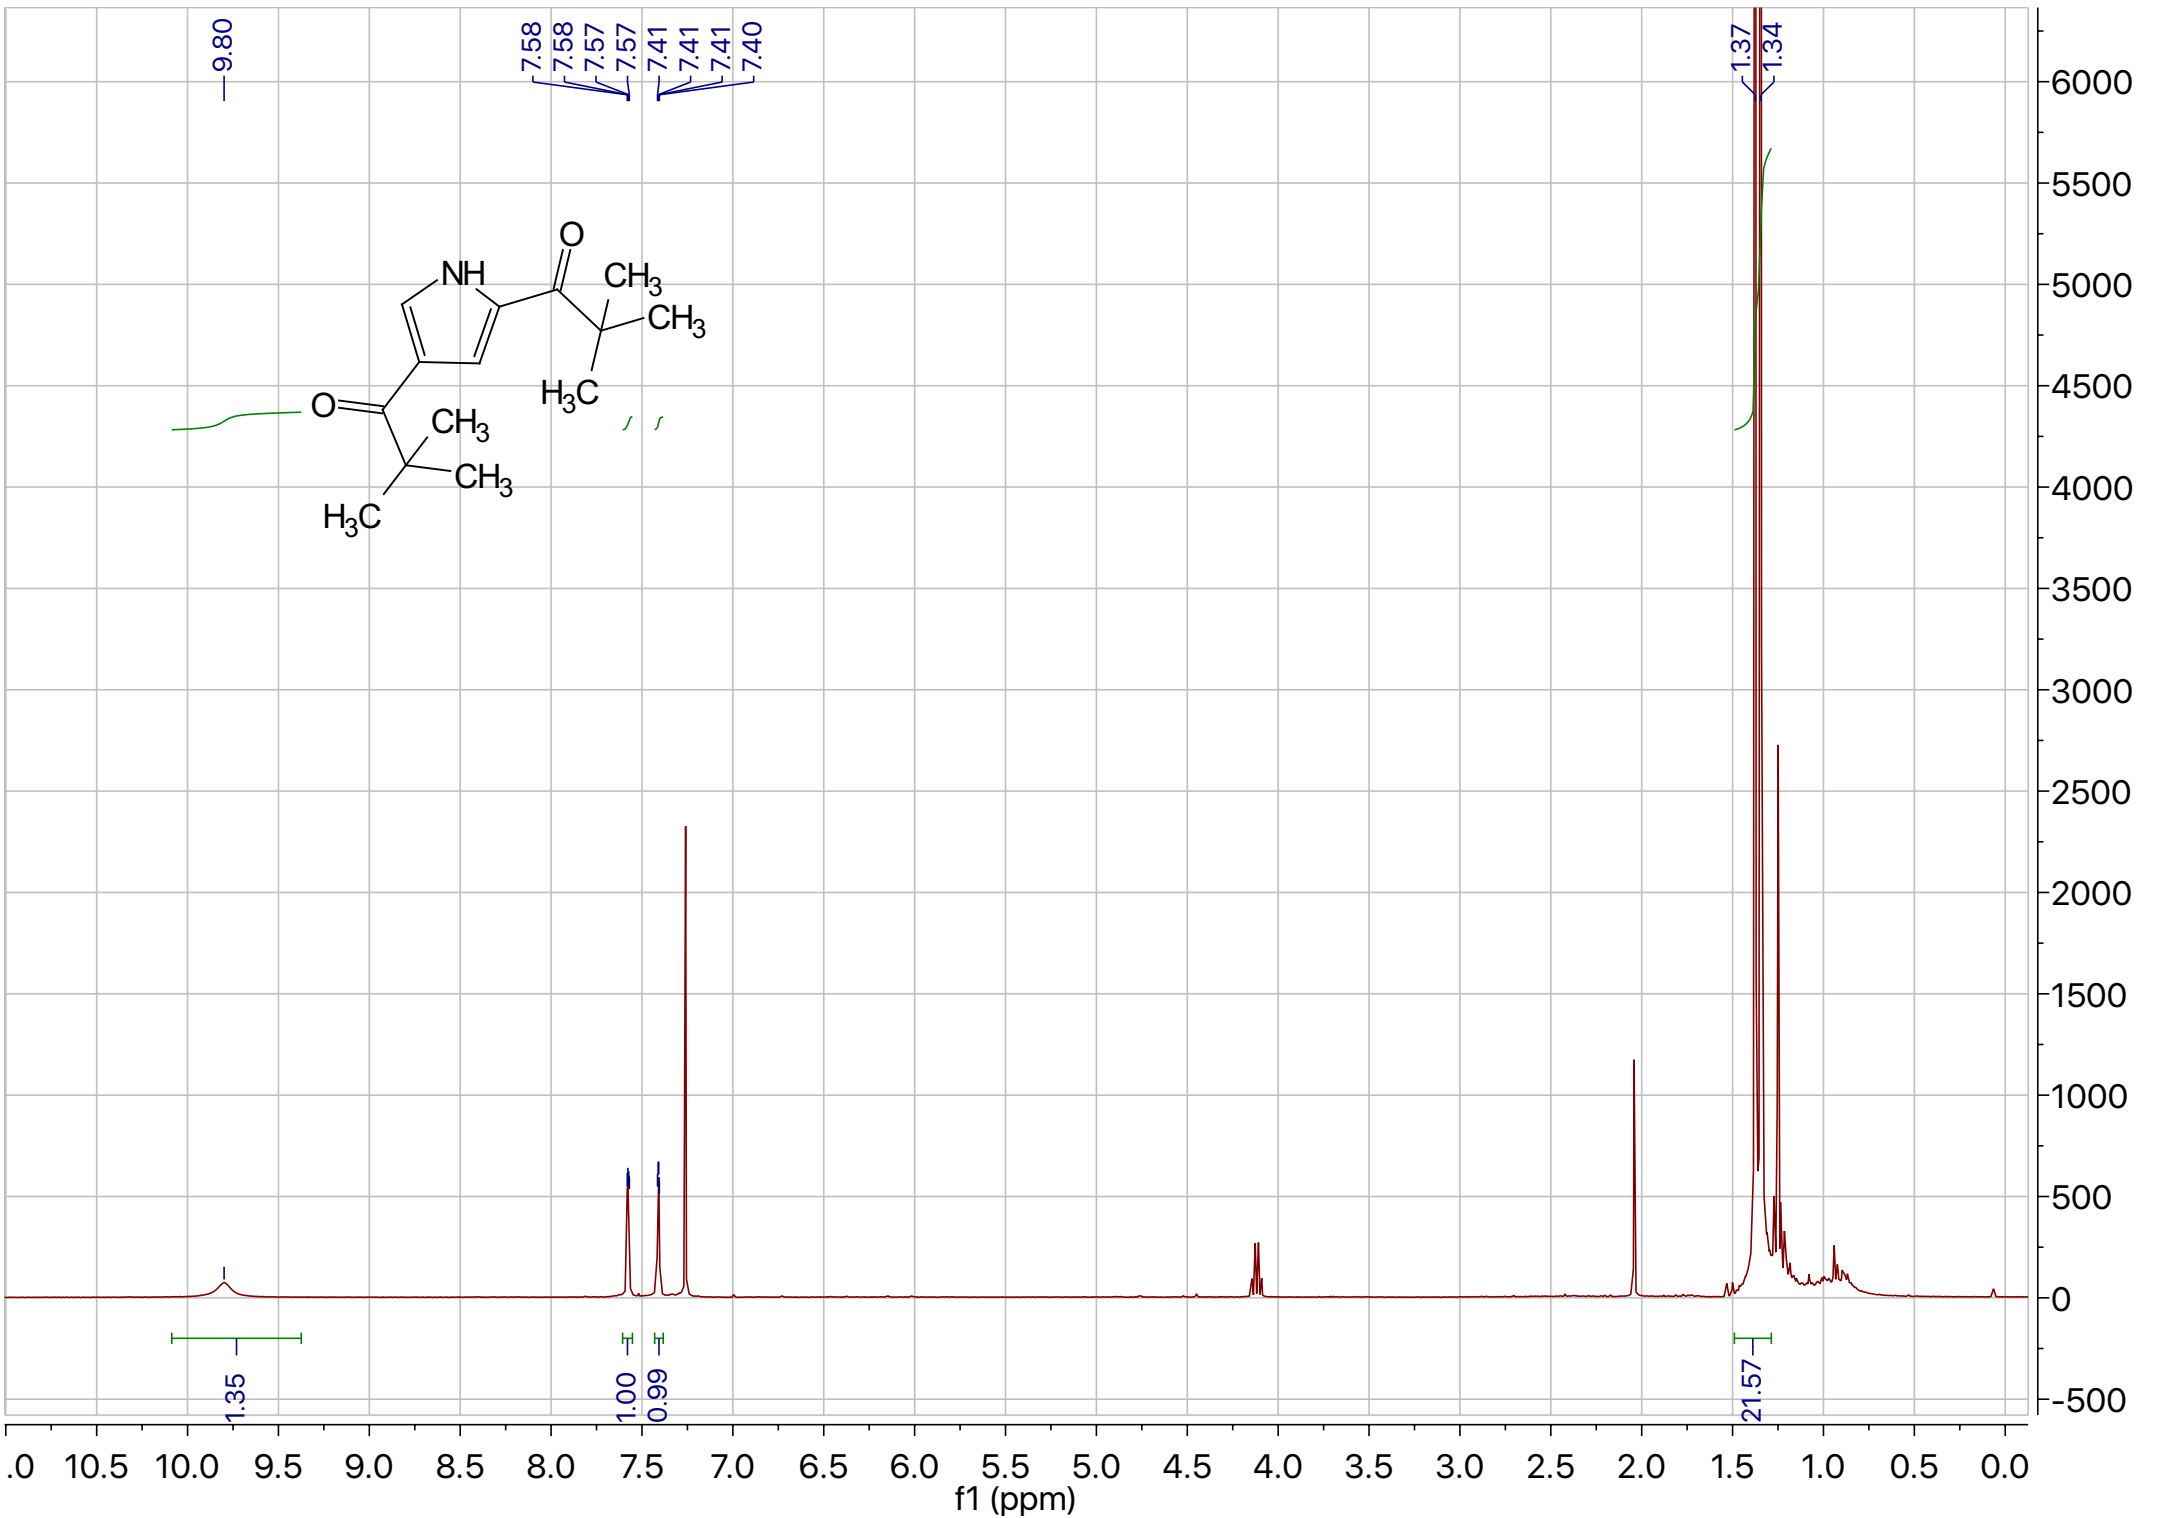

9.80

7.58  
7.58  
7.57  
7.57  
7.41  
7.41  
7.41  
7.40

1.37  
1.34

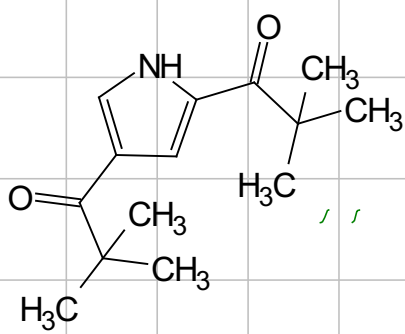

f1 (ppm)

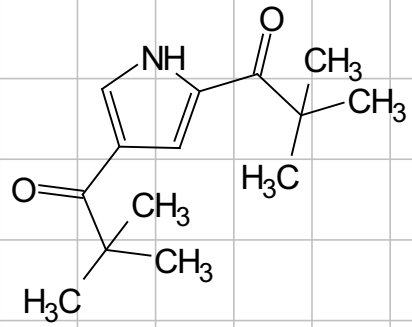

201.38  
197.34

128.84  
126.53  
124.17  
116.83

28.22  
28.06

77.48

230 220 210 200 190 180 170 160 150 140 130 120 110 100 90 80 70 60 50 40 30 20 10 0 -10  
f1 (ppm)

15000  
14000  
13000  
12000  
11000  
10000  
9000  
8000  
7000  
6000  
5000  
4000  
3000  
2000  
1000  
0  
-1000

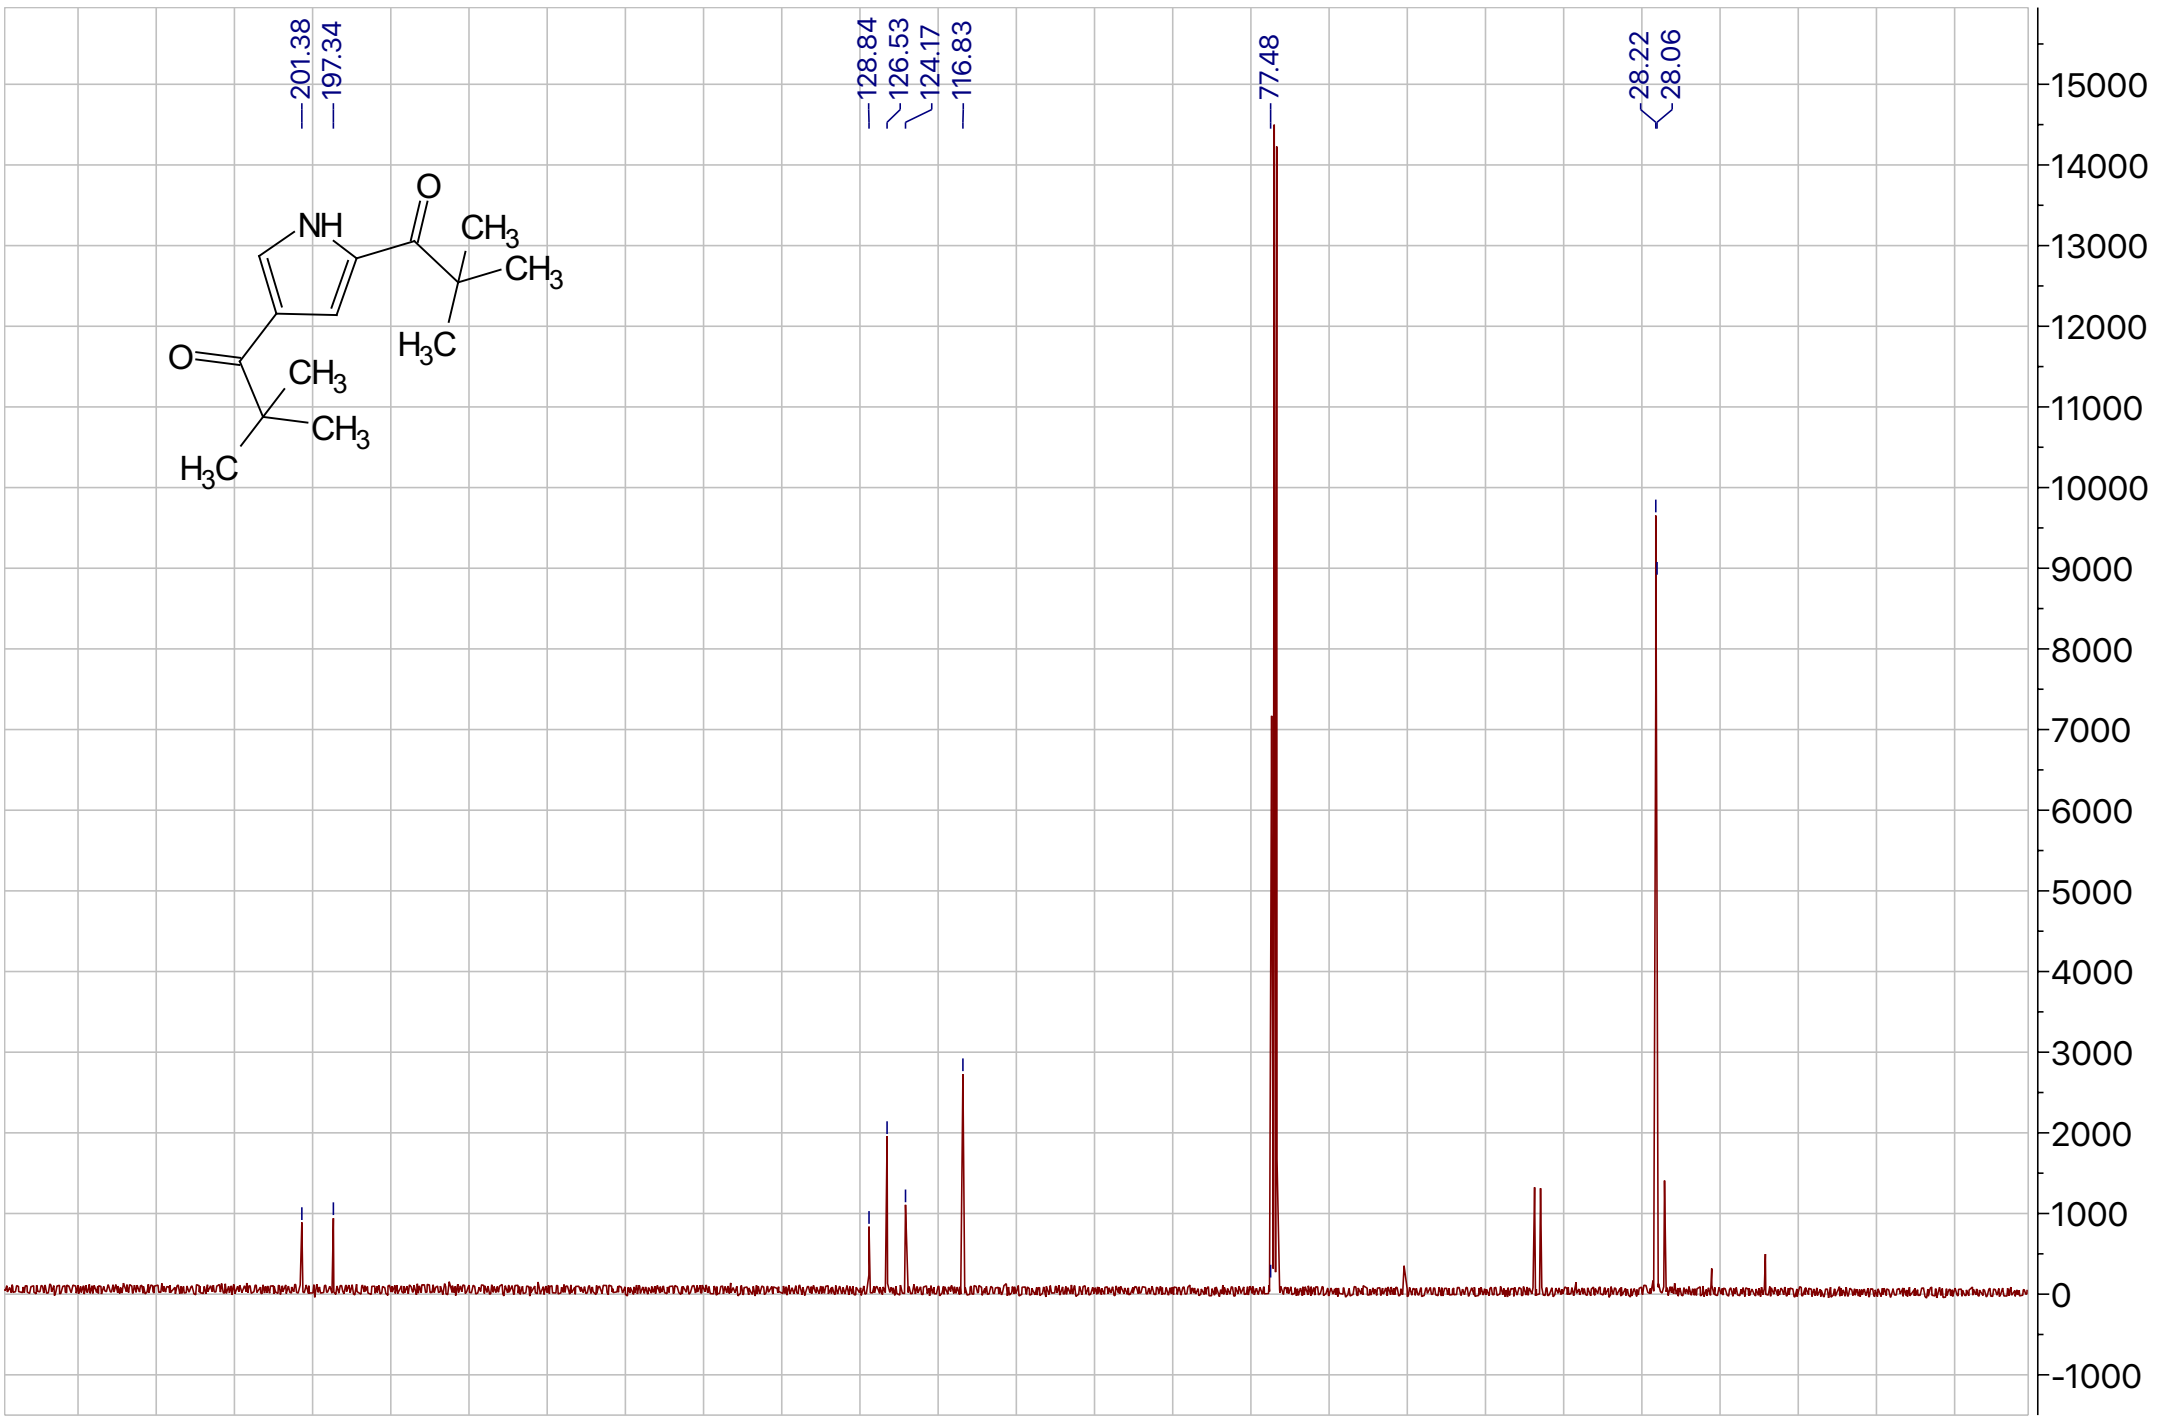

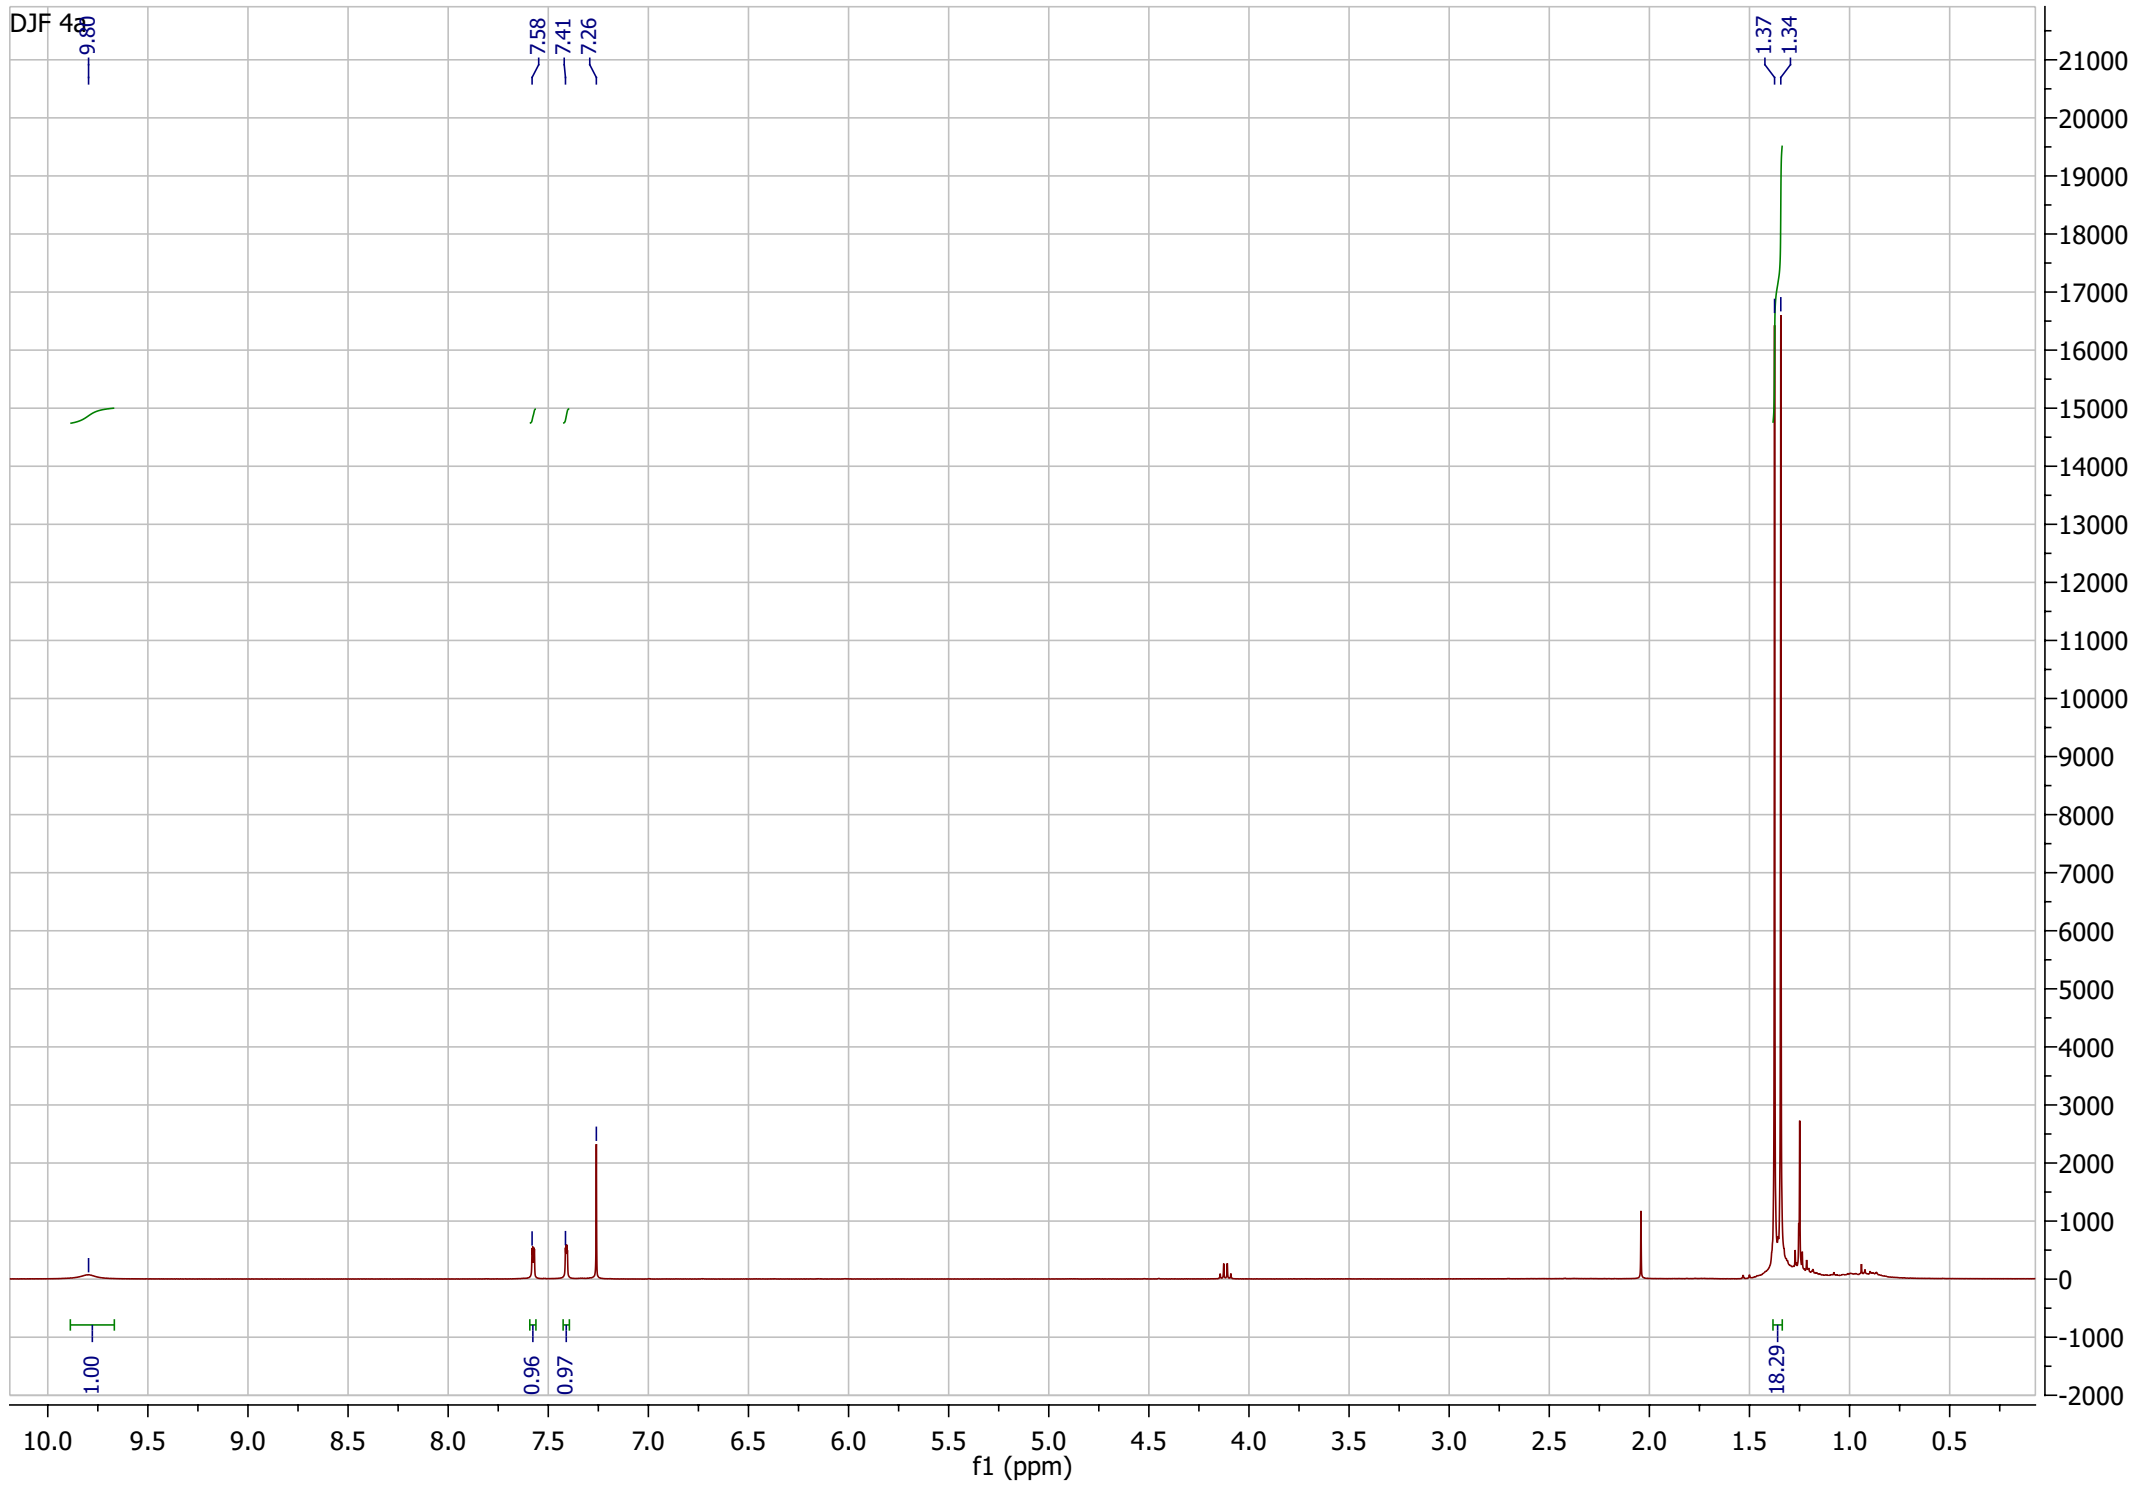

DJF 4a

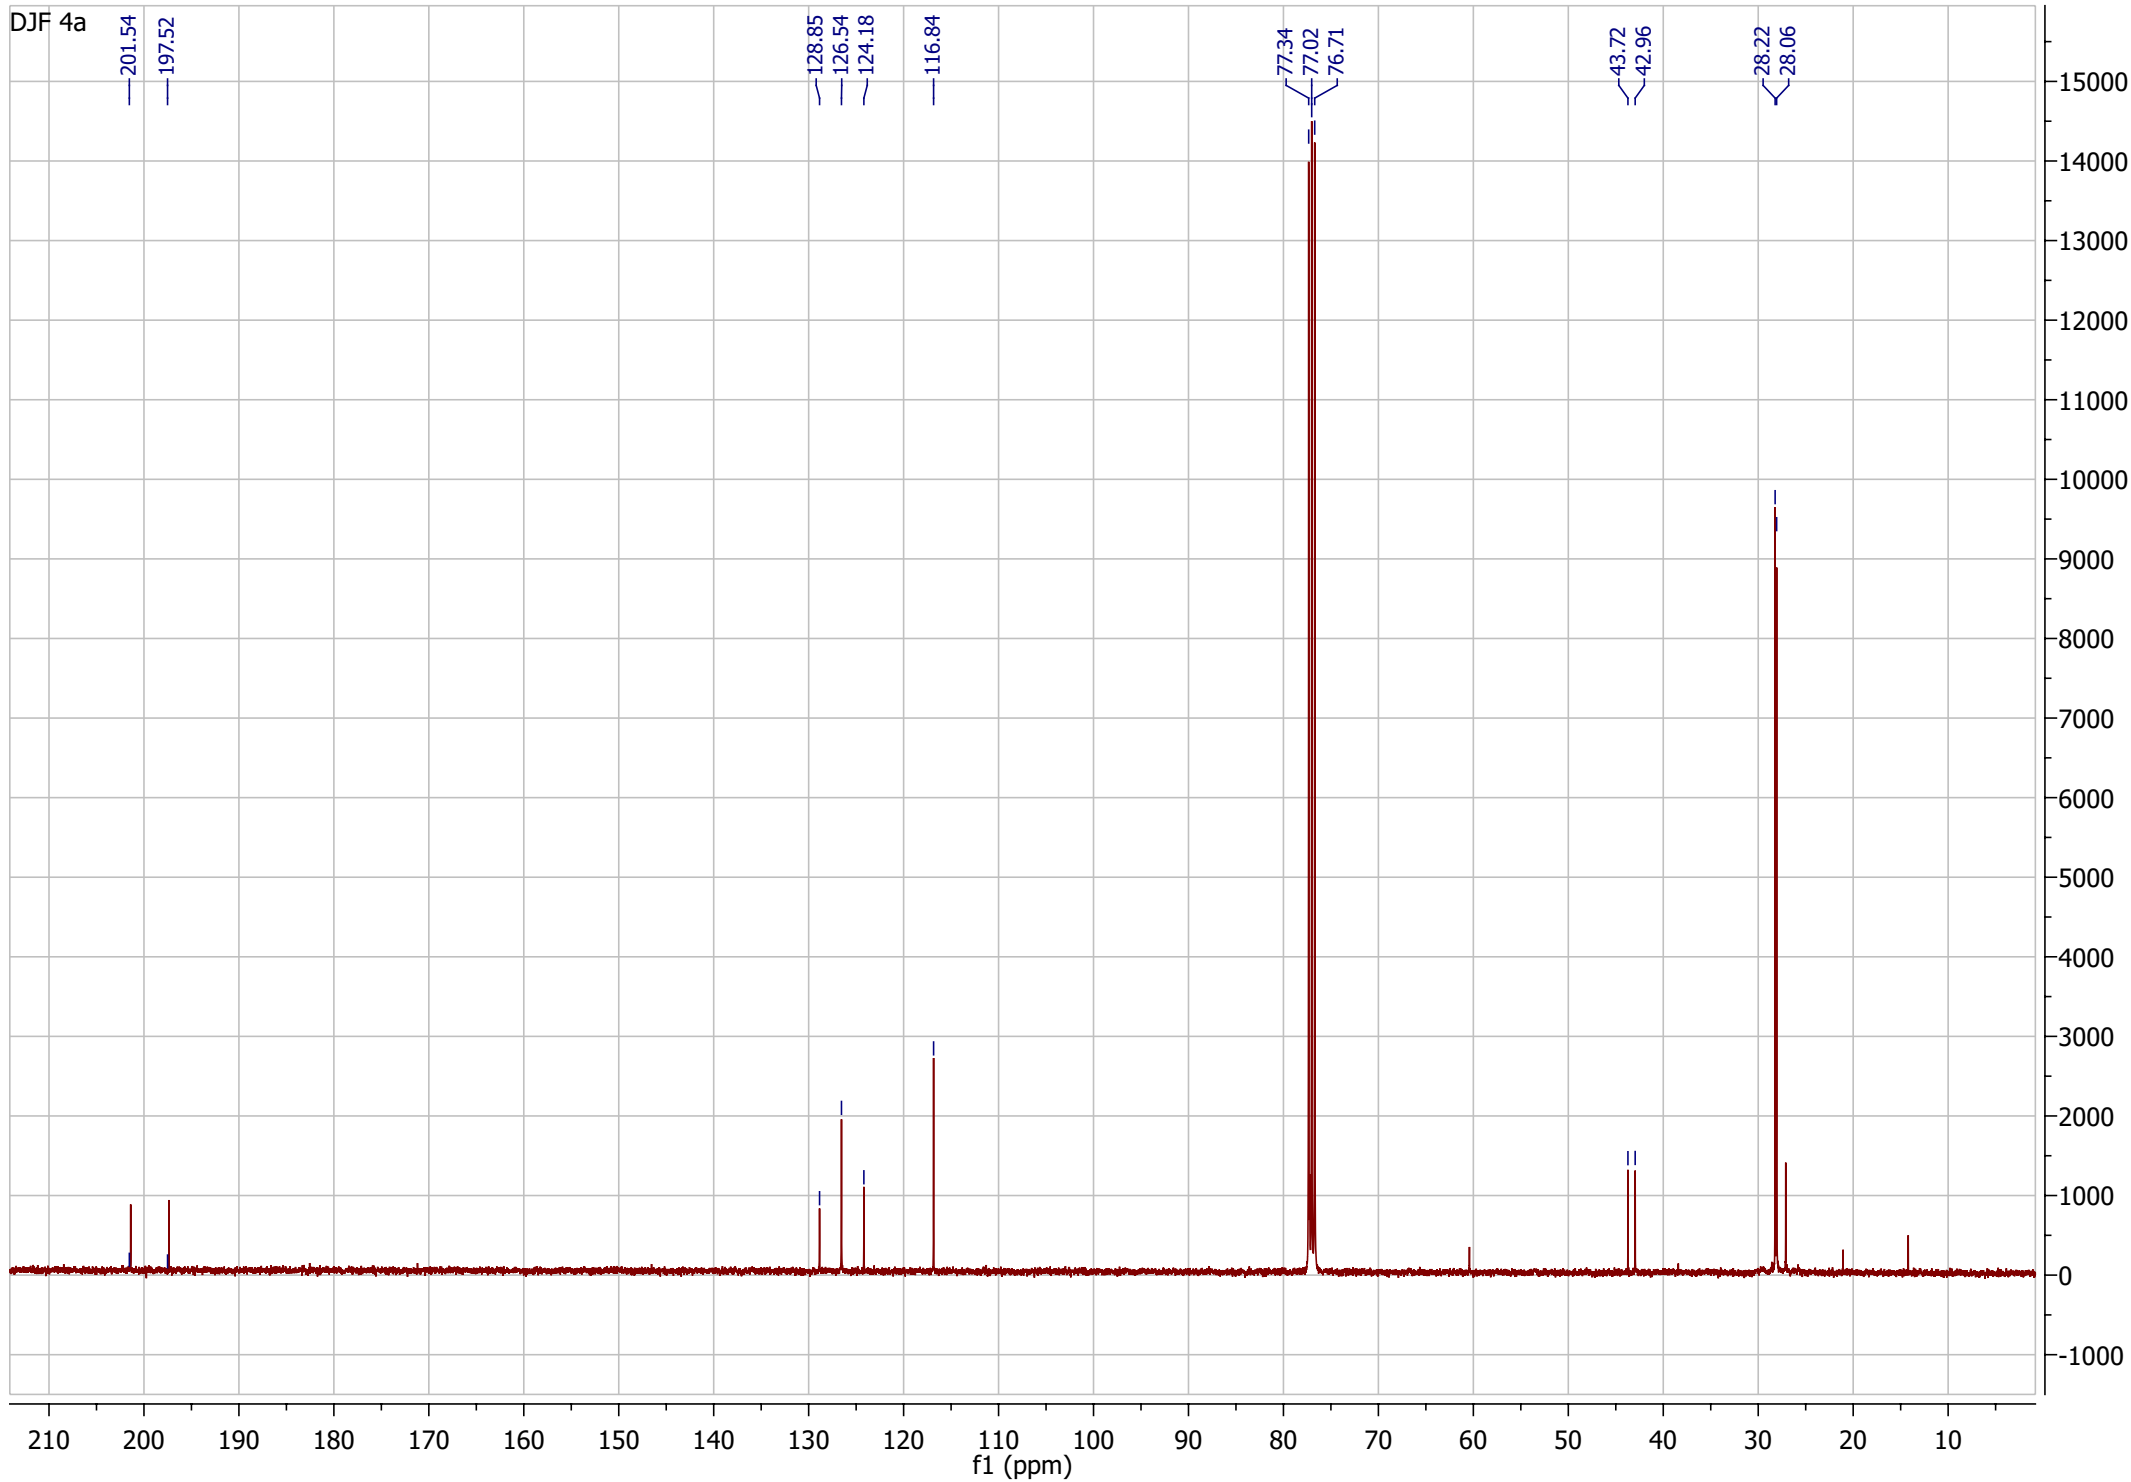

Supplement: mmc1 [file mmc1.pdf]
